# Supplementary material for: A concise route to functionalized benzofurans directly from gem-dibromoalkenes and phenols
Source: Royal Society of Chemistry journal article supplement (doi:10.1039/c5ra13213d), 2015-01-01
Supplement: c5ra13213d1.pdf [file c5ra13213d1.pdf]

# A concise route to functionalized benzofurans directly from *gem*-dibromoalkenes and phenols

Maddali L. N. Rao,\* and Priyabrata Dasgupta

Department of Chemistry, Indian Institute of Technology Kanpur, Kanpur 208 016, India

[maddali@iitk.ac.in](mailto:maddali@iitk.ac.in)

## Supporting Information

### (Contents)

|                                                                                                      |           |
|------------------------------------------------------------------------------------------------------|-----------|
| 1. Preparation of (2,2-dibromovinyl)benzene.....                                                     | S2        |
| 2. Preparation of <b>1c</b> .....                                                                    | S2        |
| 3. Gram scale reaction for <b>2.26</b> .....                                                         | S3        |
| 4. Spectral data of intermediates <b>4c</b> and <b>5c</b> .....                                      | S4        |
| 5. <sup>1</sup> H, <sup>13</sup> C and HRMS spectra of intermediate <b>1c</b> .....                  | S5-S7     |
| 6. <sup>1</sup> H, <sup>13</sup> C and HRMS spectra of intermediate <b>3c</b> .....                  | S8-S10    |
| 7. <sup>1</sup> H, <sup>13</sup> C and HRMS spectra of <b>2.1-2.28</b> and <b>3.1-3.4</b> .....      | S11-S106  |
| 8. <sup>1</sup> H, <sup>13</sup> C and HRMS spectra of intermediates <b>4c</b> and <b>5c</b> .....   | S107-S112 |
| 9. <sup>1</sup> H, <sup>13</sup> C and HRMS spectra of benzodifurans <b>4.1</b> and <b>5.1</b> ..... | S113-S118 |
| 10. Crystal structure determination of benzodifuran <b>4.1</b> .....                                 | S119      |

## 1. Preparation of (2,2-dibromovinyl)benzene:

To a round bottom flask, benzaldehyde (1 g, 9.42mmol, 1equiv) in 30 mL DCM and cooled at 0 °C under nitrogen atmosphere. Then, CBr<sub>4</sub> (6.2 g, 18.84 mmol, 2 equiv) and PPh<sub>3</sub> (9.9 g, 37.68 mmol, 4 equiv) were added successively in portions and stirred for 1 h under N<sub>2</sub>. After that, the reaction mixture was quenched with hexane, filtered and the eluted part was concentrated for further purification by column chromatography (100-200 mesh silica-gel) using hexane as eluent. The desired product was obtained as pale yellow liquid (2.3 g, 93%) and is consistent with literature data.

Ref. M. L. N. Rao, D. N. Jadhav and P. Dasgupta, *Org. Lett.*, 2010, 12, 2048-2051.

## 2. Preparation of 1c:

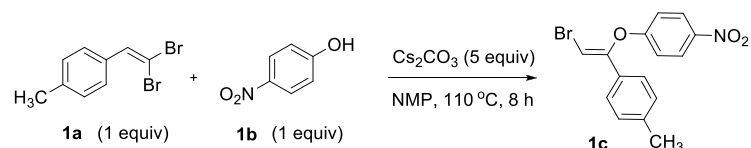

An oven-dried Schlenk tube under N<sub>2</sub> atmosphere was charged with 1-(2,2-dibromovinyl)-4-methylbenzene **1a** (0.104 g, 0.375 mmol, 1 equiv), *p*-nitrophenol **1b** (0.52 g, 0.375 mmol, 1equiv), Cs<sub>2</sub>CO<sub>3</sub> (0.611 g, 1.875 mmol, 5 equiv) and NMP (3 mL) respectively. The reaction mixture was stirred at 110 °C in an oil bath for 8 h under N<sub>2</sub>. The mixture was cooled to r.t. and followed by work-up using ethylacetate (50 mL). The organic extract was washed with water (10 mL), brine (10 mL), dried over anhydrous MgSO<sub>4</sub> and concentrated. The crude was purified by silica-gel column chromatography using 2% EtOAc in hexane as eluent. Product **1c** was isolated as yellow viscous liquid (0.109 g, 87%). This procedure was also followed for the preparation of intermediate **3c** with (*E*)-(4,4-dibromobuta-1,3-dienyl)benzene and *p*-cyanophenol.

### 3. Gram scale reaction (2.26):

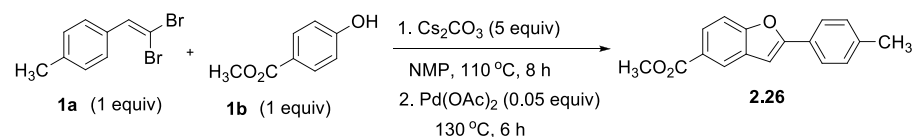

An oven-dried 100 mL Schlenk tube equipped with a magnetic pellet under  $\text{N}_2$  atmosphere, added 1-(2,2-dibromovinyl)-4-methylbenzene **1a** (1 g, 3.62 mmol, 1 equiv), methyl 4-hydroxybenzoate (0.55 g, 3.62 mmol, 1 equiv),  $\text{Cs}_2\text{CO}_3$  (5.9 g, 18.1 mmol, 5 equiv) and NMP (35 mL) respectively. The reaction mixture was stirred at  $110\text{ }^\circ\text{C}$  in an oil bath for 8 h under  $\text{N}_2$ . Then the mixture was cooled to r.t and added  $\text{Pd}(\text{OAc})_2$  (0.041 g, 0.181 mmol, 0.05 equiv) under  $\text{N}_2$  and continued at  $130\text{ }^\circ\text{C}$  for 6 h. After cooling to r.t, the reaction mixture was transferred to a round-bottom flask to distill out NMP under reduced pressure. The obtained crude was diluted with ethyl acetate, passed through a column of silica-gel with repeated washings. The combined organic extract was concentrated to lowered volume and washed with water and brine. The ethyl acetate was concentrated and the crude was purified by using silica-gel column chromatography with 1% EtOAc in hexane to obtain **2.26** as a brown solid (0.405 g, 42%).

#### 4. Spectral data of intermediates 4c and 5c:

**4c.** Pale yellow viscous liquid (0.095 g, 50%, as isomeric mixtures);  $R_f = 0.64$  (EtOAc-hexane 1:9).  $^1\text{H}$  NMR (400 MHz,  $\text{CDCl}_3$ ):  $\delta$  7.38 (d, 0.8H,  $J = 8.72$  Hz, Ar-H), 7.28-7.25 (m, 6H, Ar-H), 7.16-7.13 (d, 0.4H,  $J = 8.72$  Hz, Ar-H), 7.07-6.99 (m, 7H, Ar-H), 6.62 (m, 1H, Ar-H), 6.57-6.54 (m, 3H, Ar-H), 6.47-6.45 (m, 0.5H, Ar-H), 6.40 (d, 0.6H,  $J = 6.4$  Hz, Ar-H), 6.36 (s, 2H,  $-\text{CH}_{\text{olefin}}$ ), 6.30 (s, 0.2H,  $-\text{CH}_{\text{olefin}}$ ), 2.30 (s, 8H,  $-\text{CH}_3$ ), 2.28 (s, 1H,  $-\text{CH}_3$ ).  $^{13}\text{C}$  (100 MHz,  $\text{CDCl}_3$ ):  $\delta$  157.0, 153.3, 139.2, 130.6, 130.0, 129.4, 128.8, 125.8, 110.2, 105.2, 94.2, 21.3. IR (film): 3165, 2862, 1543, 1026, 667  $\text{cm}^{-1}$ . HRMS (EI) calcd for  $\text{C}_{24}\text{H}_{20}\text{Br}_2\text{O}_2$  [ $\text{M}^+$ ] 497.9830; found 497.9839. The intermediate **4c** is susceptible for decomposition on standing at room temperature.

**5c.** Yellow viscous liquid (0.084 g, 38%, as isomeric mixtures);  $R_f = 0.20$  (EtOAc-hexane 1:9).  $^1\text{H}$  NMR (400 MHz,  $\text{CDCl}_3$ ):  $\delta$  7.42 (d, 0.4H,  $J = 9.16$  Hz, Ar-H), 7.30-7.21 (m, 6H, Ar-H), 6.78-6.75 (m, 5H, Ar-H), 6.34 (s, 0.2H,  $-\text{CH}_{\text{olefin}}$ ), 6.32 (s, 2H,  $-\text{CH}_{\text{olefin}}$ ), 3.82 (s, 3H,  $-\text{CO}_2\text{CH}_3$ ), 3.77 (s, 6H,  $-\text{CH}_3$ ).  $^{13}\text{C}$  (100 MHz,  $\text{CDCl}_3$ ):  $\delta$  166.0, 160.4, 156.9, 152.7, 132.5, 131.0, 127.3, 125.5, 114.2, 113.7, 112.2, 111.9, 111.4, 109.8, 109.3, 93.6, 93.4, 55.3, 52.3. IR (film): 3165, 2824, 1703, 1643, 1496, 1138, 1057, 733  $\text{cm}^{-1}$ . HRMS (EI) calcd for  $\text{C}_{26}\text{H}_{22}\text{Br}_2\text{O}_6$  [ $\text{M}^+$ ] 587.9783; found 587.9788.

5.  $^1\text{H}$ ,  $^{13}\text{C}$  and HRMS spectra of intermediate **1c**:

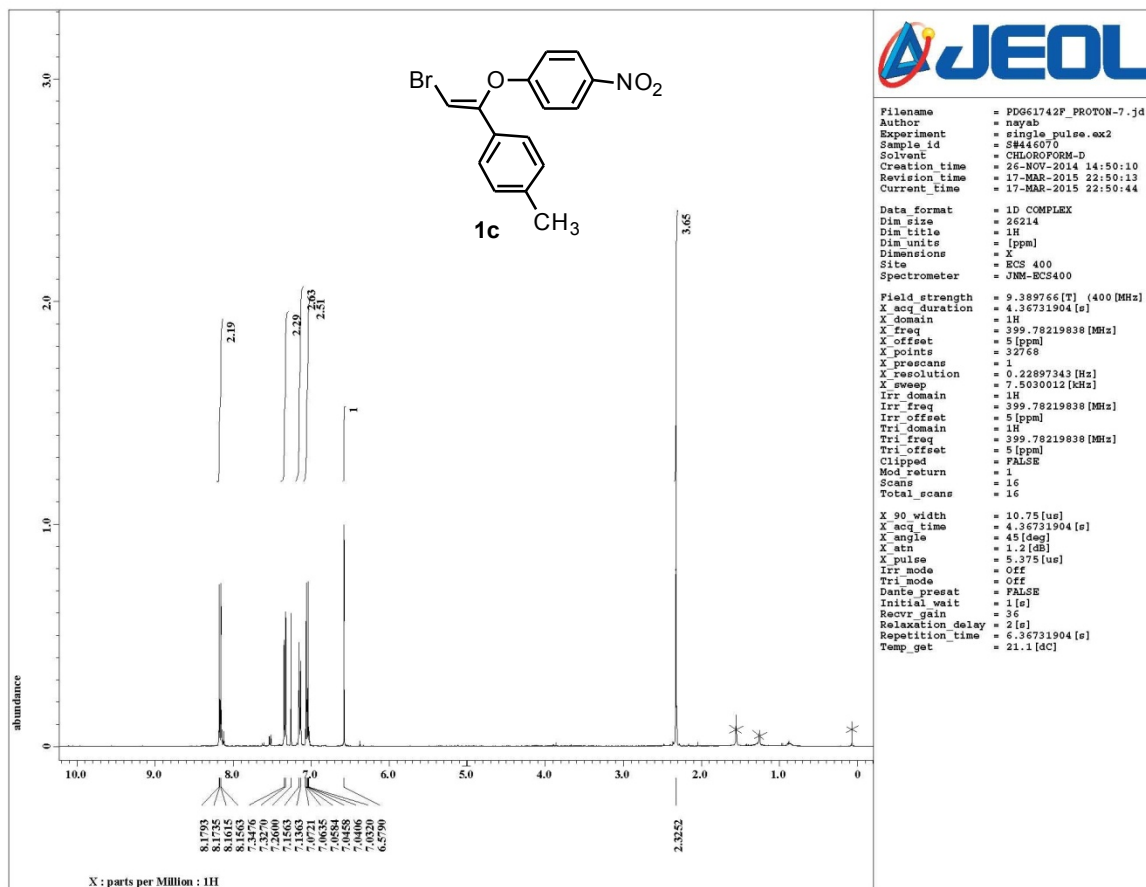

$^1\text{H}$  NMR (400 MHz,  $\text{CDCl}_3$ ) spectrum of **1c**

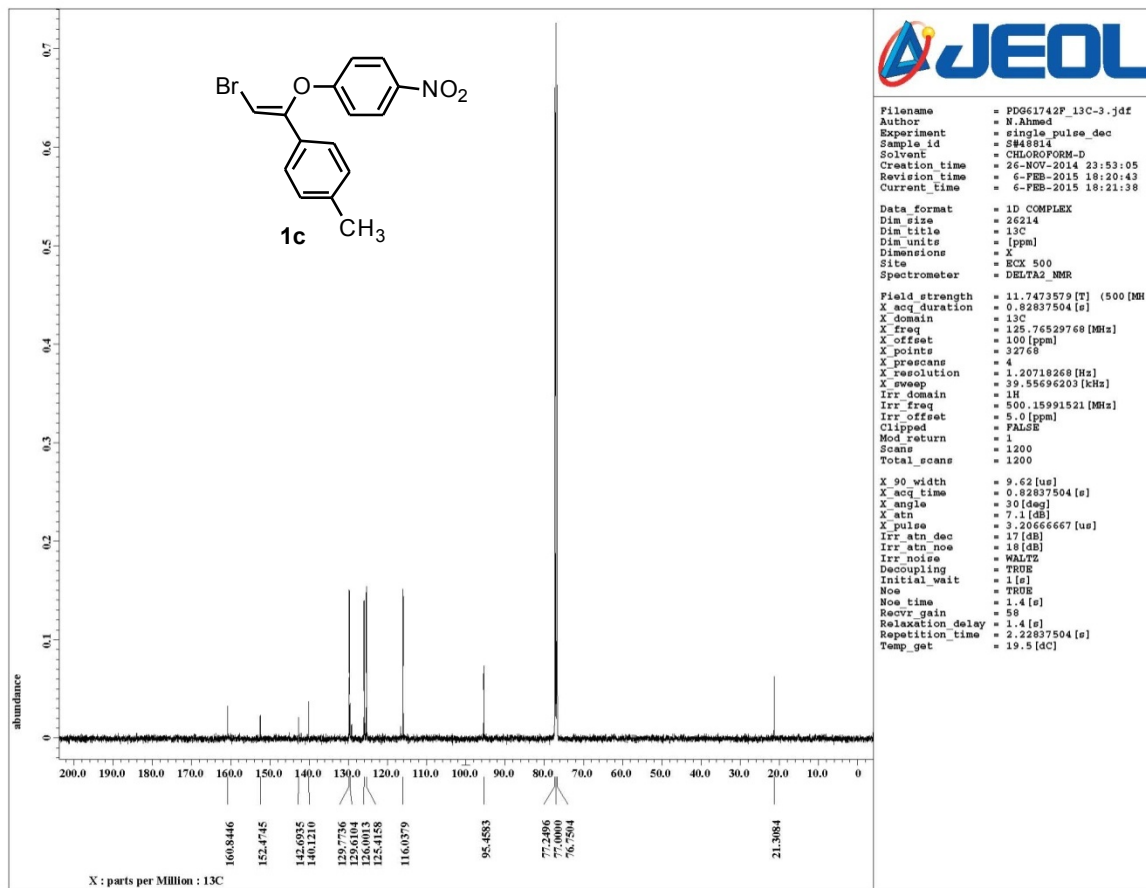

<sup>13</sup>C NMR (125 MHz, CDCl<sub>3</sub>) spectrum of **1c**

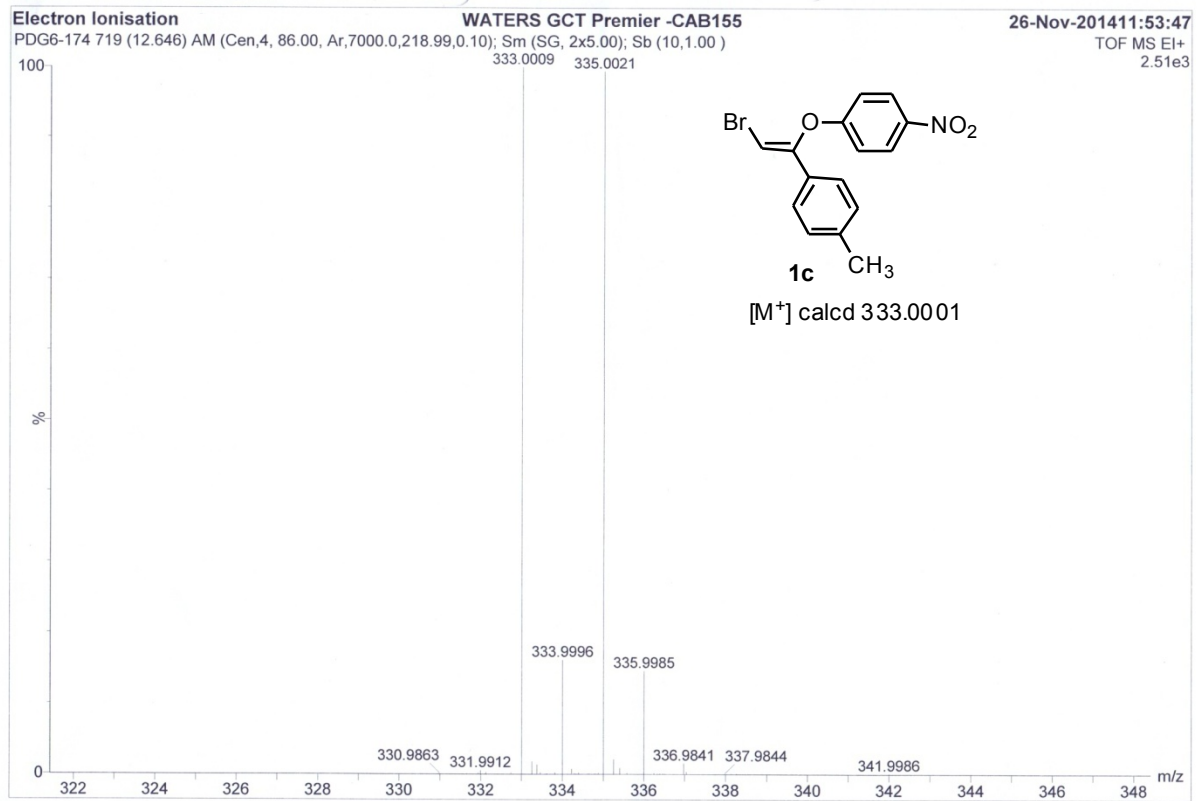

EI (HRMS) spectrum of **1c**

## 6. $^1\text{H}$ , $^{13}\text{C}$ and HRMS spectra of intermediate **3c**:

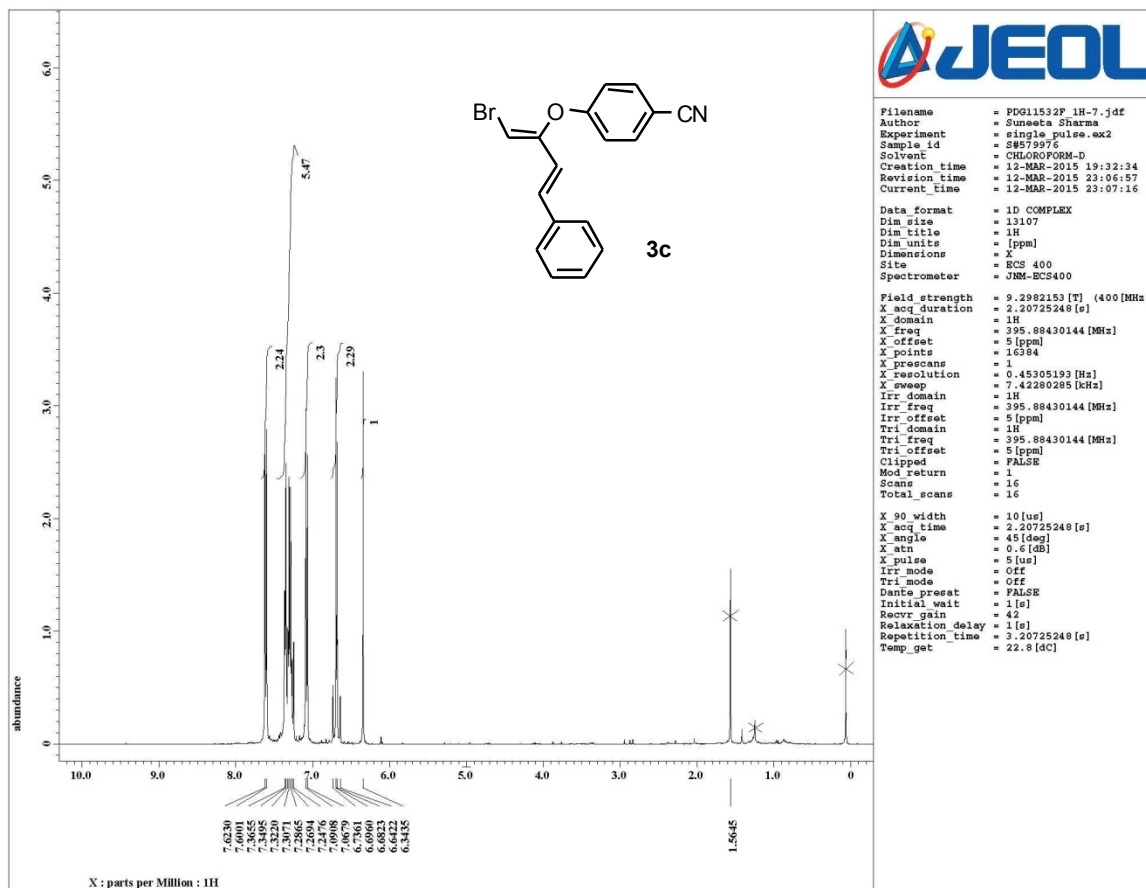

$^1\text{H}$  NMR (400 MHz, CDCl<sub>3</sub>) spectrum of **3c**



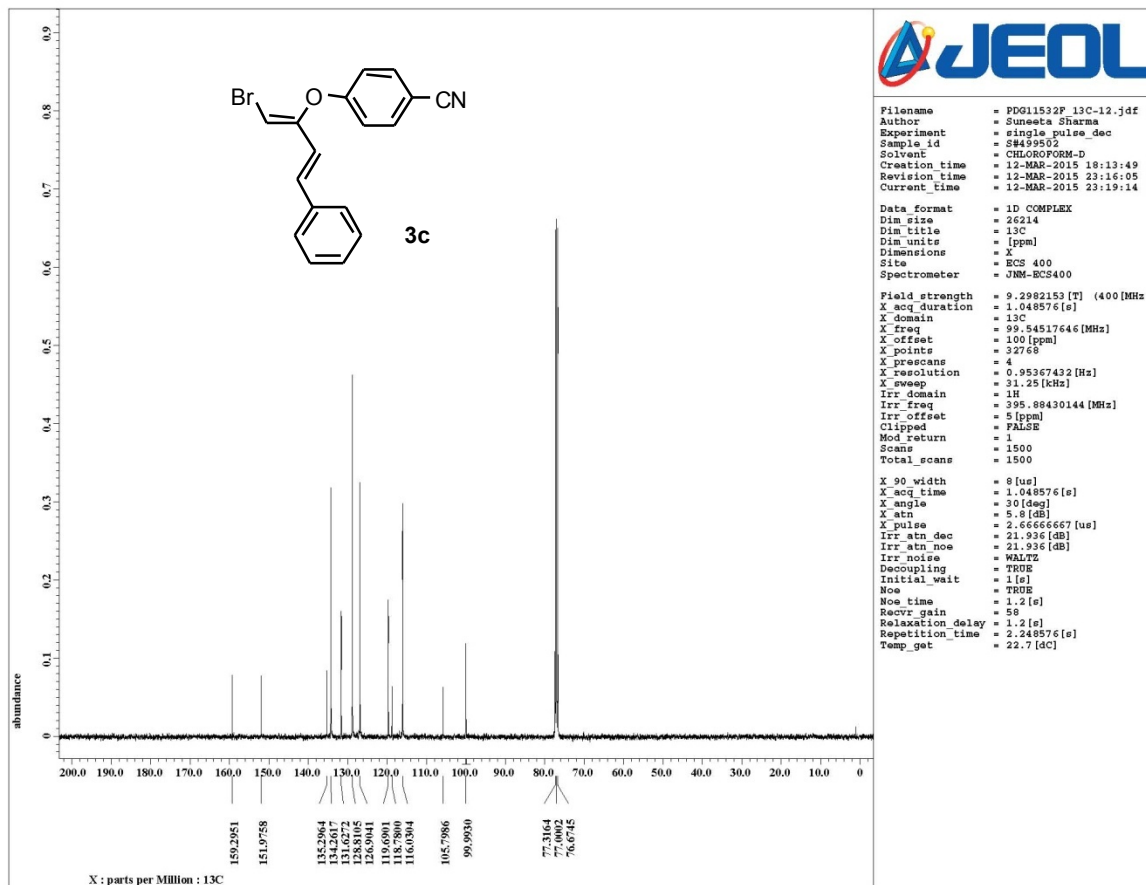

$^{13}\text{C}$  NMR (100 MHz,  $\text{CDCl}_3$ ) spectrum of **3c**

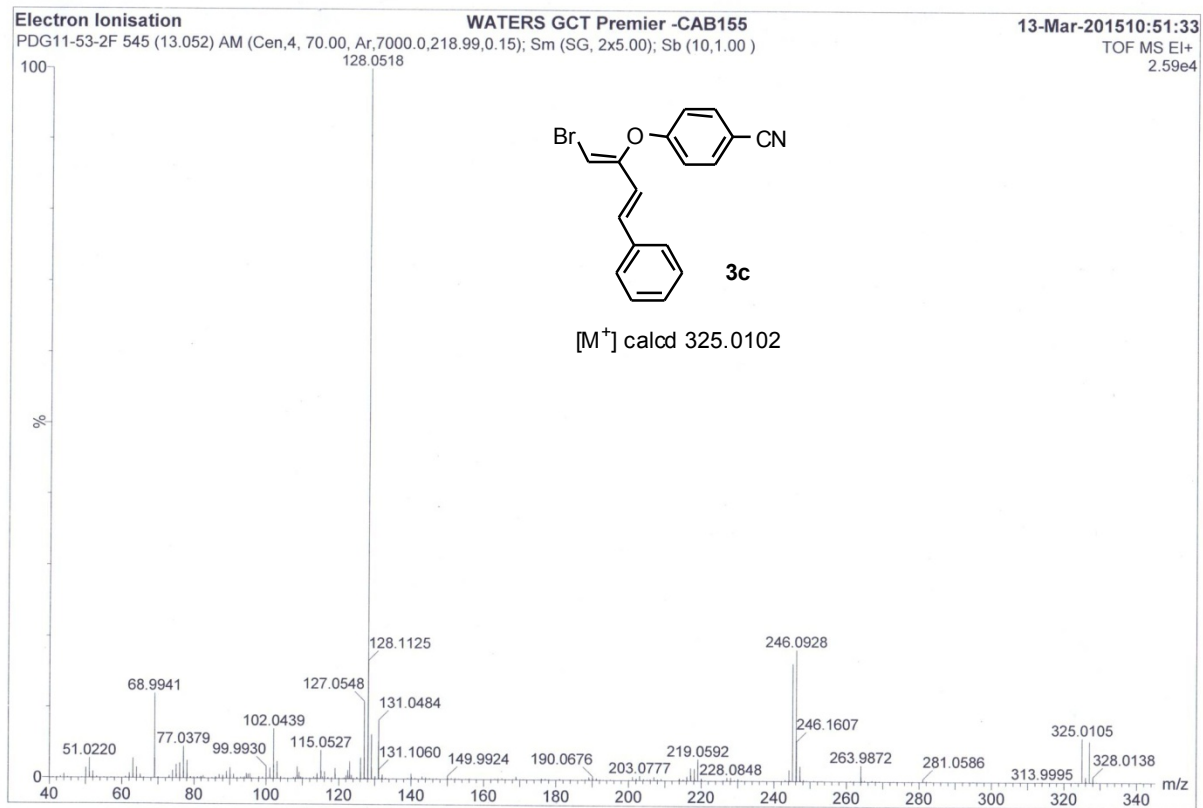

EI (HRMS) spectrum of **3c**

## 7. $^1\text{H}$ , $^{13}\text{C}$ and HRMS spectra of benzofuran products (2.1-3.4):

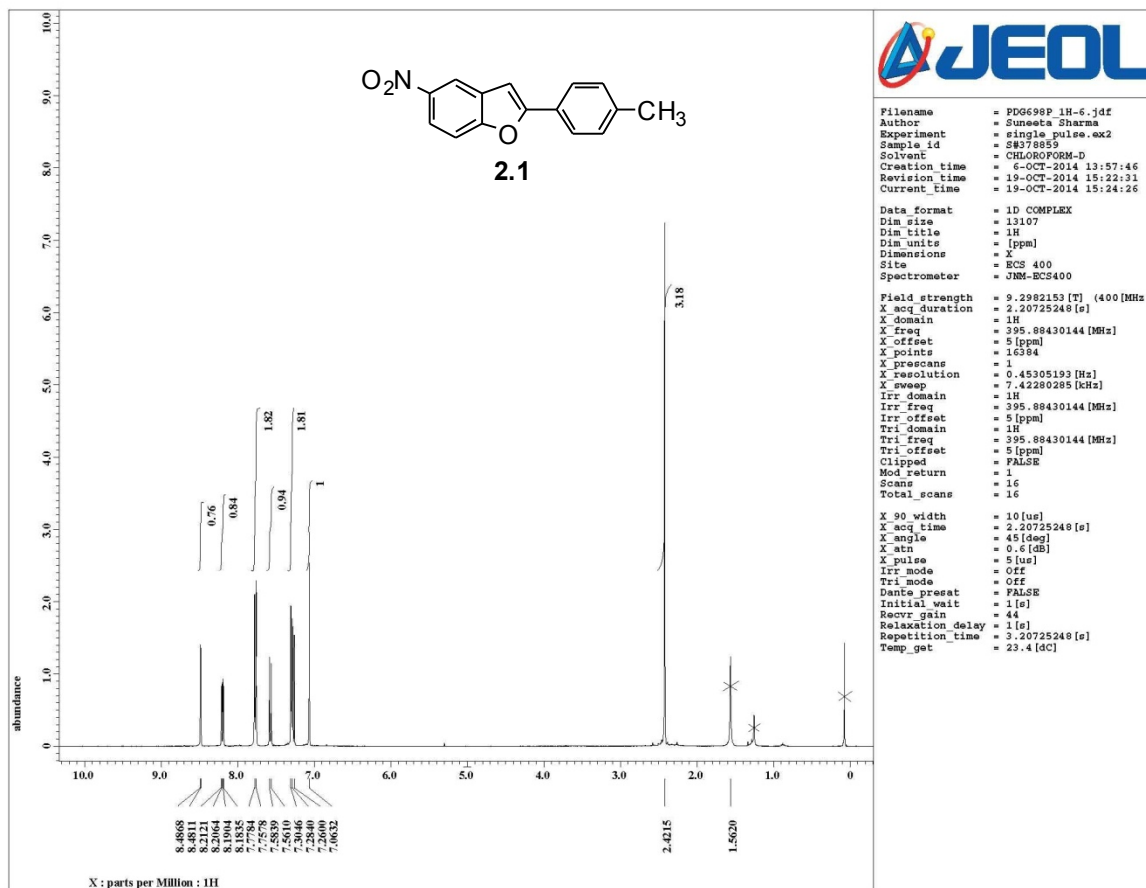

$^1\text{H}$  NMR (400 MHz,  $\text{CDCl}_3$ ) spectrum of **2.1**

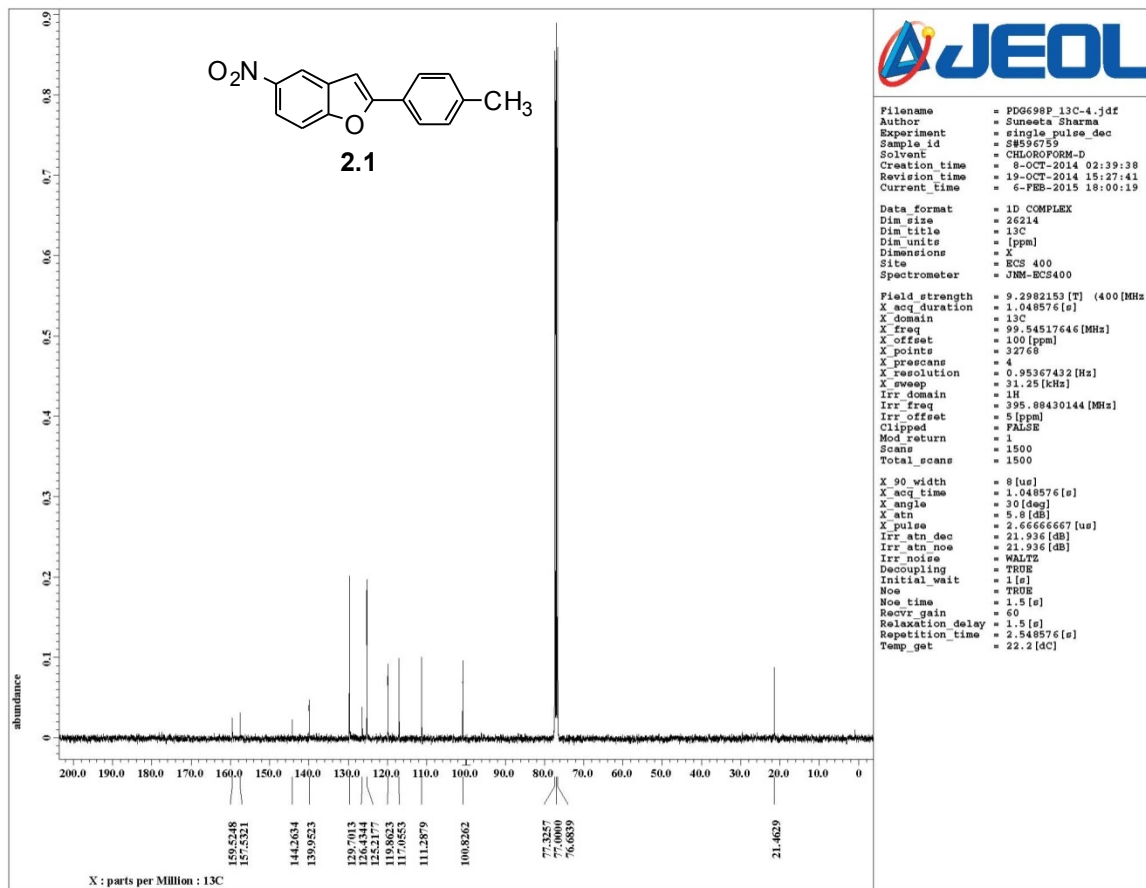

<sup>13</sup>C NMR (100 MHz, CDCl<sub>3</sub>) spectrum of **2.1**

Electrospray ionisation-MS

PDG6-98 16 (0.332) AM (Cen,4, 100.00, Ar,8500.0,556.28,0.07,LS 10); Sm (SG, 2x5.00); Sb (10,1.00 ); Cm (8:32)

WATERS-Q-ToF Premier-HAB2.1

15:08:5916-Aug-2013

1: TOF MSMS 254.08ES+  
553

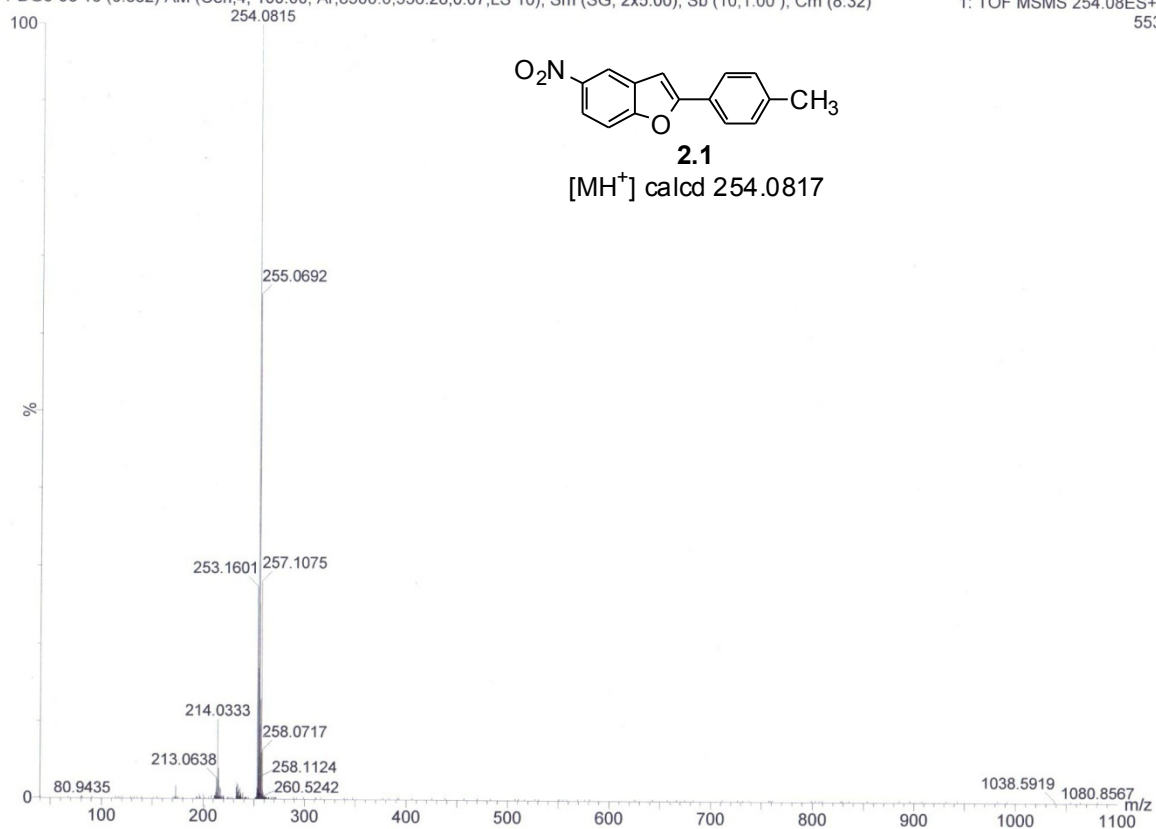

ESI (HRMS) spectrum of **2.1**

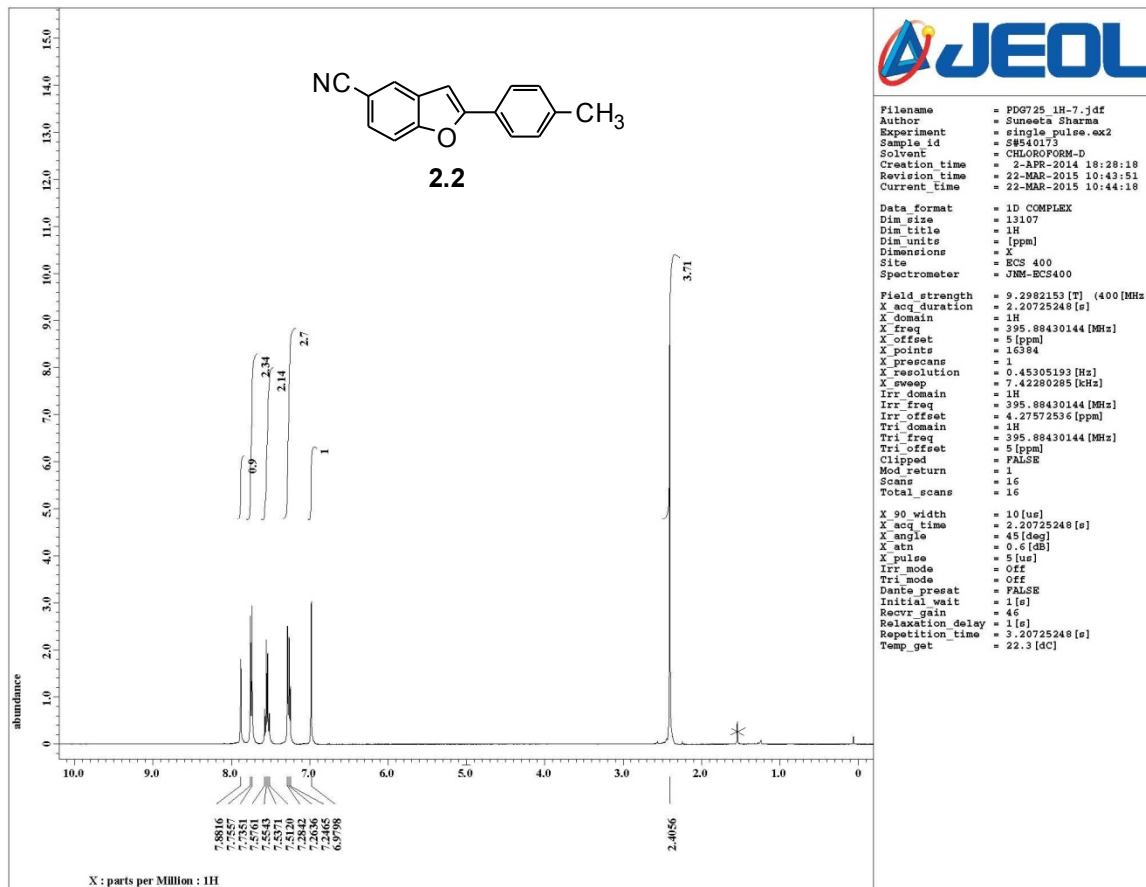

<sup>1</sup>H NMR (400 MHz, CDCl<sub>3</sub>) spectrum of **2.2**

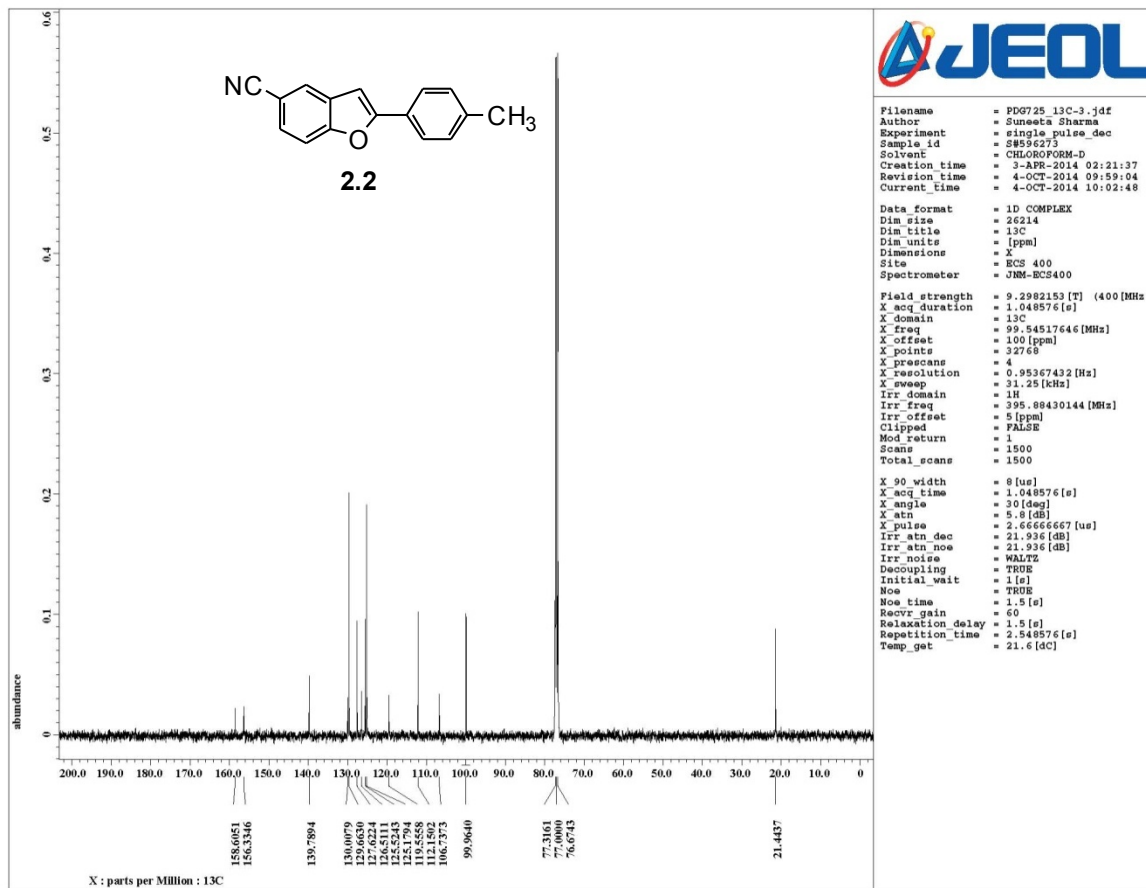

$^{13}\text{C}$  NMR (100 MHz,  $\text{CDCl}_3$ ) spectrum of **2.2**

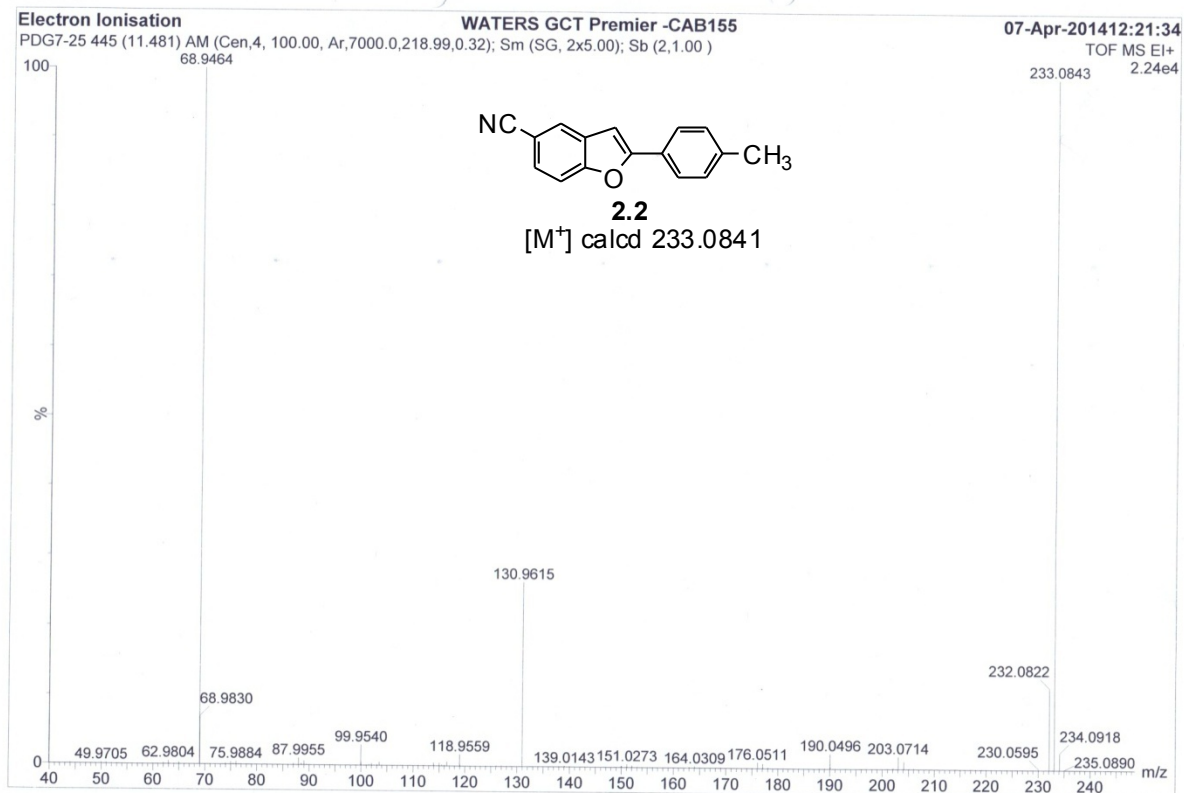

EI (HRMS) spectrum of **2.2**



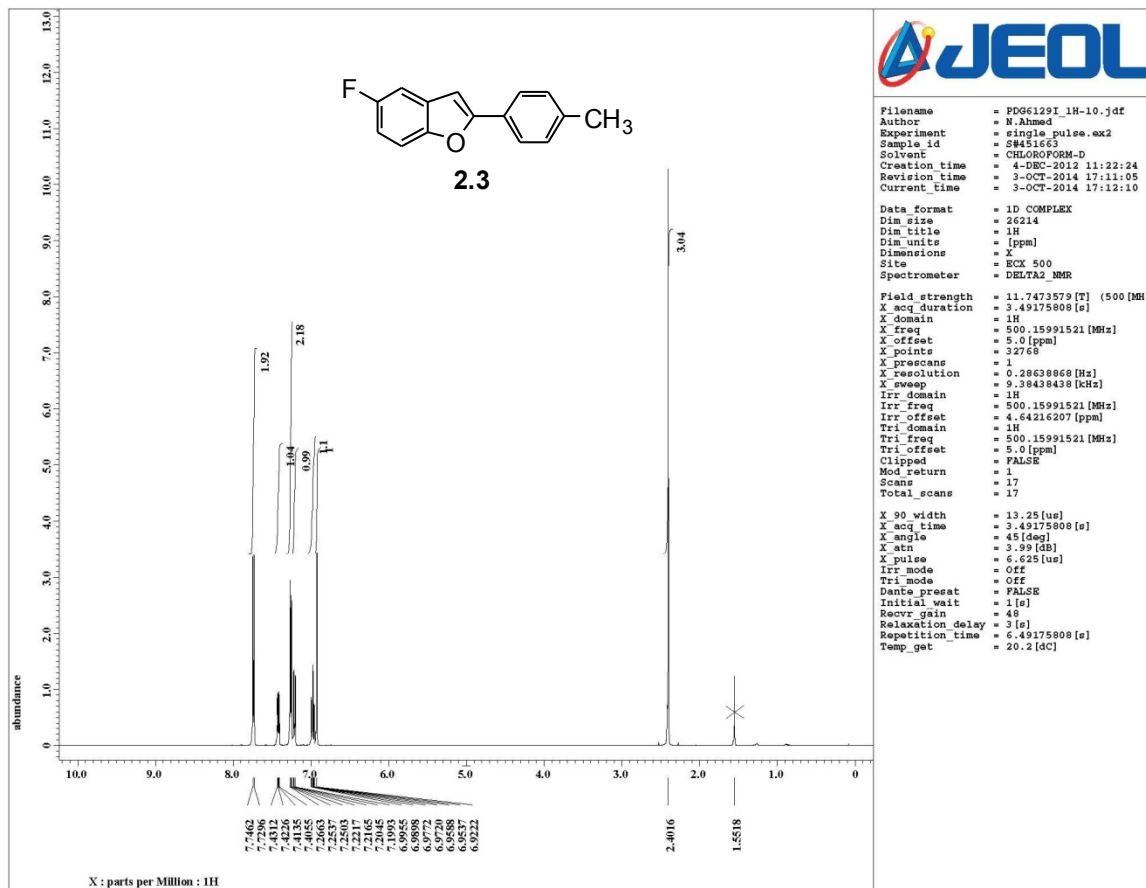

<sup>1</sup>H NMR (500 MHz, CDCl<sub>3</sub>) spectrum of **2.3**

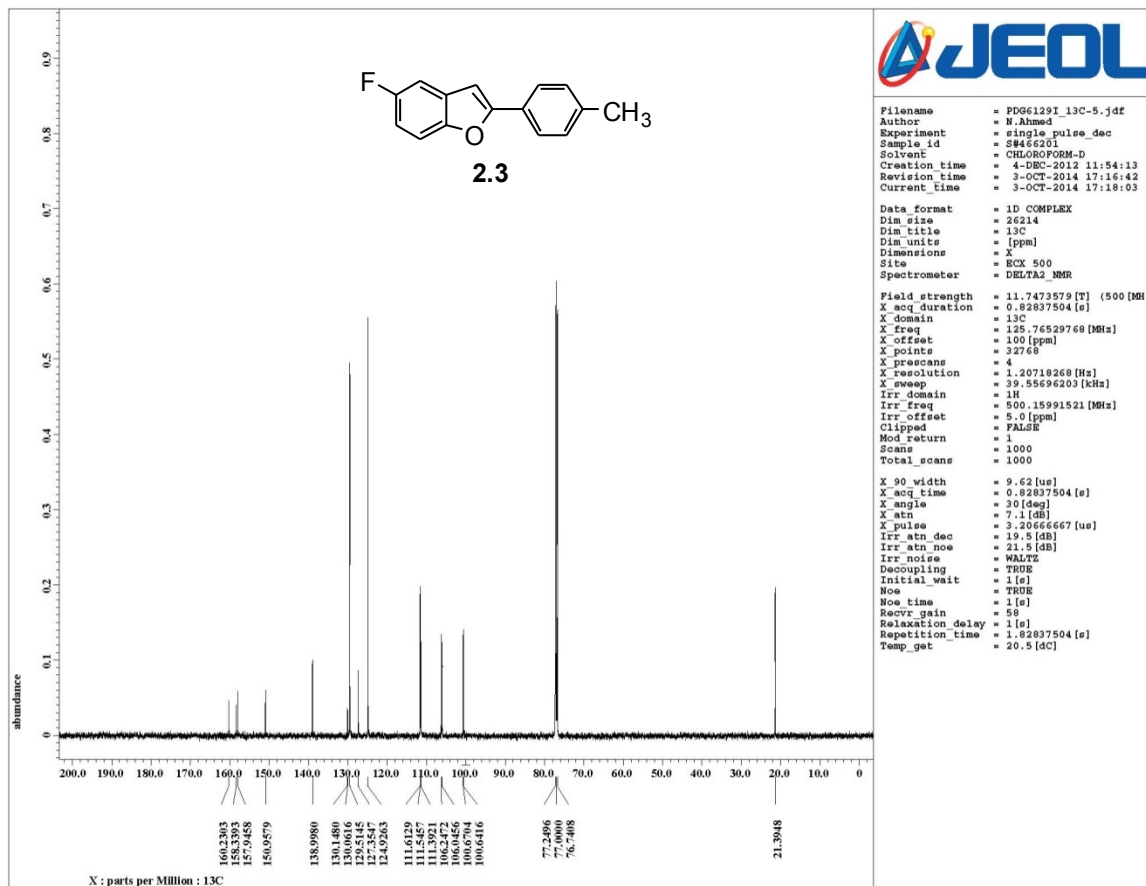

<sup>13</sup>C NMR (125 MHz, CDCl<sub>3</sub>) spectrum of **2.3**

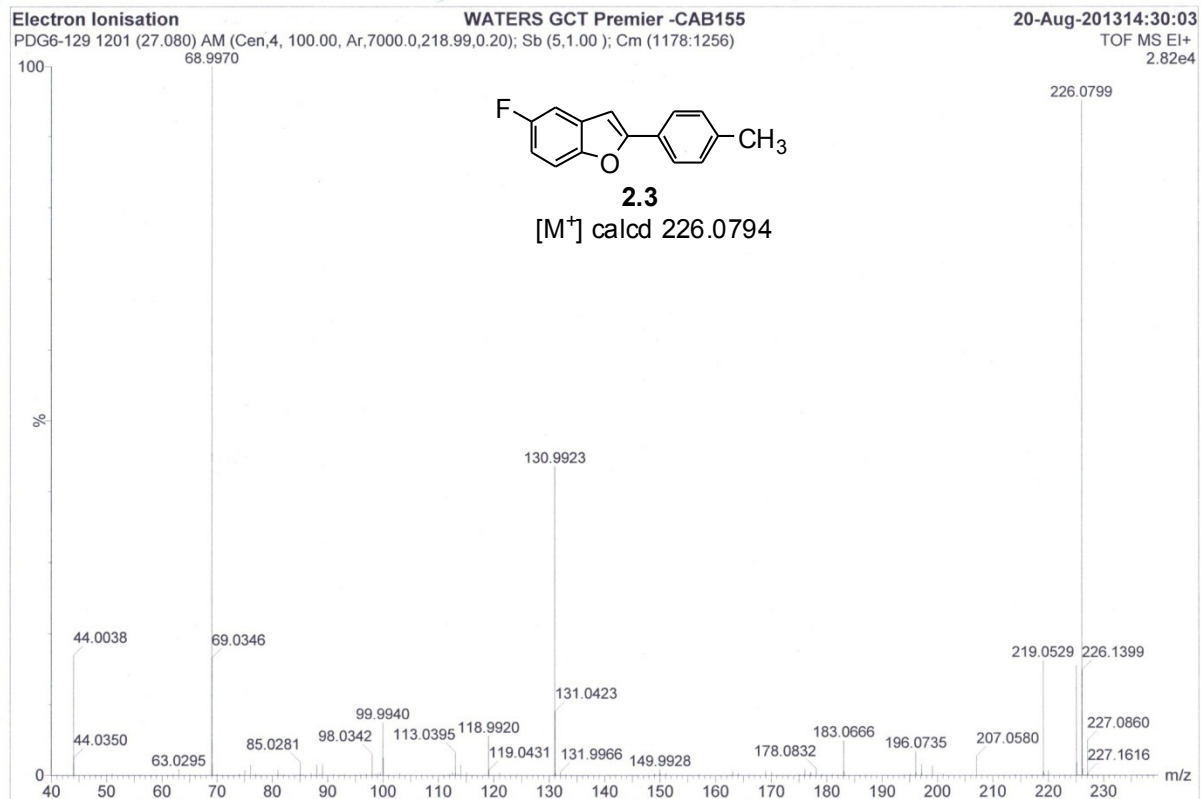

EI (HRMS) spectrum of **2.3**

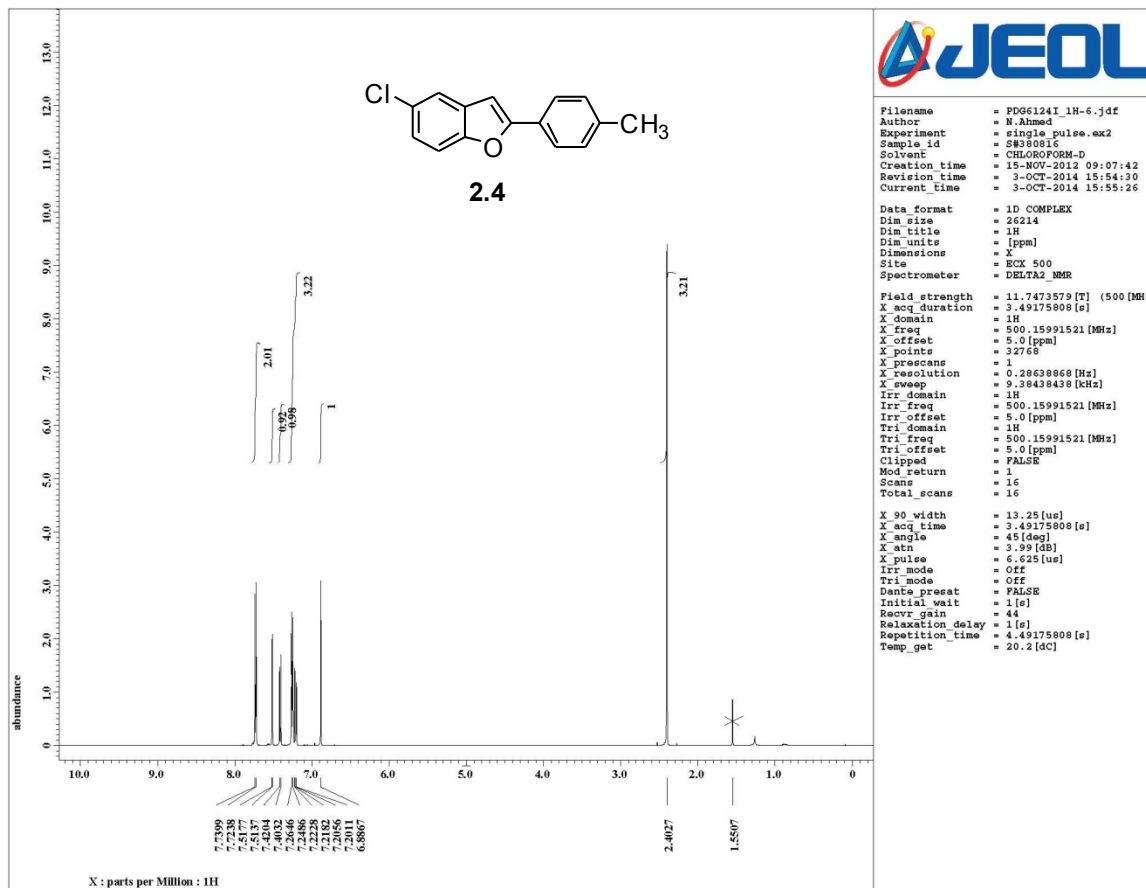

<sup>1</sup>H NMR (500 MHz, CDCl<sub>3</sub>) spectrum of **2.4**

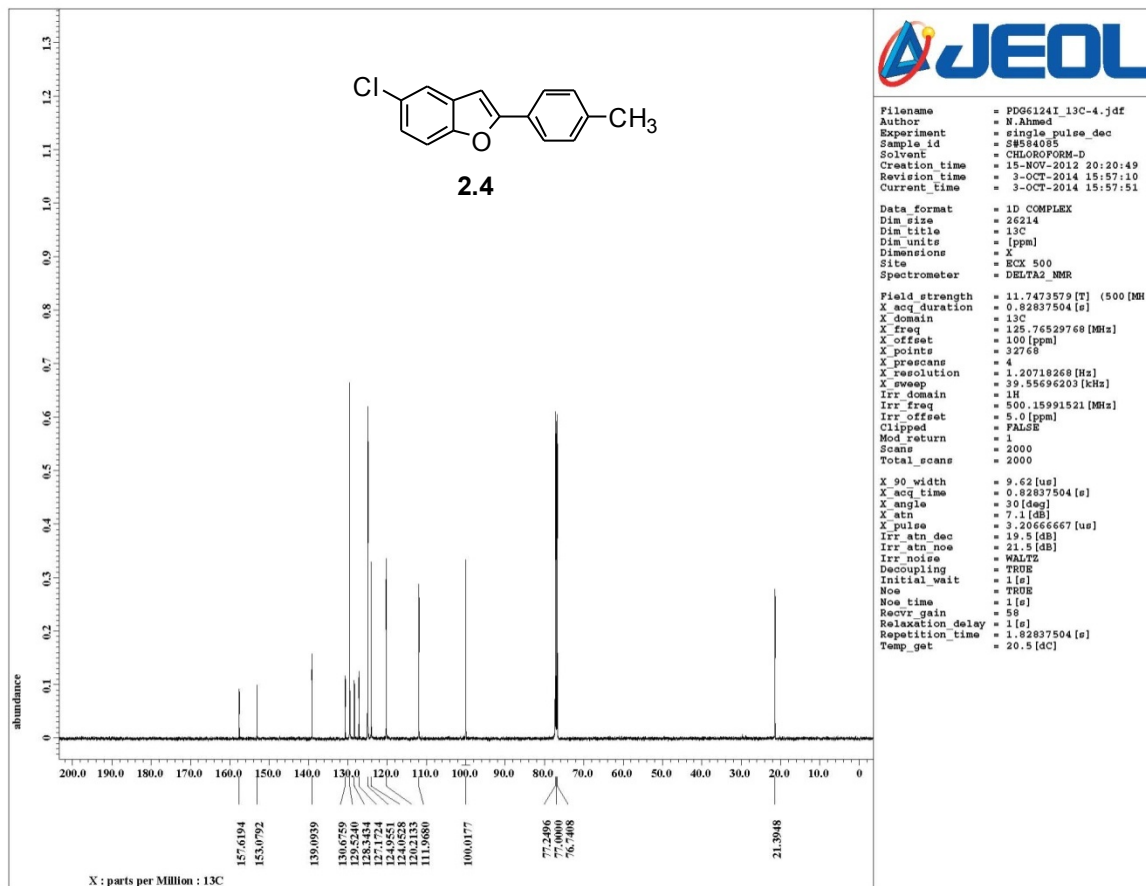

<sup>13</sup>C NMR (125 MHz, CDCl<sub>3</sub>) spectrum of **2.4**

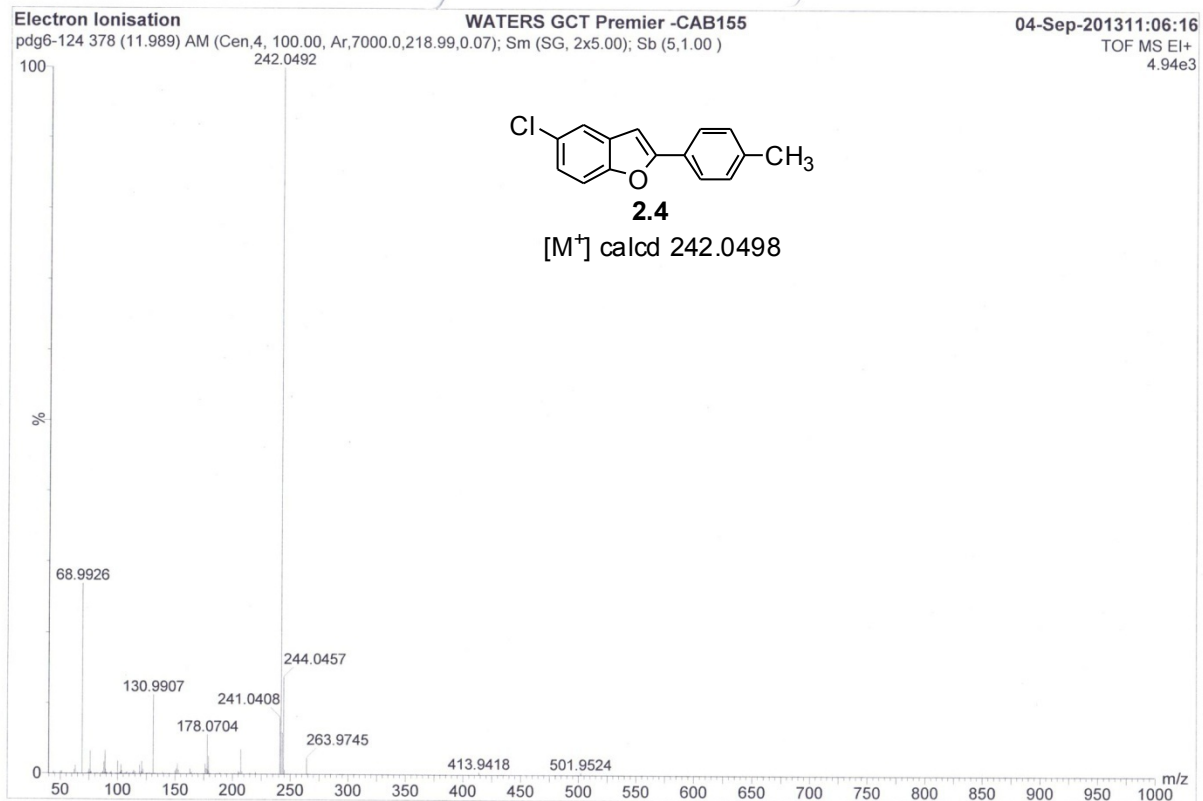

EI (HRMS) spectrum of **2.4**

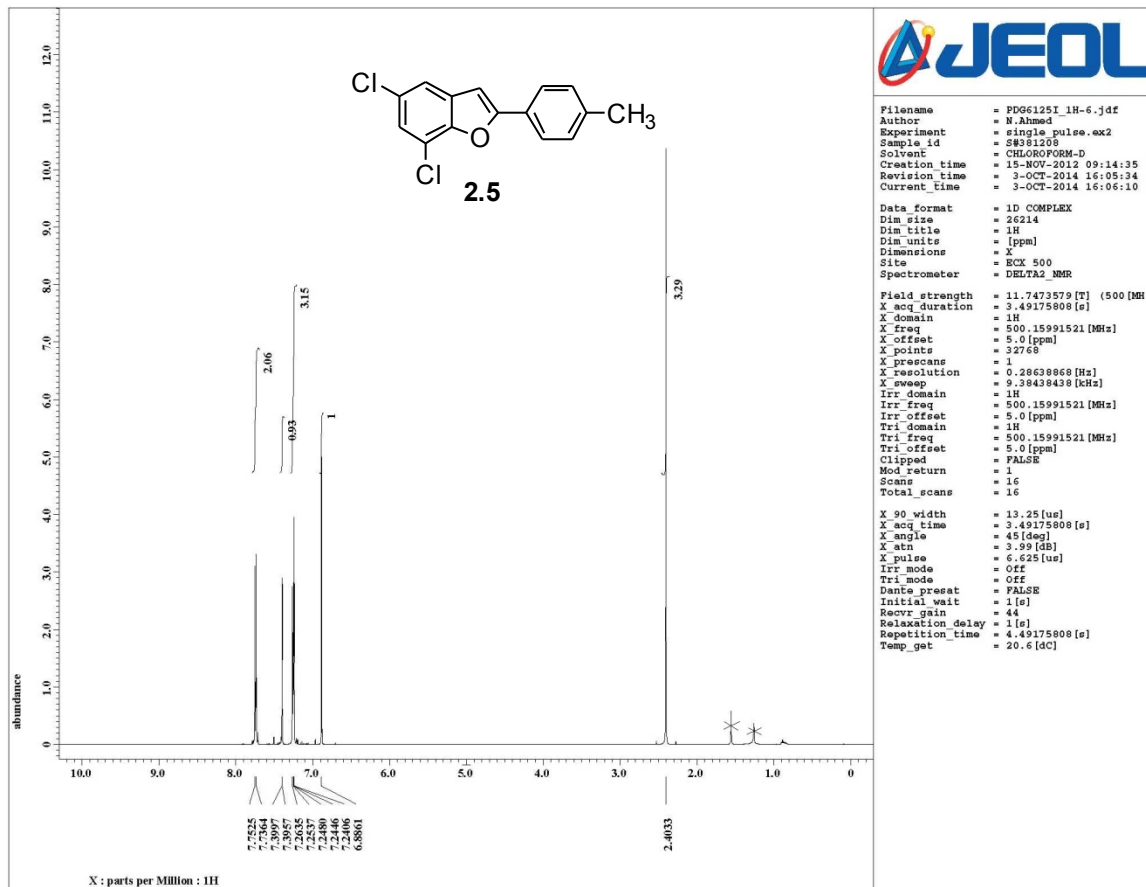

<sup>1</sup>H NMR (500 MHz, CDCl<sub>3</sub>) spectrum of **2.5**

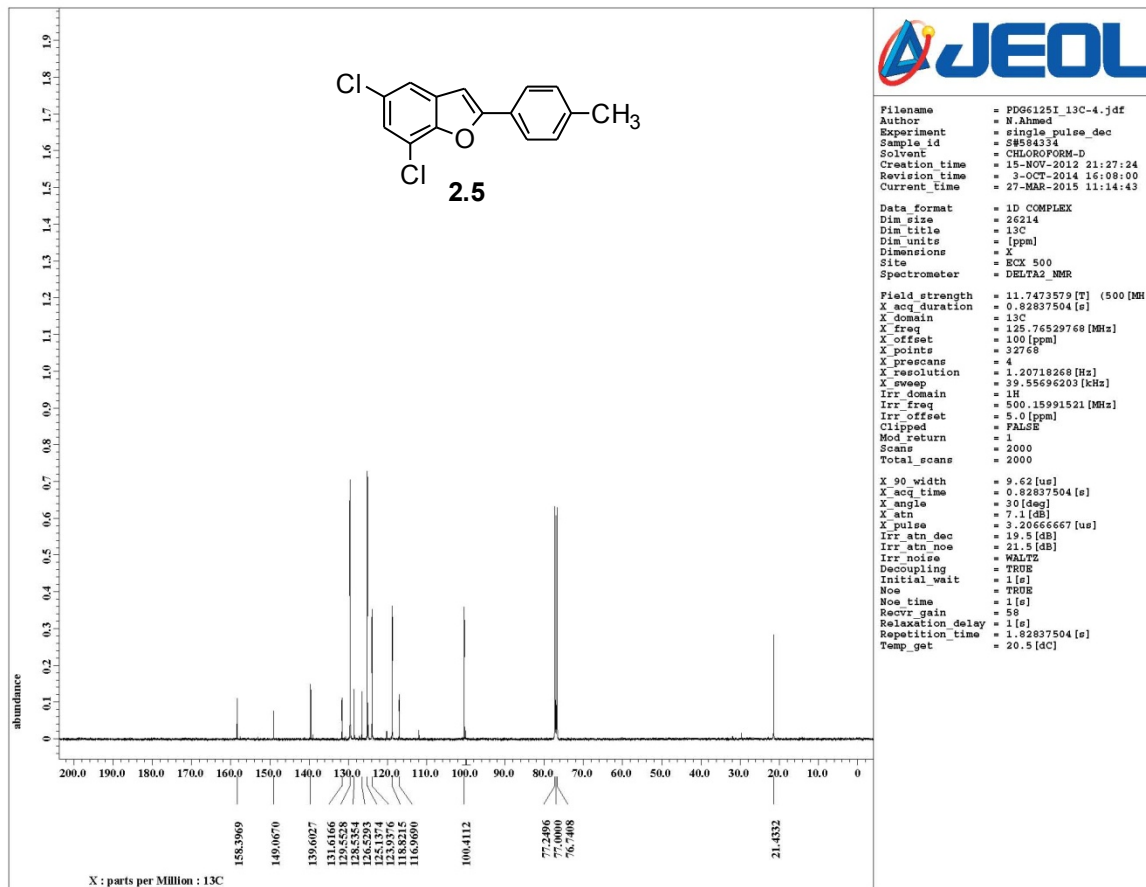

$^{13}\text{C}$  NMR (125 MHz,  $\text{CDCl}_3$ ) spectrum of **2.5**



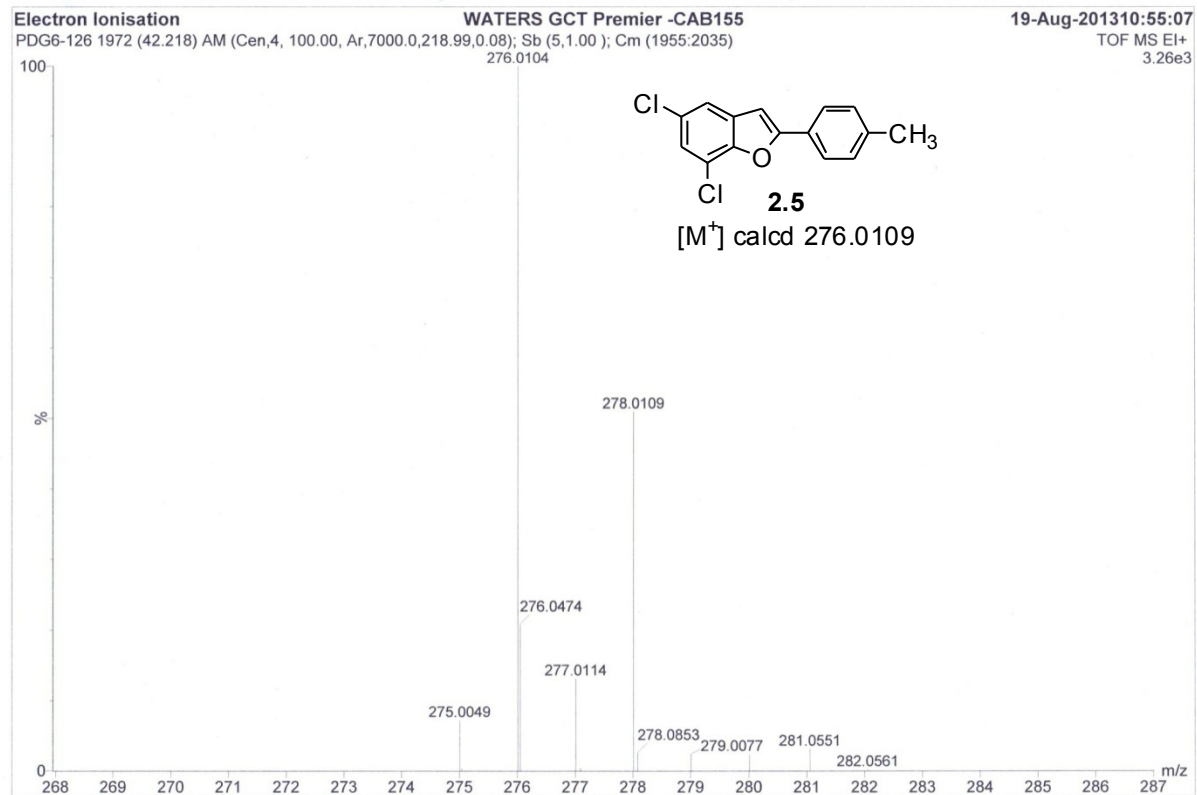

EI (HRMS) spectrum of **2.5**

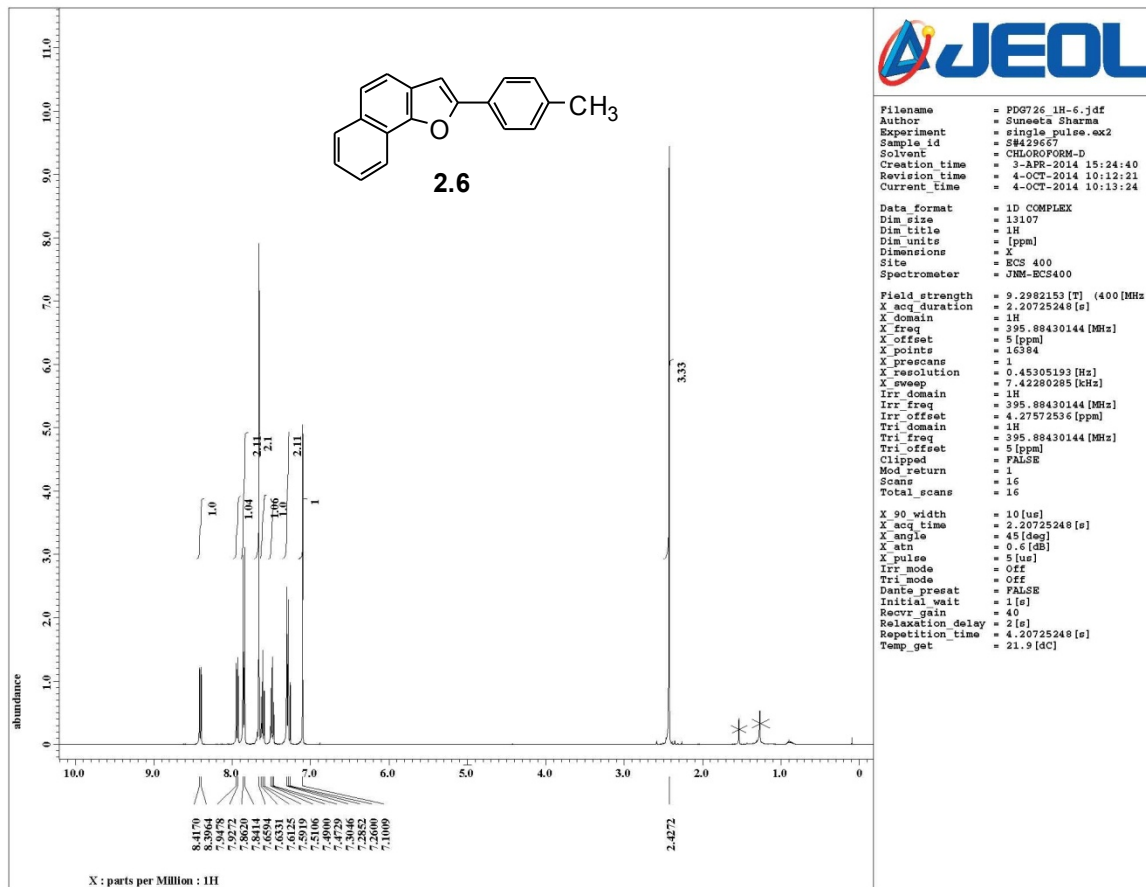

$^1\text{H}$  NMR (400 MHz,  $\text{CDCl}_3$ ) spectrum of **2.6**

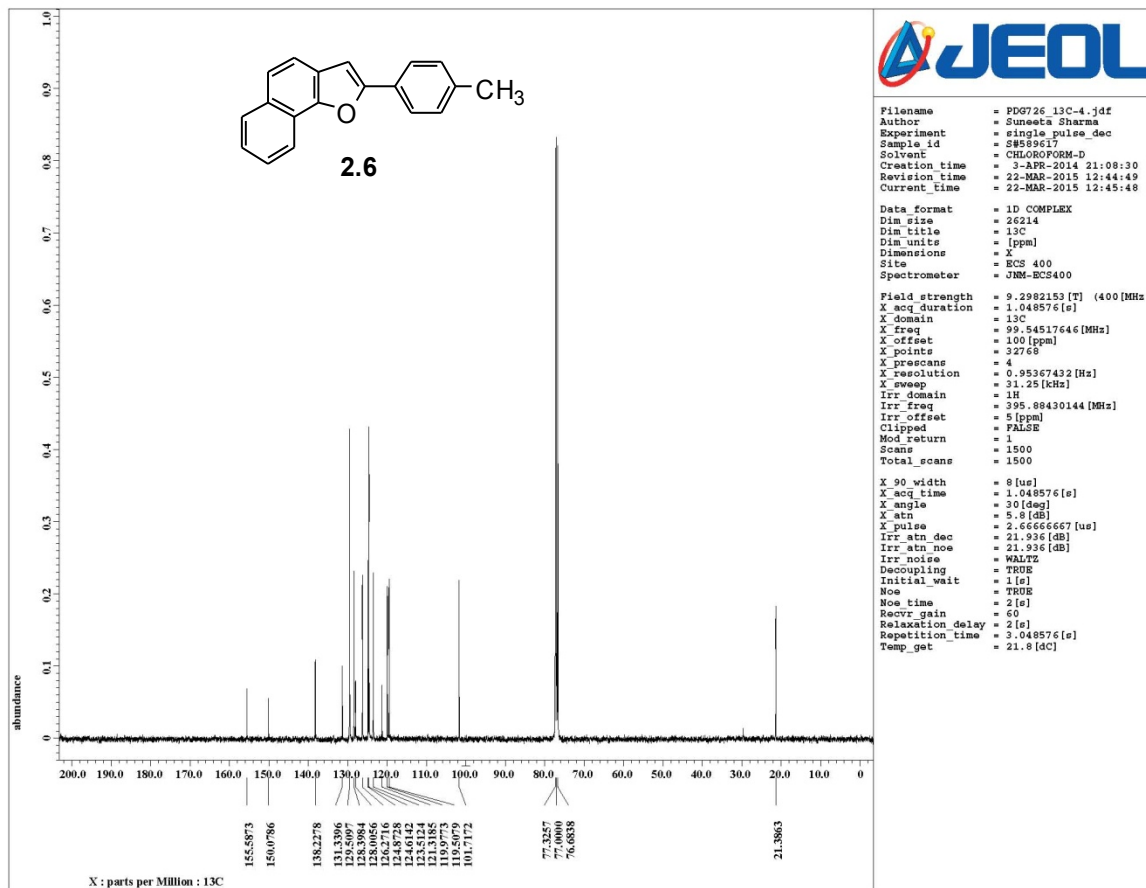

<sup>13</sup>C NMR (100 MHz, CDCl<sub>3</sub>) spectrum of 2.6

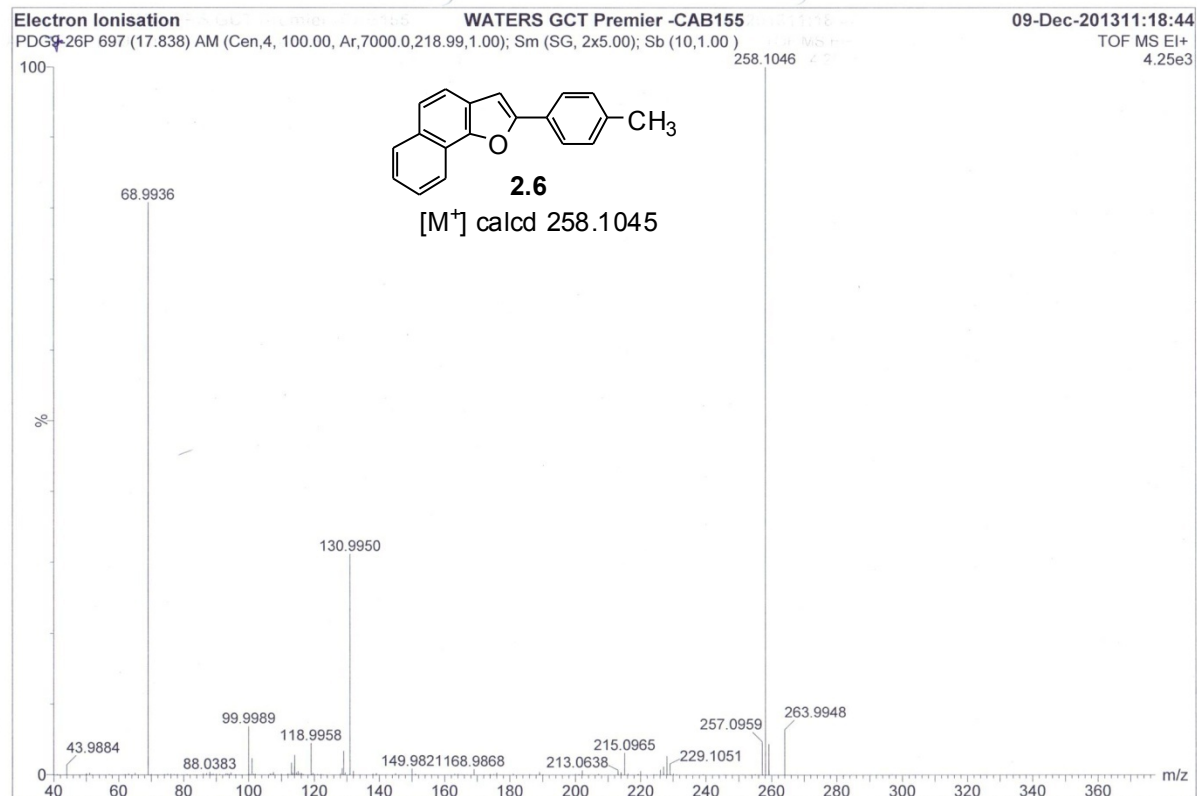

EI (HRMS) spectrum of **2.6**

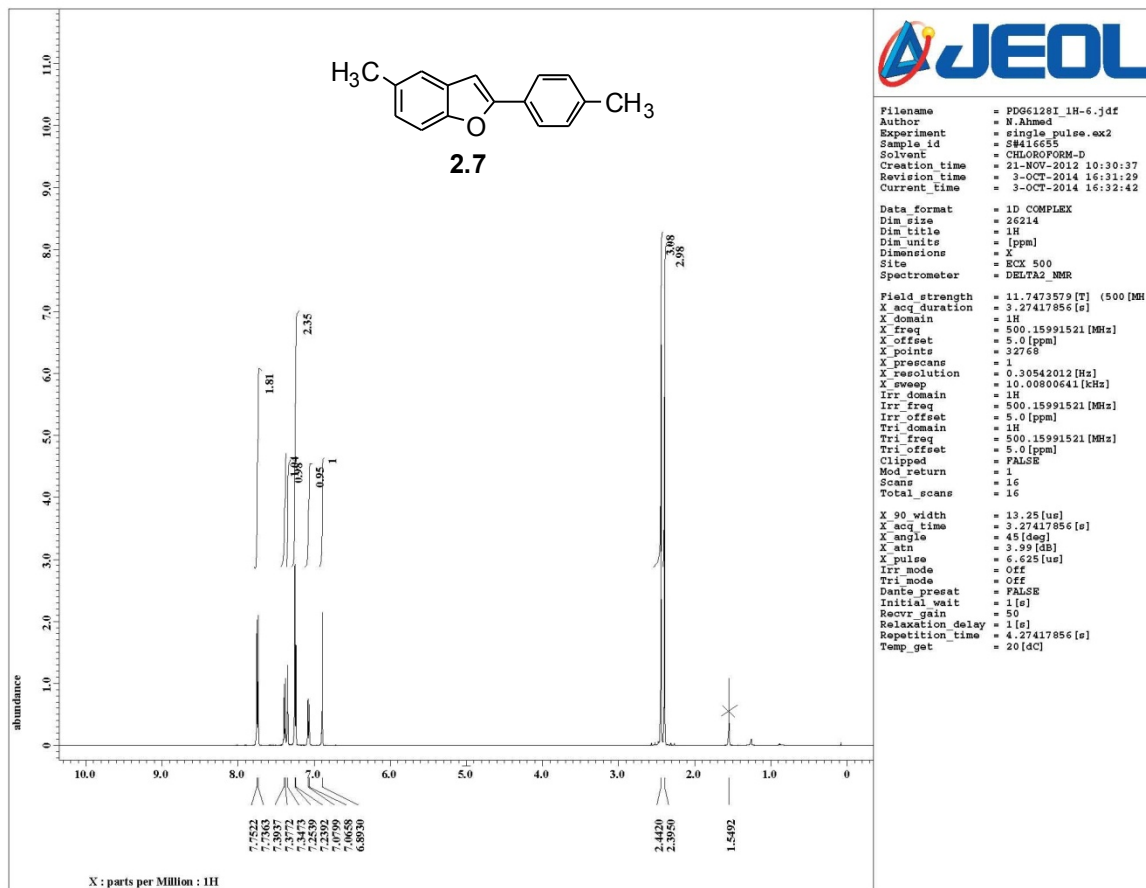

<sup>1</sup>H NMR (500 MHz, CDCl<sub>3</sub>) spectrum of 2.7

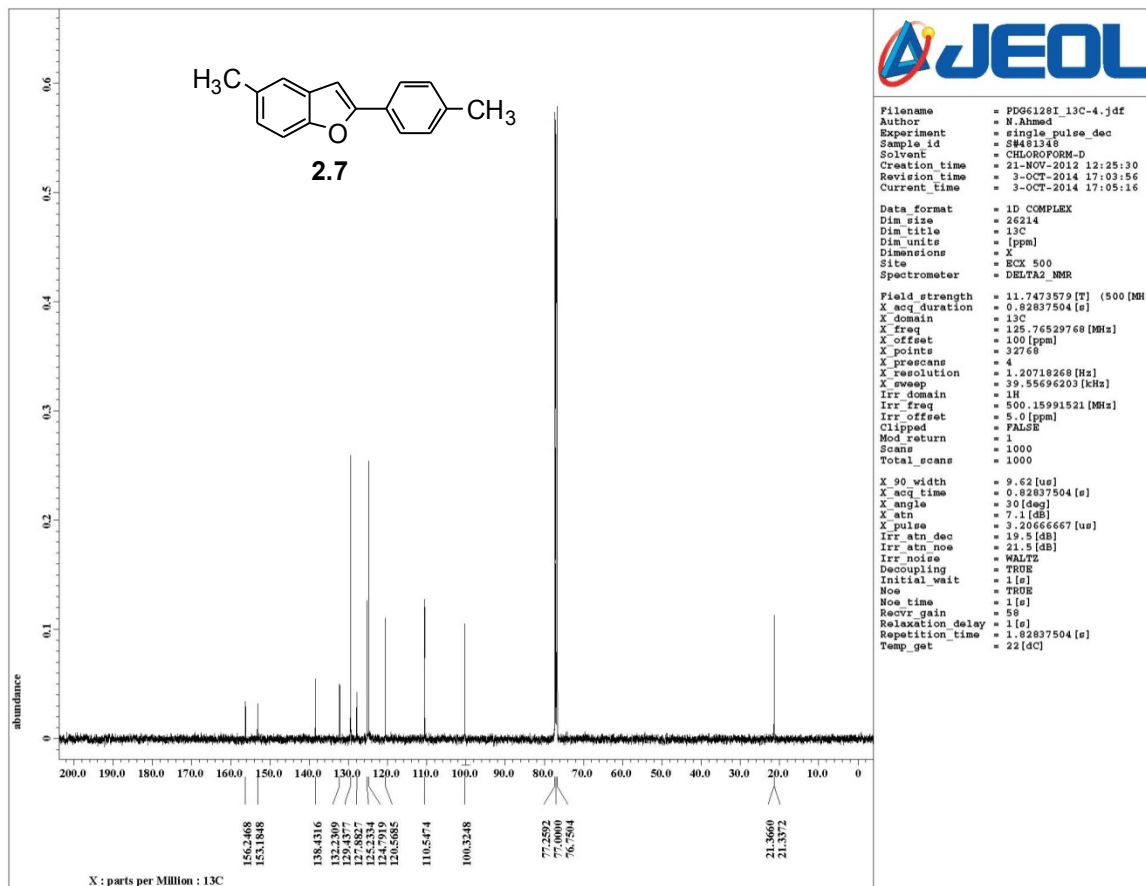

$^{13}\text{C}$  NMR (125 MHz,  $\text{CDCl}_3$ ) spectrum of **2.7**

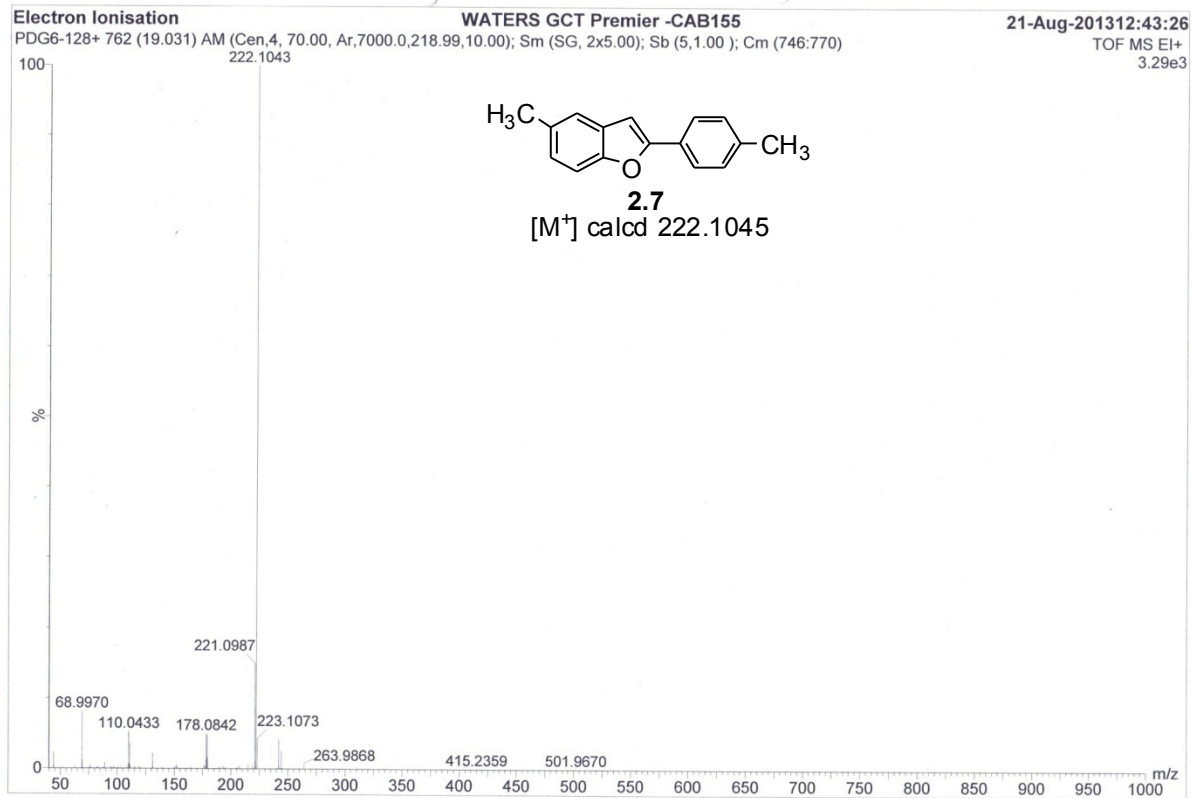

EI (HRMS) spectrum of **2.7**

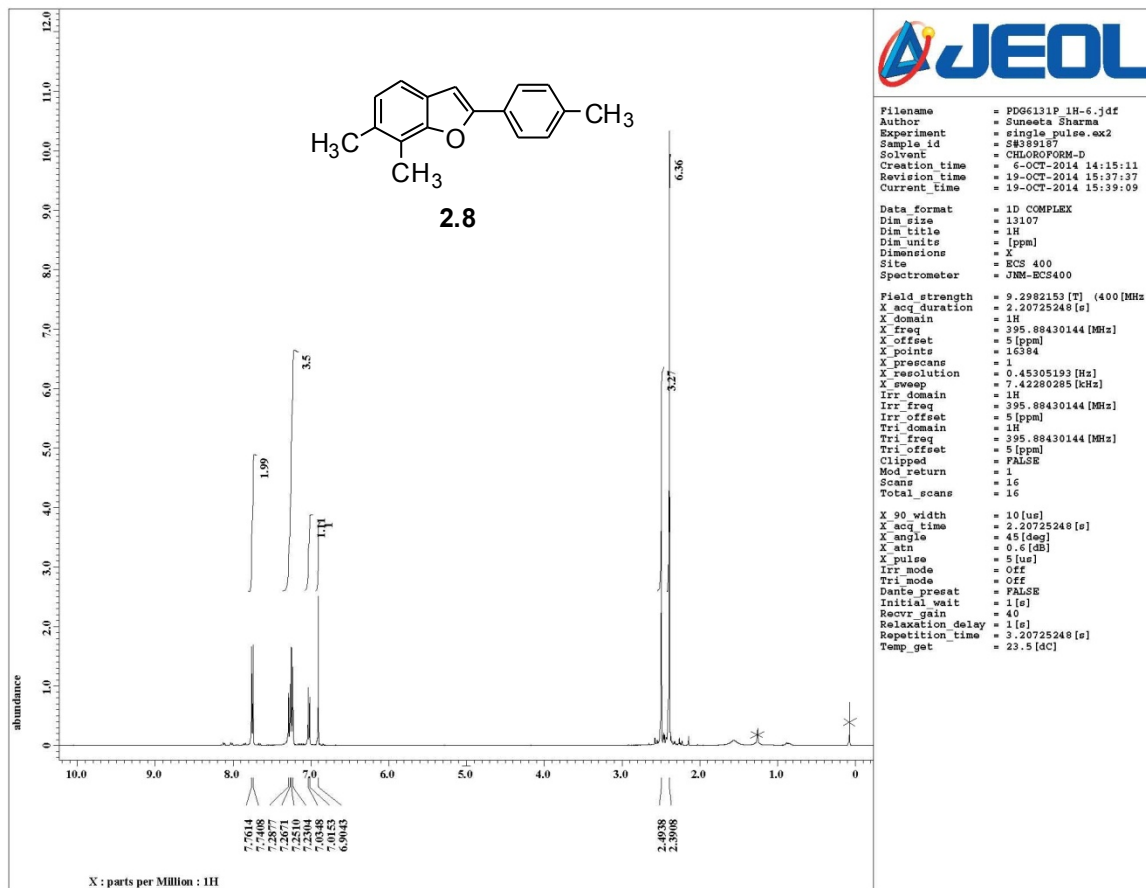

$^1\text{H}$  NMR (400 MHz,  $\text{CDCl}_3$ ) spectrum of **2.8**



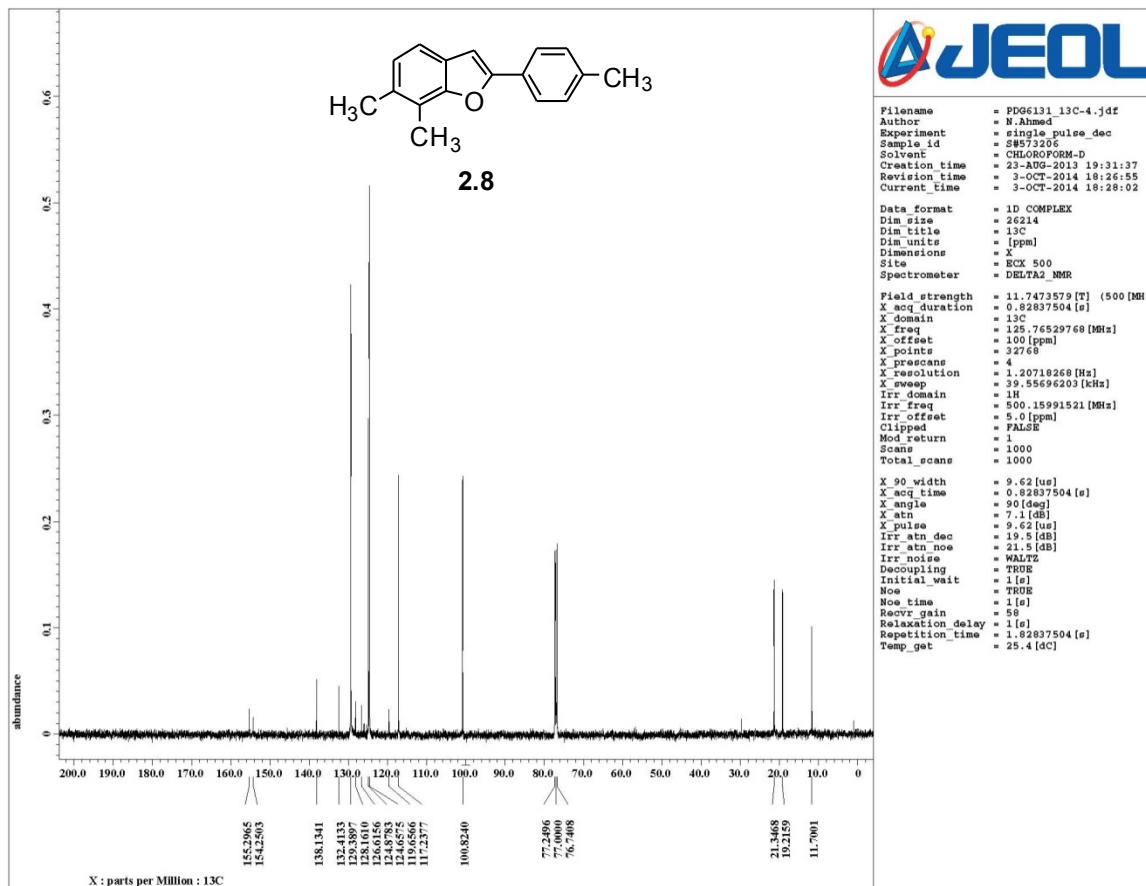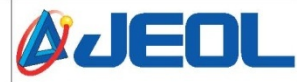

```

Filename      = PDG6131_13C-4.jdf
Author       = N.Ahmed
Experiment   = single_pulse_dec
Sample_id    = S4573256
Solvent      = CHLOROPFORM-D
Creation time = 23-AUG-2013 19:31:37
Revision time = 3-OCT-2014 18:26:55
Current_time = 3-OCT-2014 18:28:02

Data format  = 1D_COMPLEX
Dim_size     = 26214
Dim_title    = 13C
Dim_units    = [ppm]
Dimensions   = X
Site         = ECX 500
Spectrometer = DELTA2 NMR

Field strength = 11.7473579 [T] (500 [MH]
X_acq_duration = 0.82837504 [s]
X_domain       = 13C
X_freq         = 125.76529768 [MHz]
X_offset       = 100 [ppm]
X_points       = 32768
X_prescans     = 4
X_resolution   = 1.20718268 [Hz]
X_sweep        = 39.55696203 [kHz]
Irr_domain     = 1H
Irr_freq       = 500.15991521 [MHz]
Irr_offset     = 5.0 [ppm]
Clipped        = FALSE
Mod_return     = 1
Scans          = 1000
Total_scans    = 1000

X_90_width    = 9.62 [us]
X_acq_time    = 0.82837504 [s]
X_angle       = 90 [deg]
X_atn         = 7.1 [dB]
X_pulse       = 9.62 [us]
Irr_atn_dec   = 19.5 [dB]
Irr_atn_noe   = 21.5 [dB]
Irr_noise     = WALTZ
Decoupling    = TROE
Initial_wait  = 1 [s]
Noe           = TROE
Noe_time      = 1 [s]
Recvr_gain    = 58
Relaxation_delay = 1 [s]
Repetition_time = 1.82837504 [s]
Temp_get      = 25.4 [dC]

```

<sup>13</sup>C NMR (125 MHz, CDCl<sub>3</sub>) spectrum of **2.8**

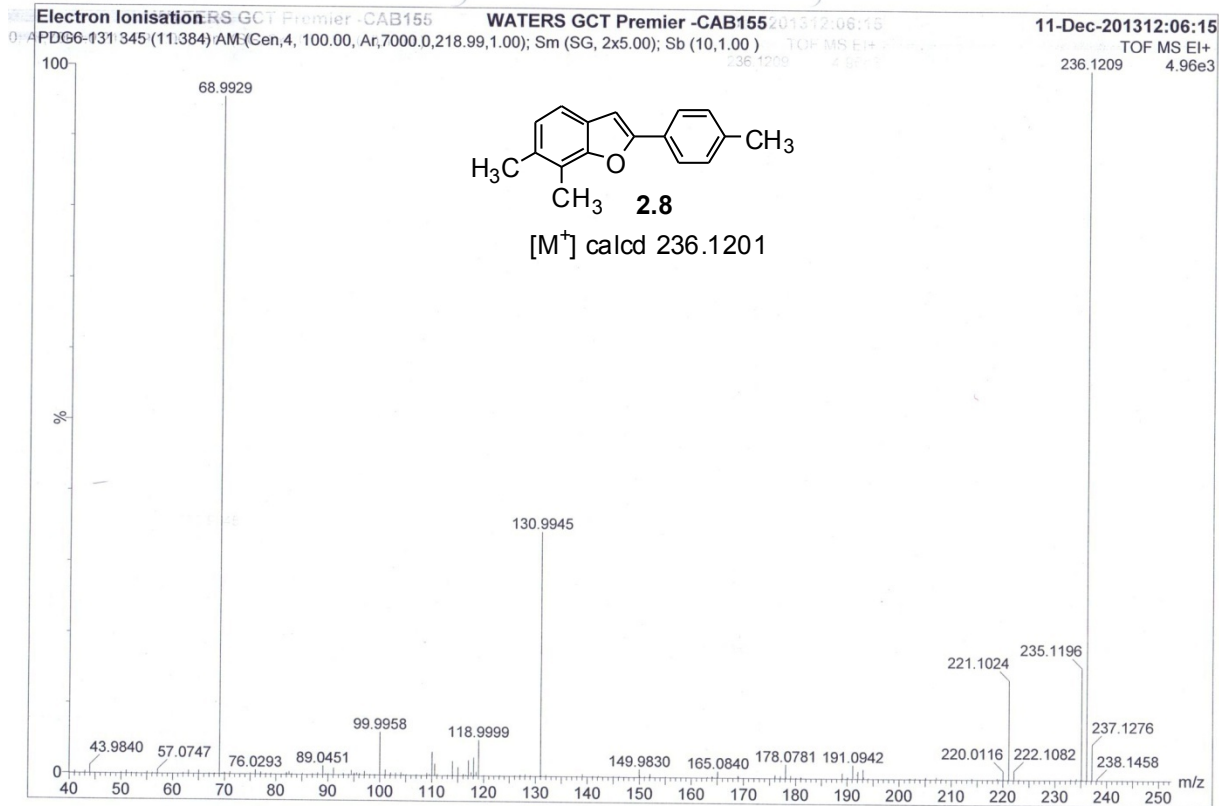

EI (HRMS) spectrum of **2.8**

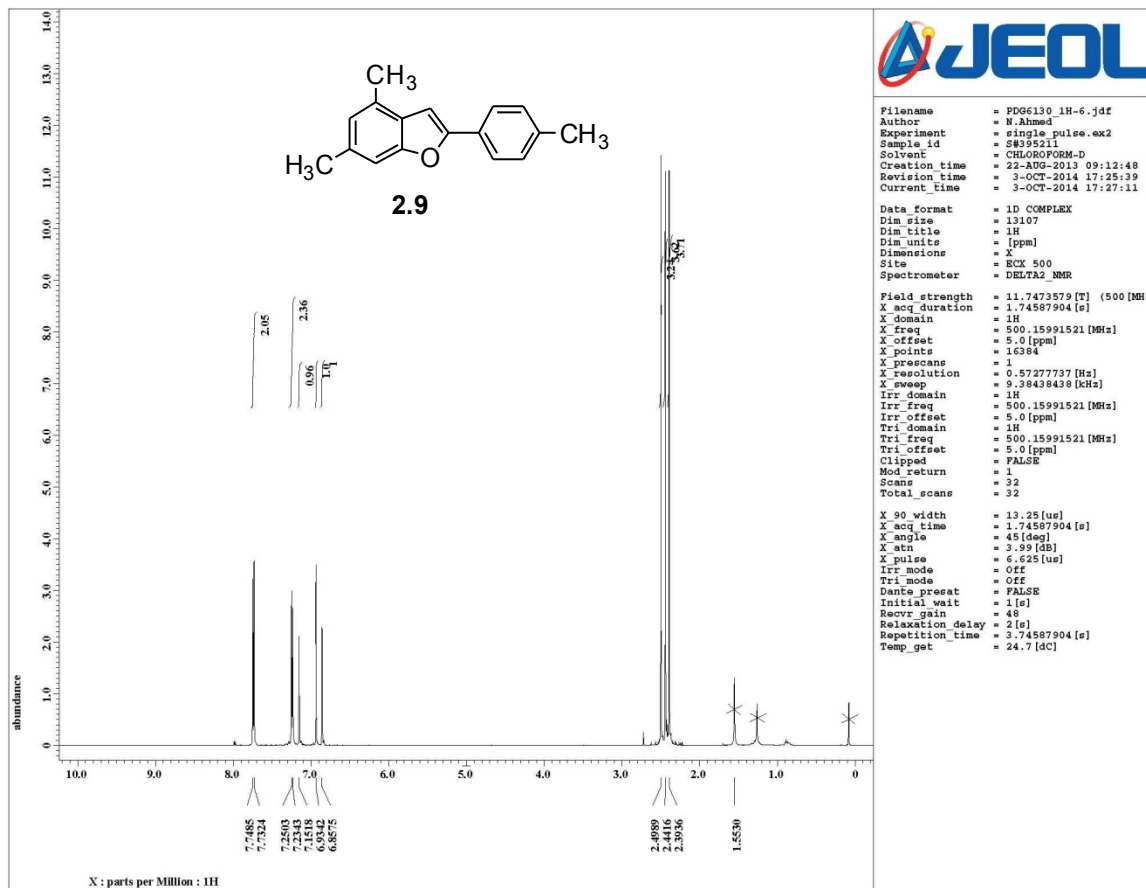

$^1\text{H}$  NMR (500 MHz,  $\text{CDCl}_3$ ) spectrum of **2.9**

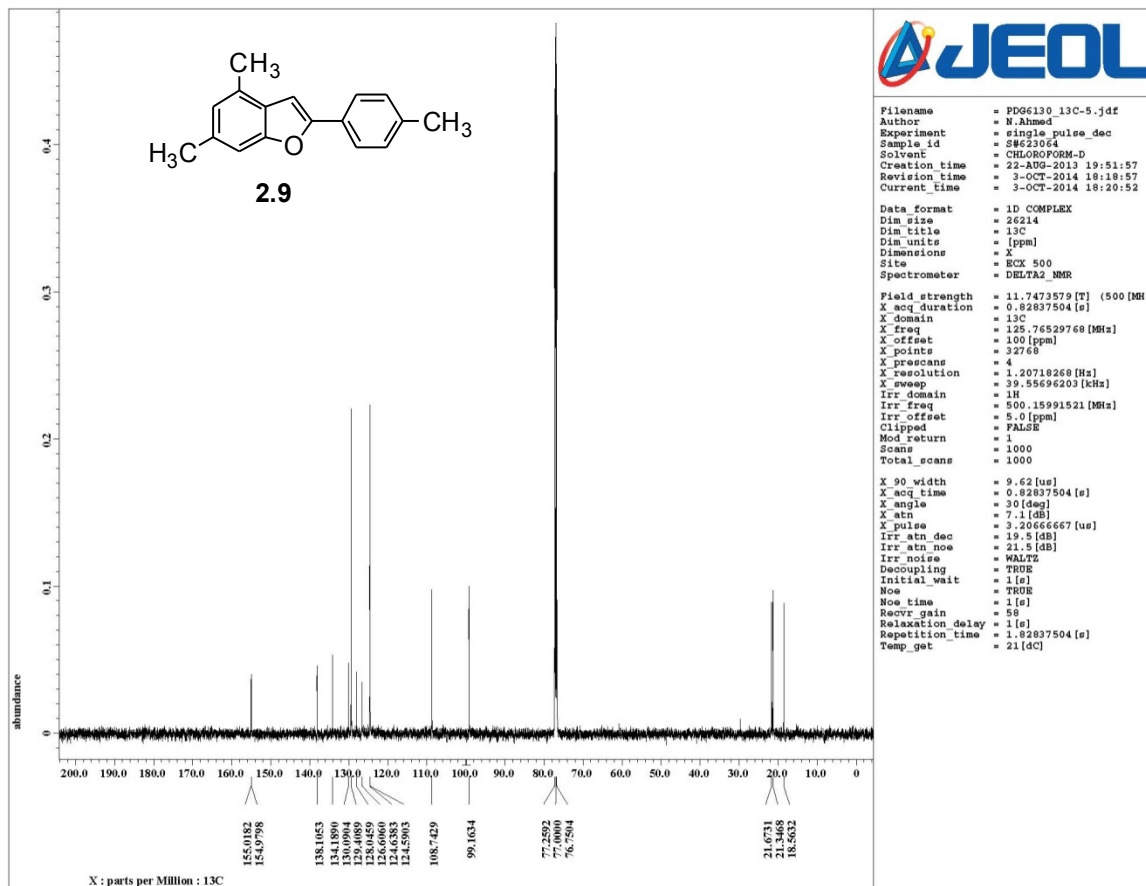

$^{13}\text{C}$  NMR (125 MHz,  $\text{CDCl}_3$ ) spectrum of **2.9**

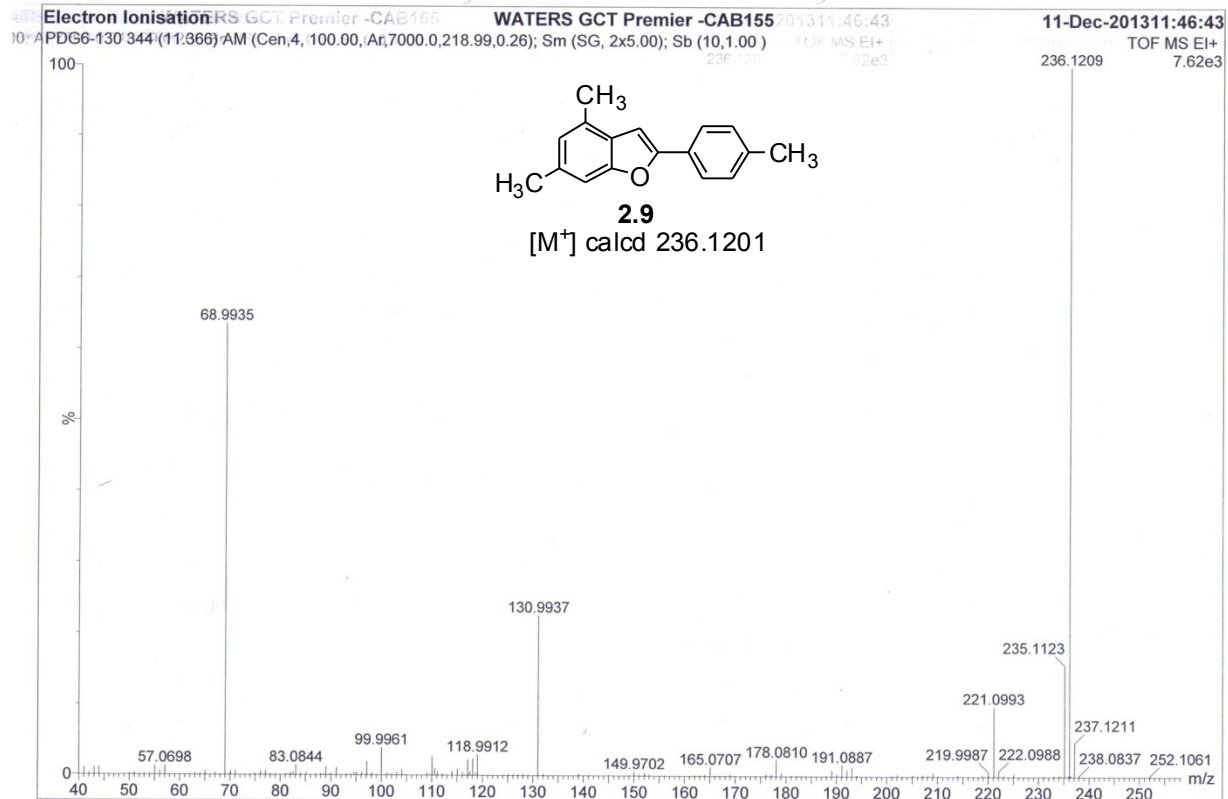

EI (HRMS) spectrum of **2.9**

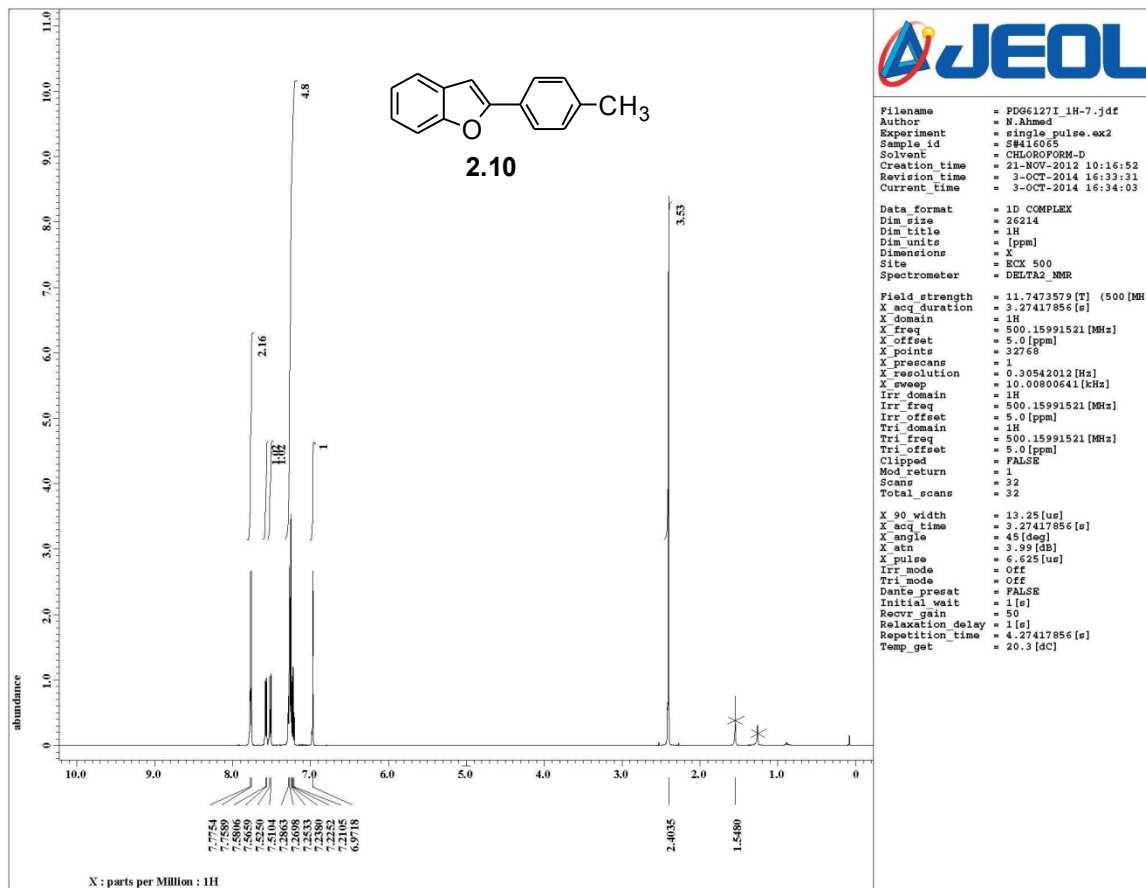

$^1\text{H}$  NMR (500 MHz,  $\text{CDCl}_3$ ) spectrum of **2.10**

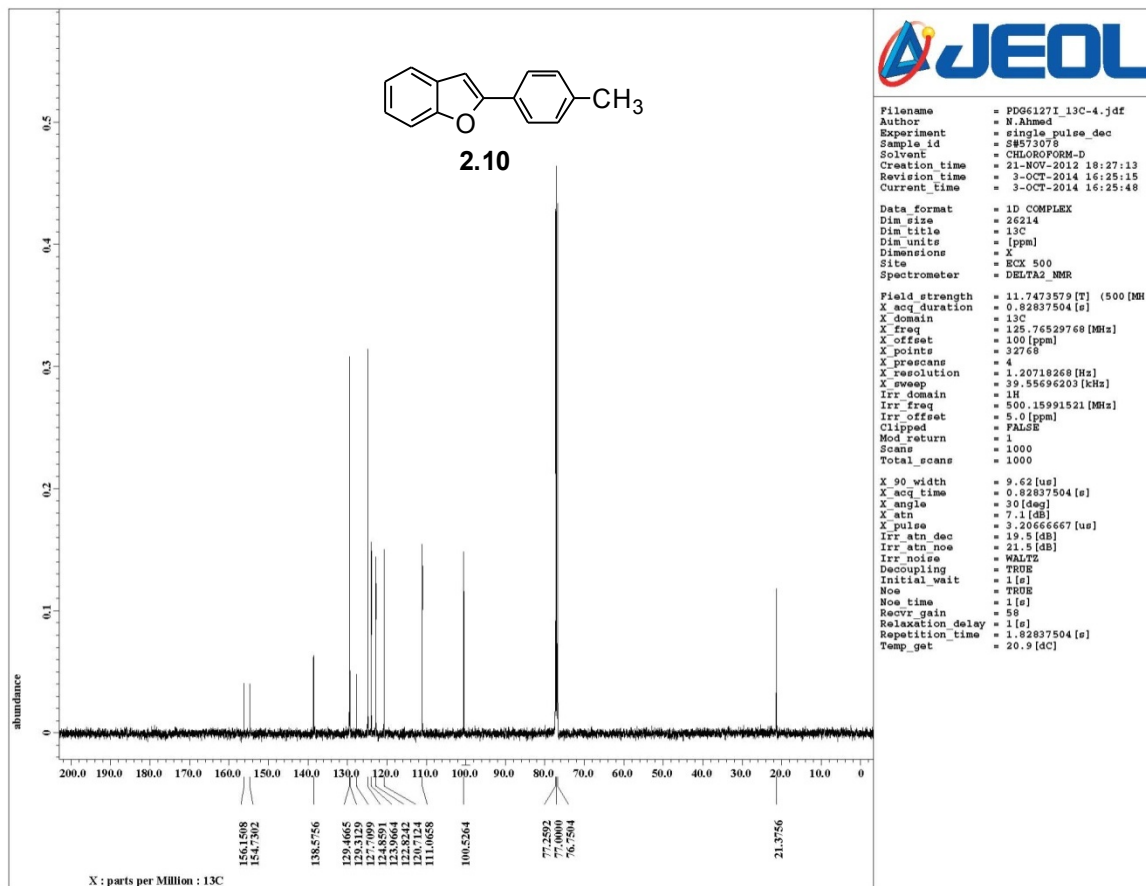

$^{13}\text{C}$  NMR (125 MHz,  $\text{CDCl}_3$ ) spectrum of **2.10**

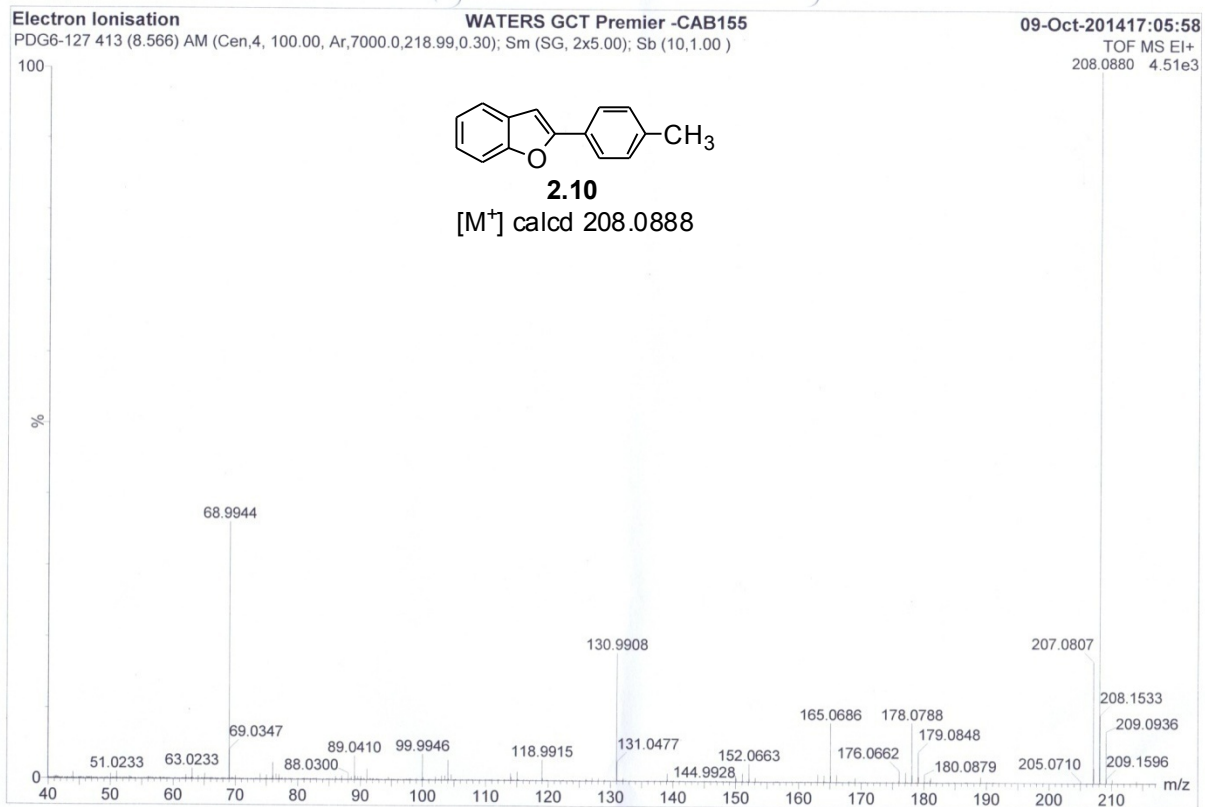

EI (HRMS) spectrum of **2.10**



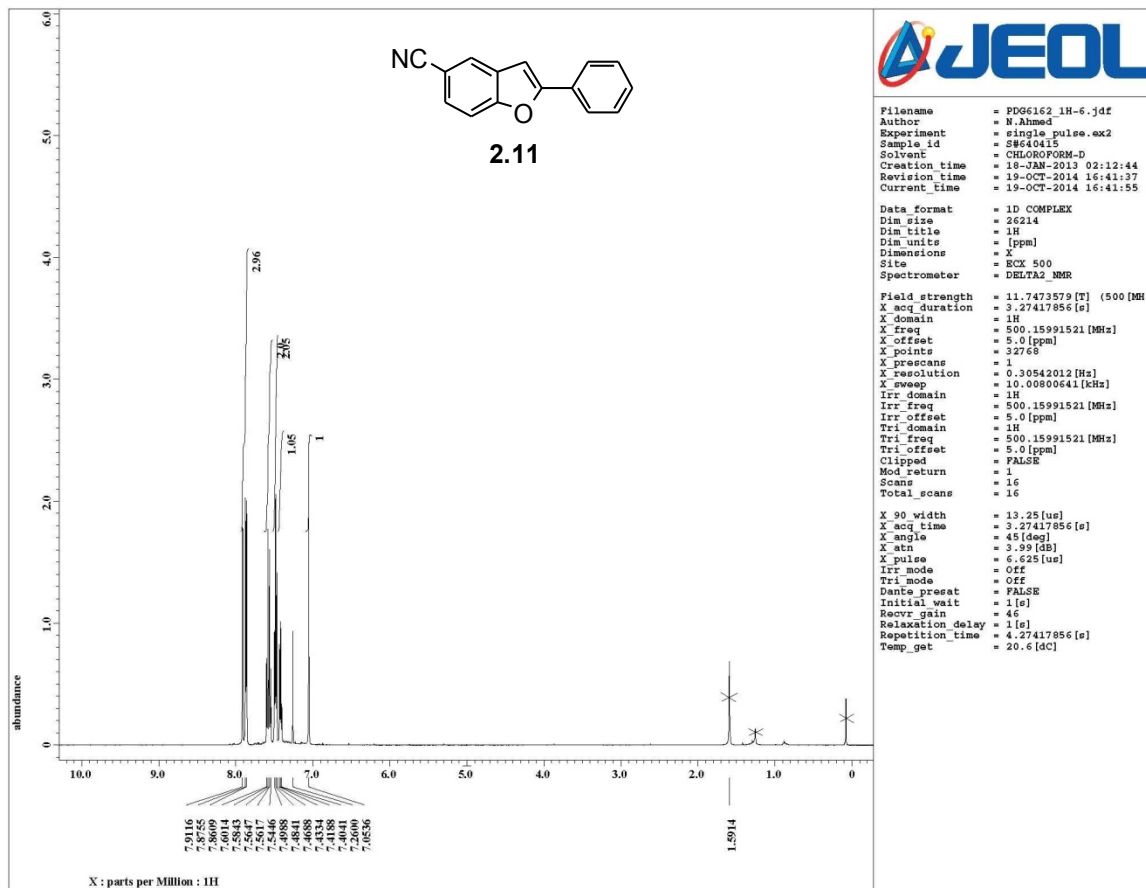

<sup>1</sup>H NMR (500 MHz, CDCl<sub>3</sub>) spectrum of **2.11**

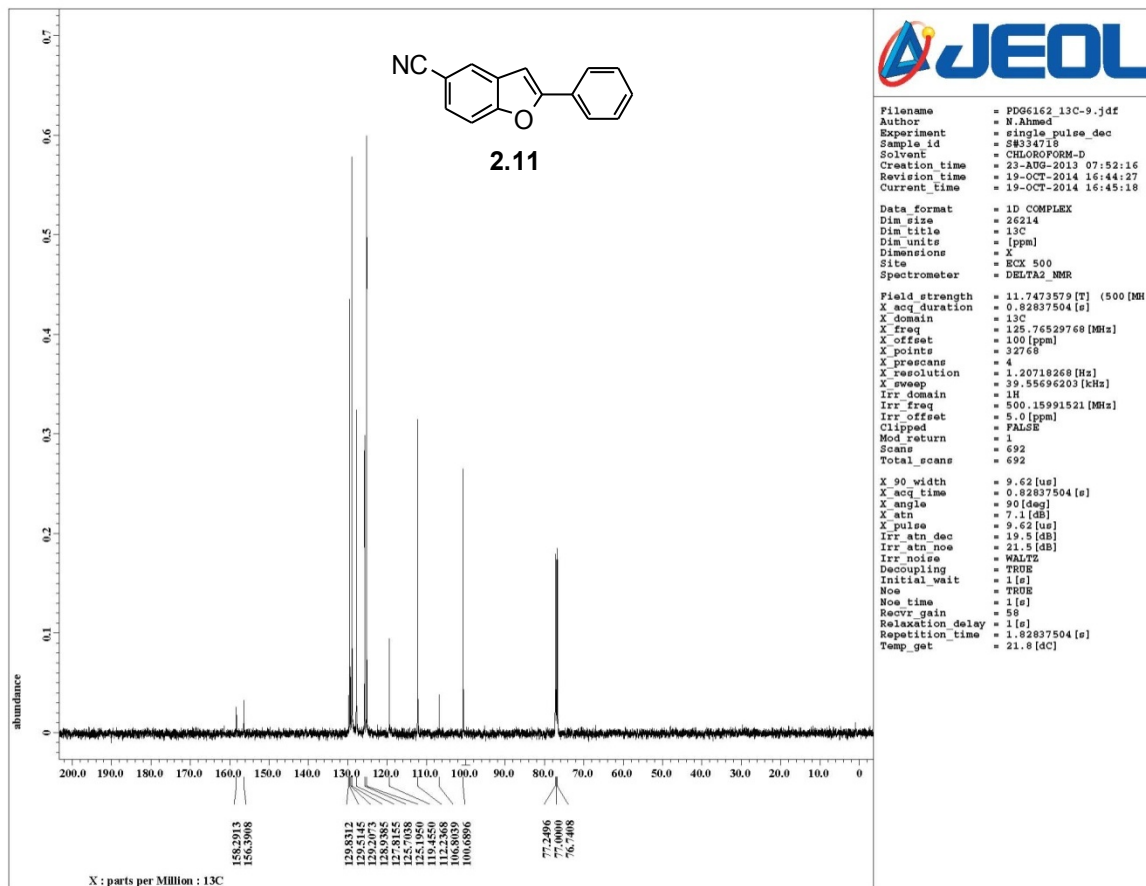

$^{13}\text{C}$  NMR (125 MHz,  $\text{CDCl}_3$ ) spectrum of **2.11**

Electrospray ionisation-MS

WATERS-Q-ToF Premier-HAB2 .J

15:05:2716-Aug-2013

PDG6-162 13 (0.277) AM (Cen,4, 100.00, Ar,8500.0,556.28,0.11,LS 10); Sm (SG, 2x5.00); Sb (10,1.00); Cm (10:22-47:53) 1: TOF MSMS 220.08ES+  
1.25e3

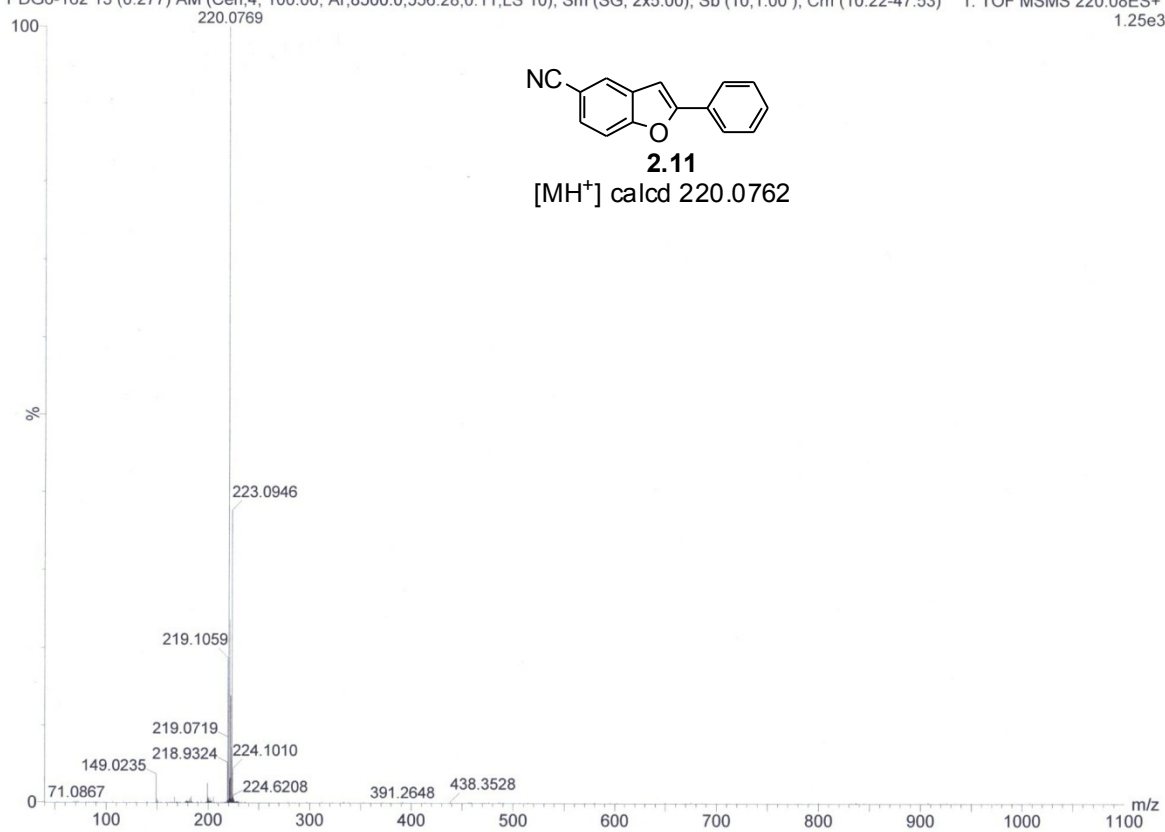

ESI (HRMS) spectrum of **2.11**

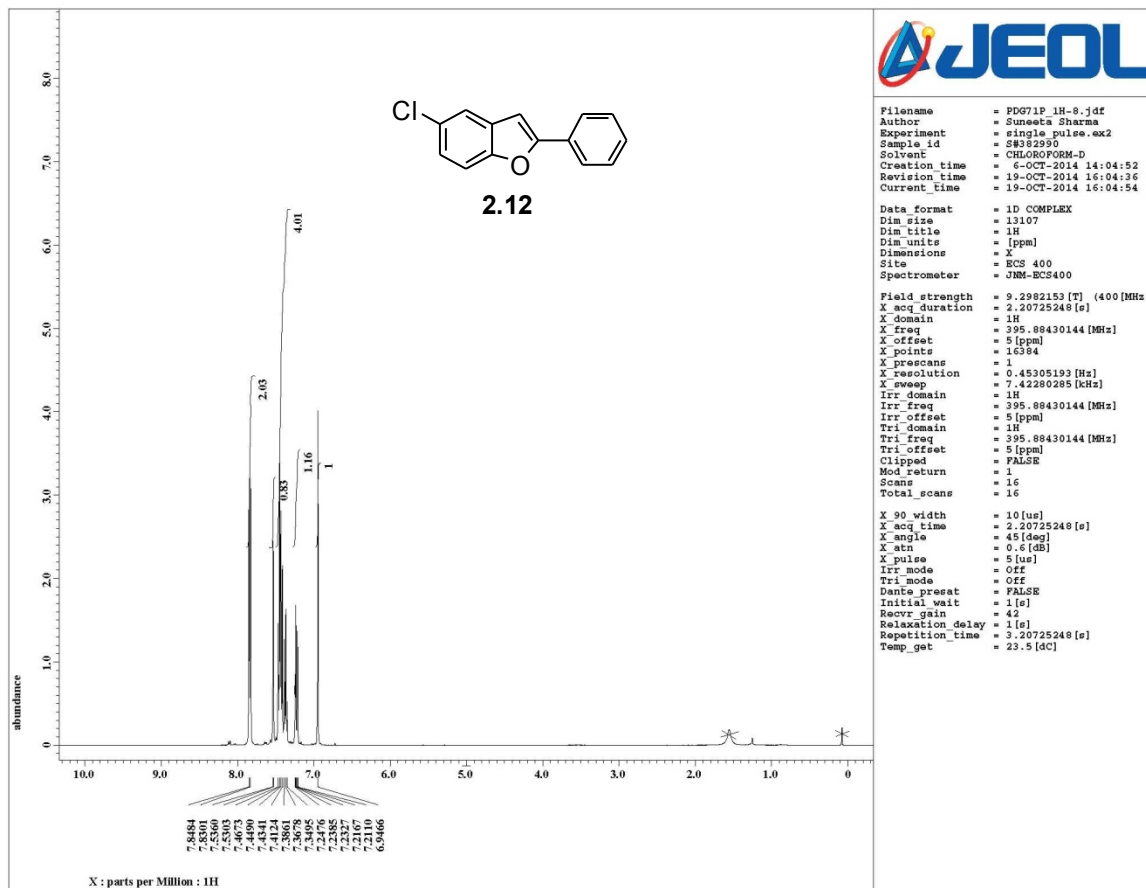

$^1\text{H}$  NMR (400 MHz,  $\text{CDCl}_3$ ) spectrum of **2.12**

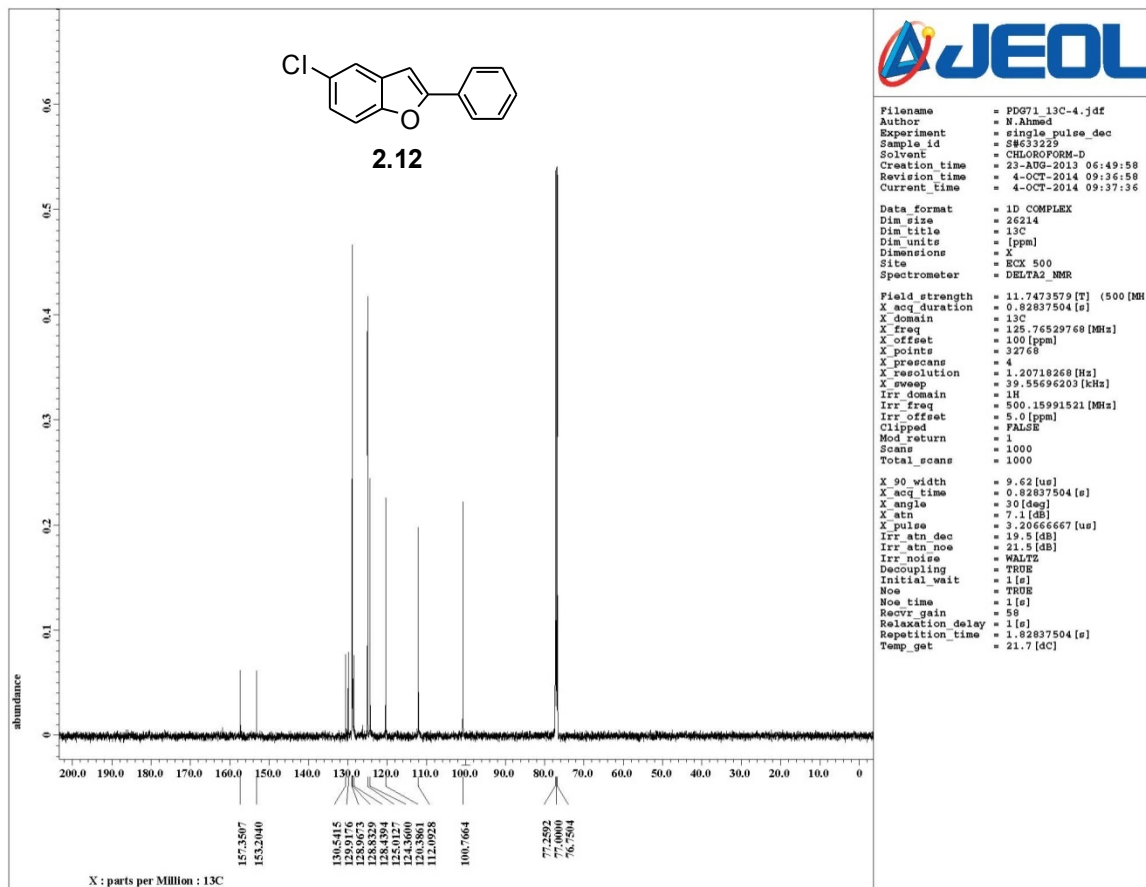

$^{13}\text{C}$  NMR (125 MHz,  $\text{CDCl}_3$ ) spectrum of **2.12**

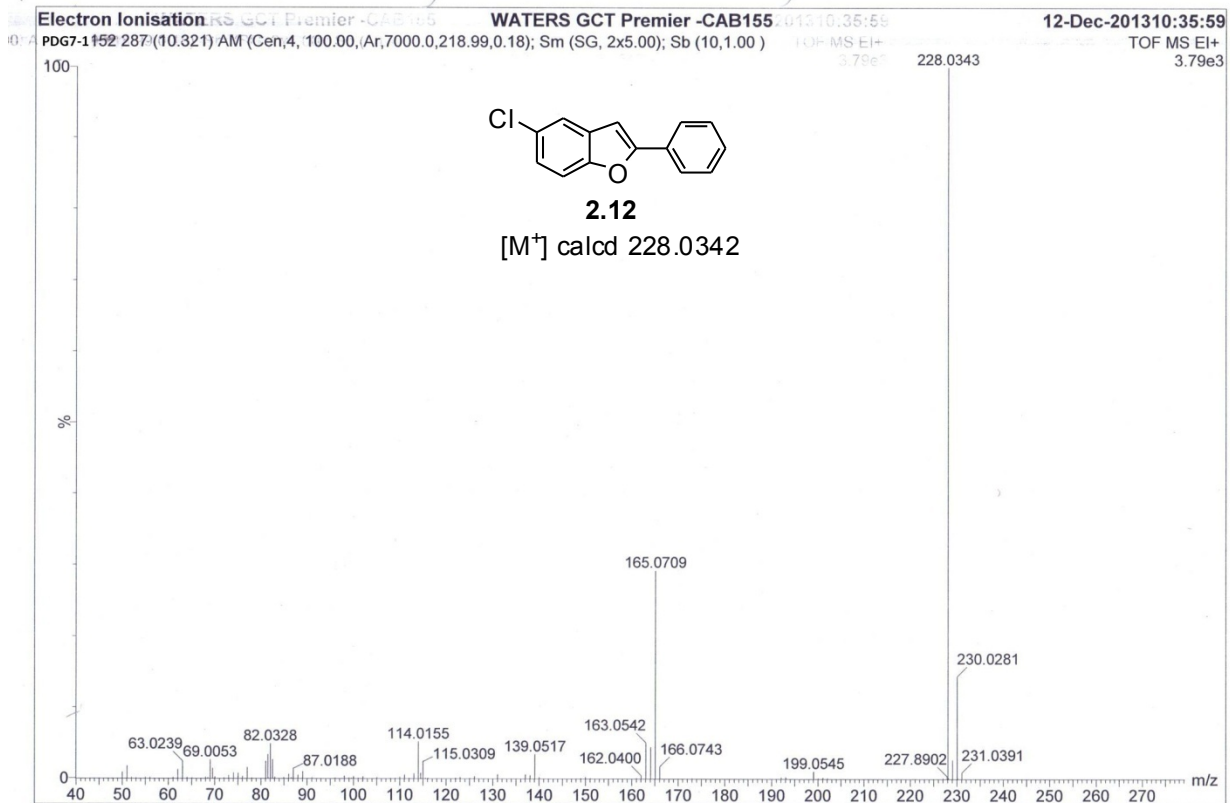

EI (HRMS) spectrum of **2.12**

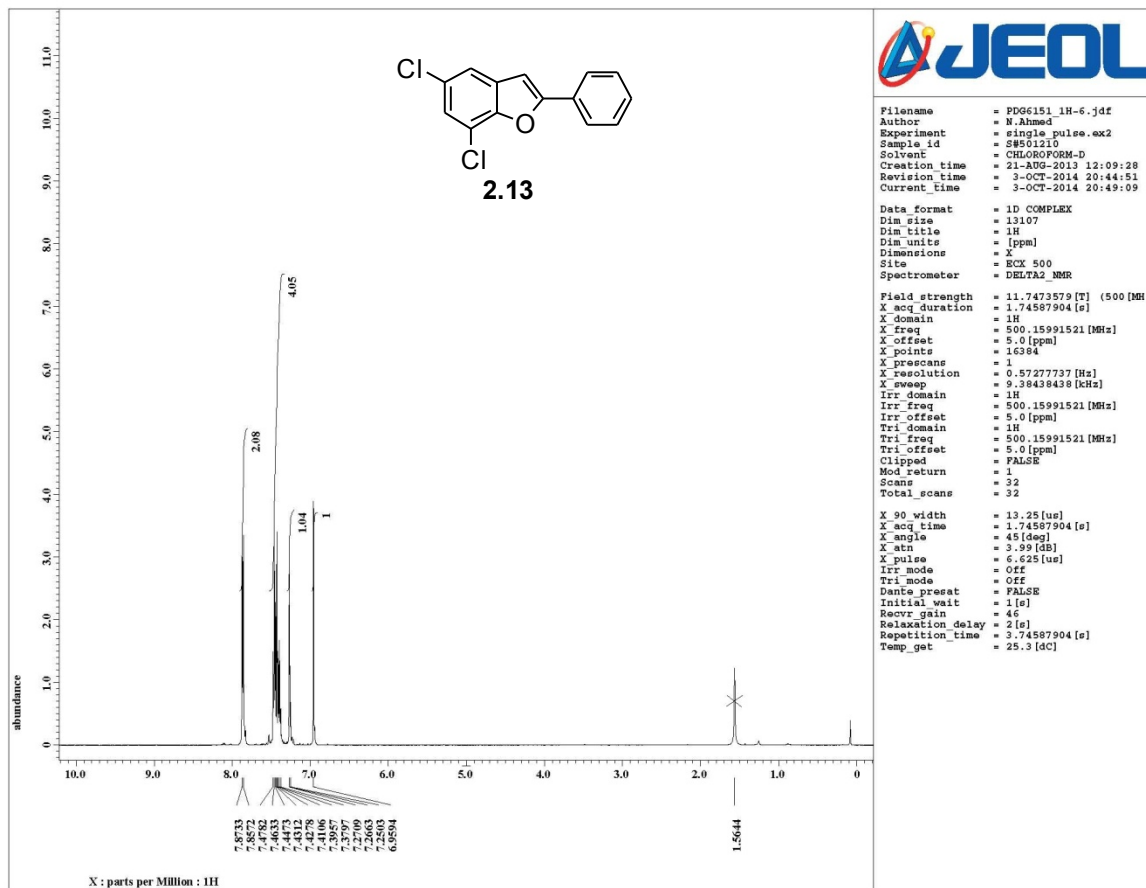

$^1\text{H}$  NMR (500 MHz,  $\text{CDCl}_3$ ) spectrum of **2.13**

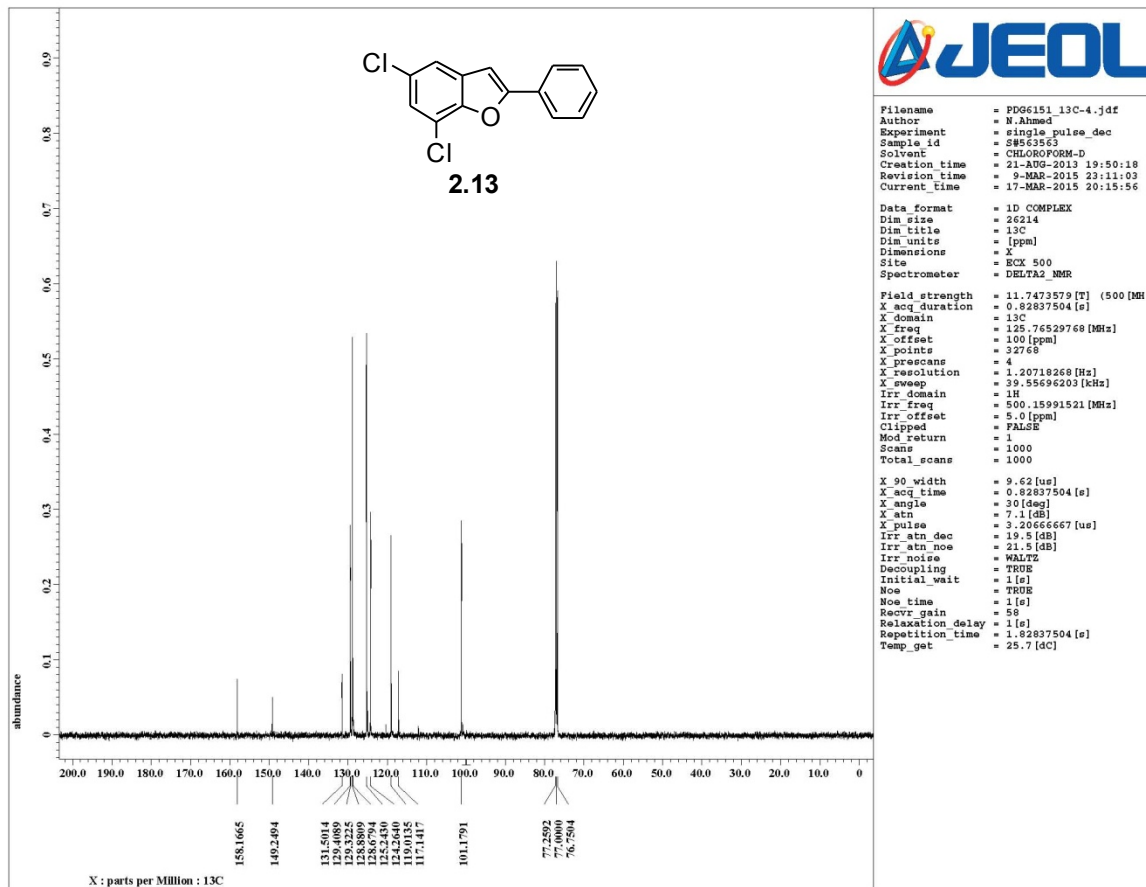

<sup>13</sup>C NMR (125 MHz, CDCl<sub>3</sub>) spectrum of **2.13**



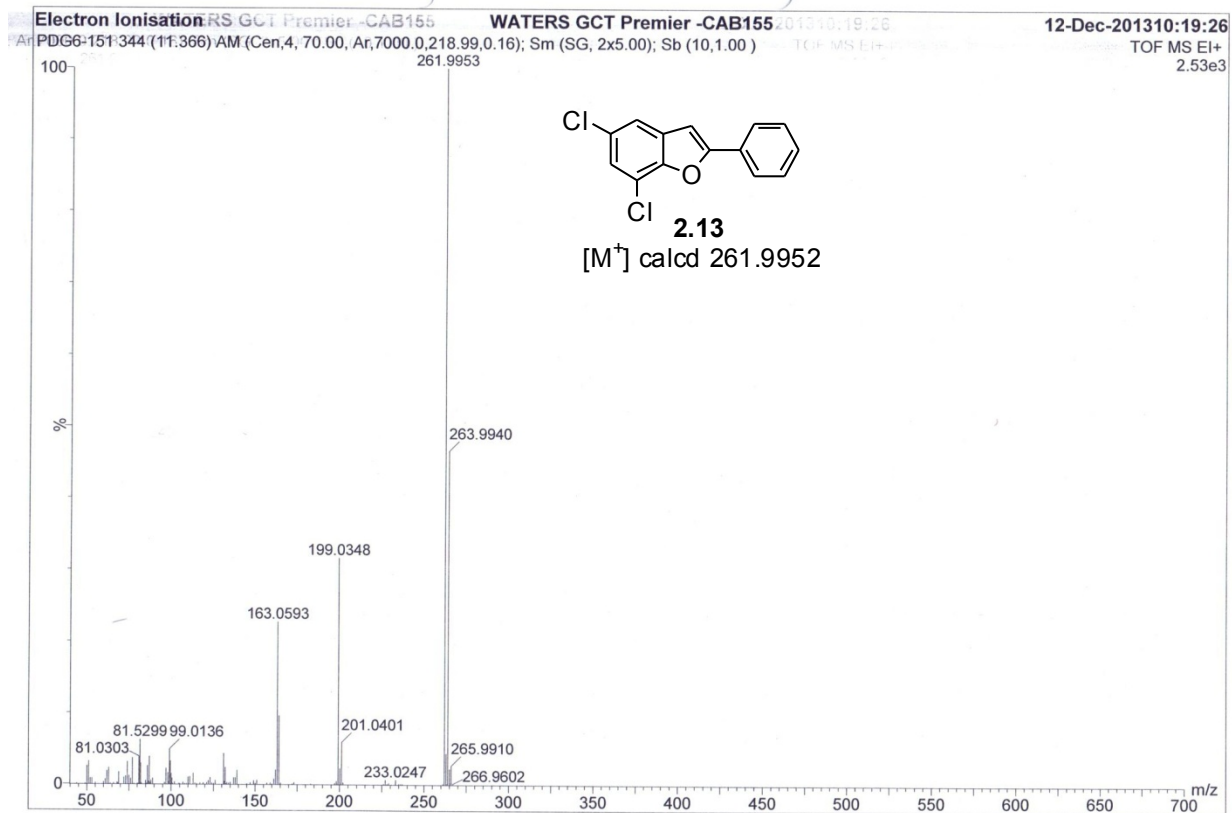

EI (HRMS) spectrum of **2.13**

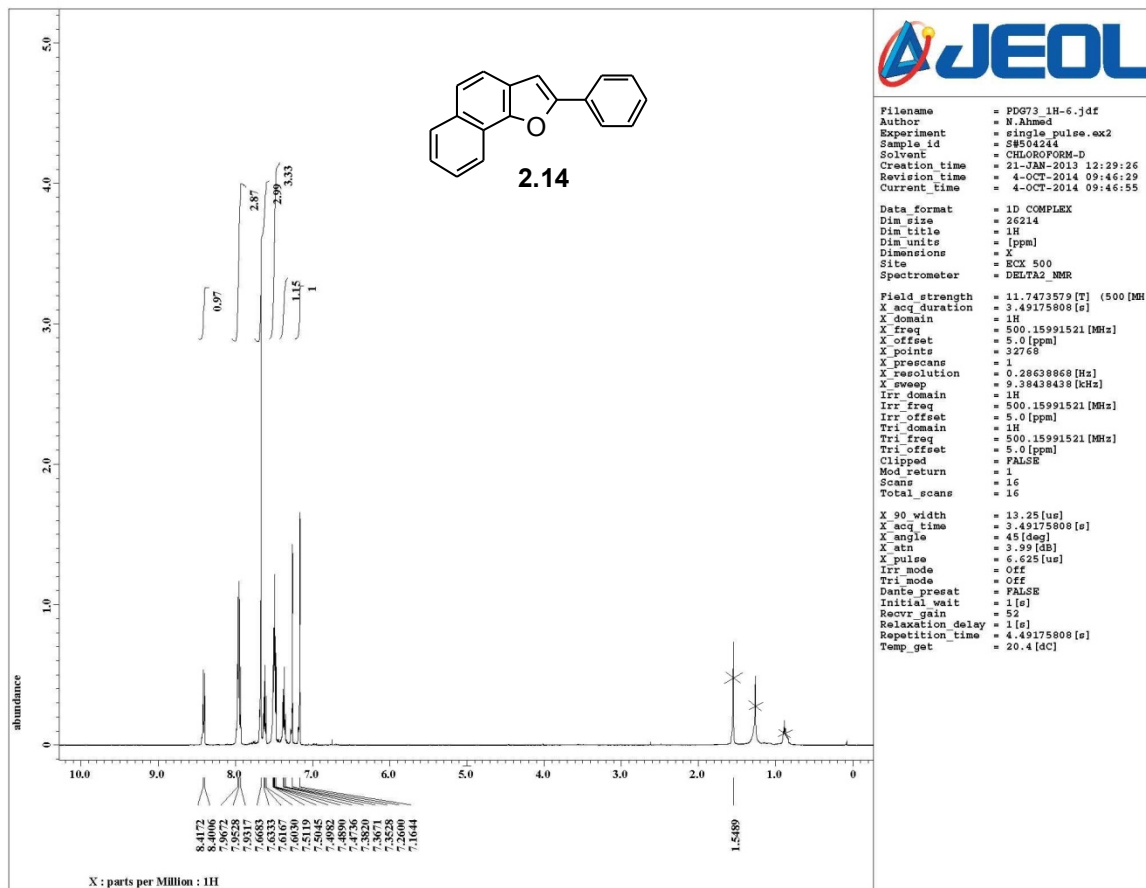

$^1\text{H}$  NMR (500 MHz,  $\text{CDCl}_3$ ) spectrum of **2.14**

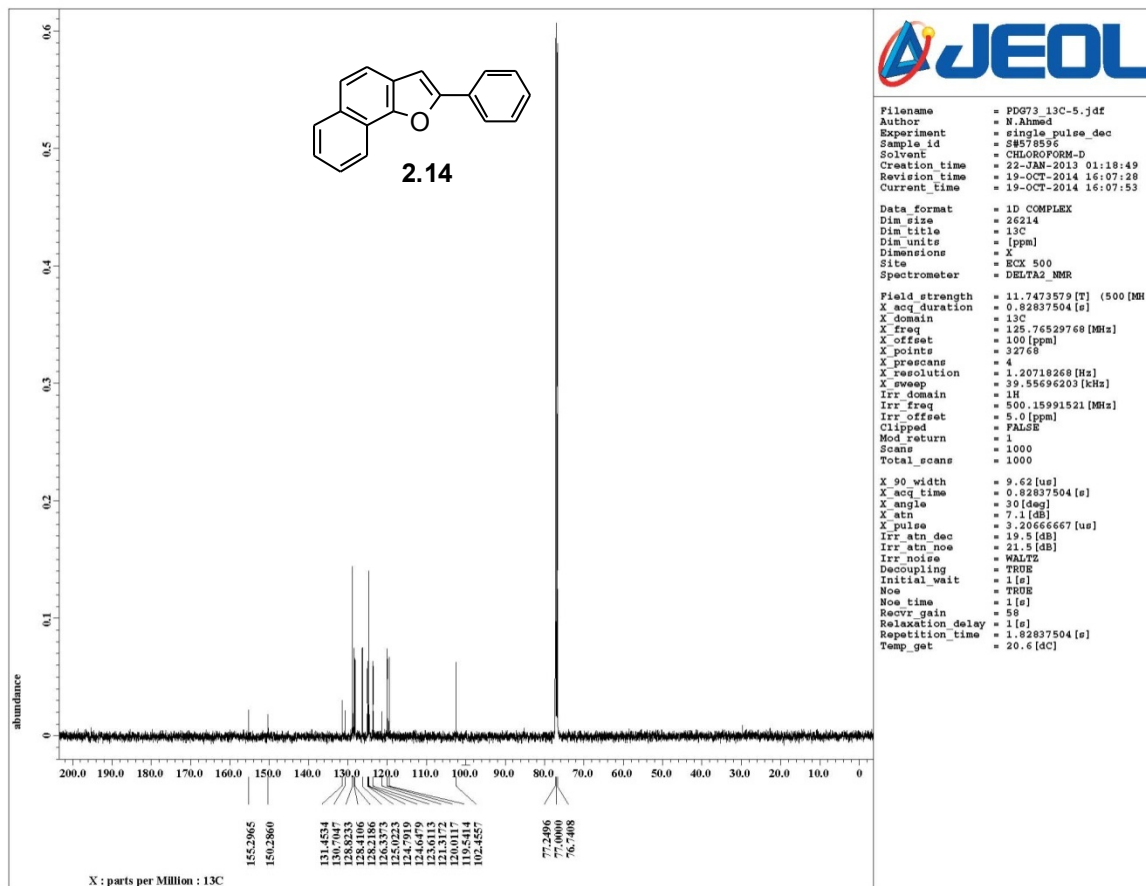

$^{13}\text{C}$  NMR (125 MHz,  $\text{CDCl}_3$ ) spectrum of **2.14**

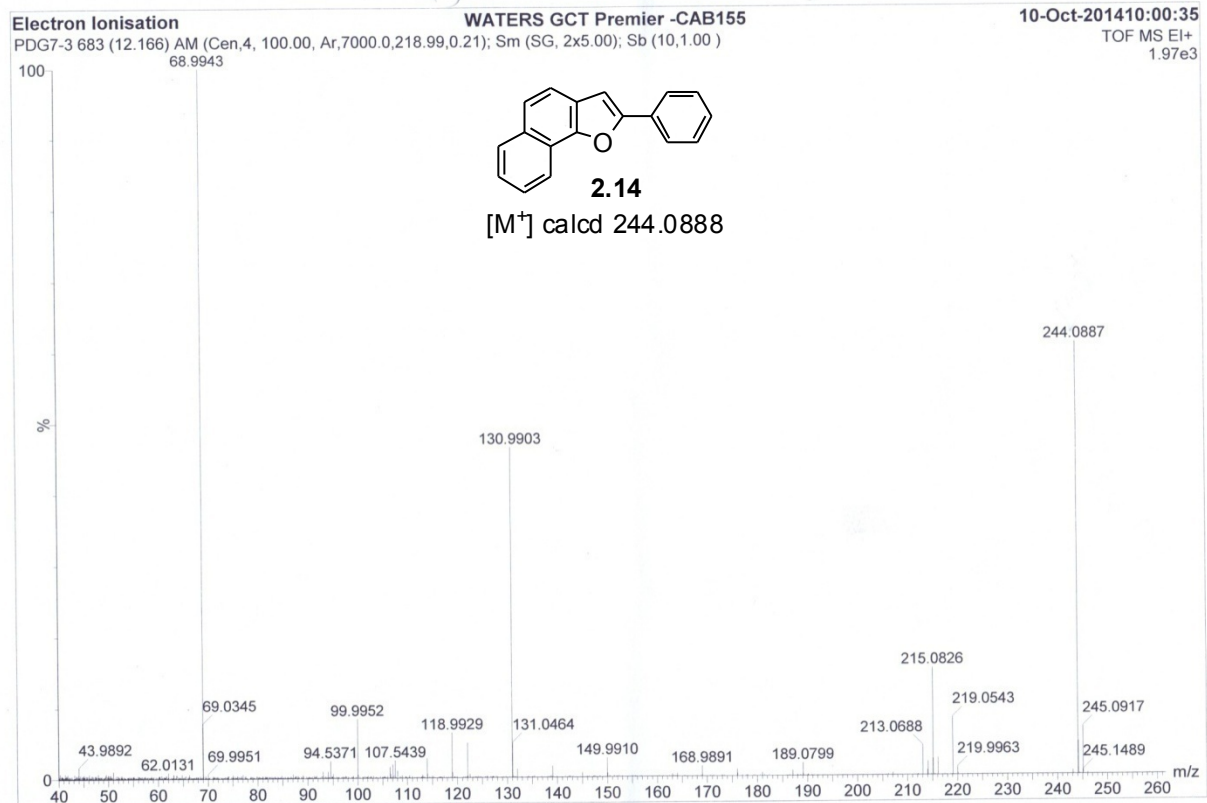

EI (HRMS) spectrum of **2.14**

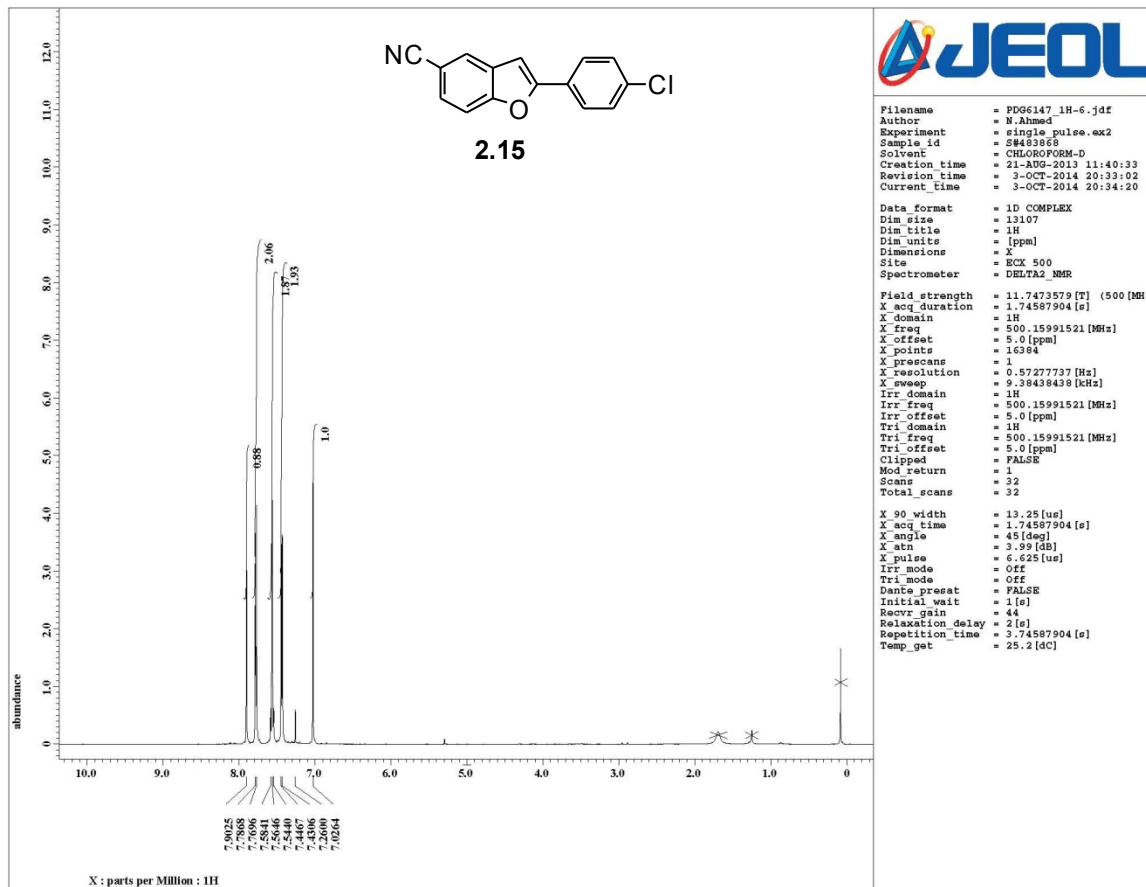

$^1\text{H}$  NMR (500 MHz,  $\text{CDCl}_3$ ) spectrum of **2.15**

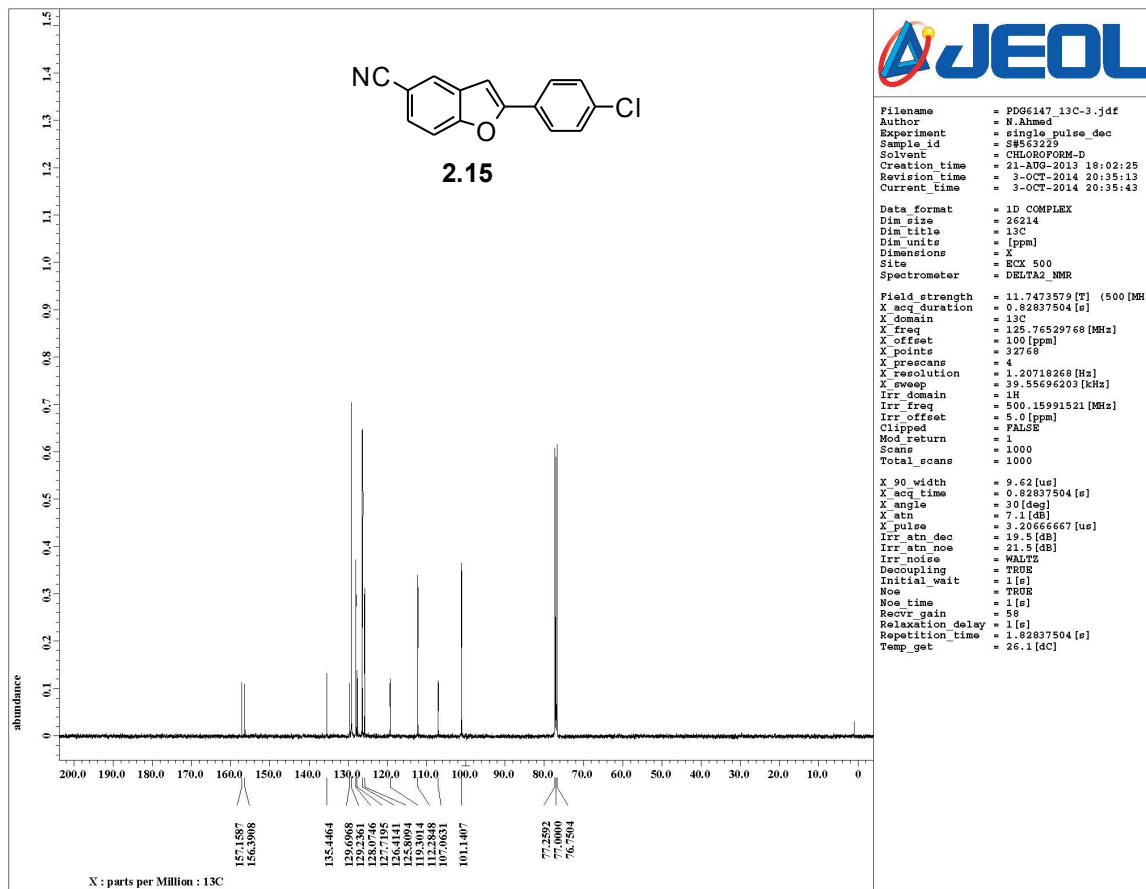

$^{13}\text{C}$  NMR (125 MHz,  $\text{CDCl}_3$ ) spectrum of **2.15**

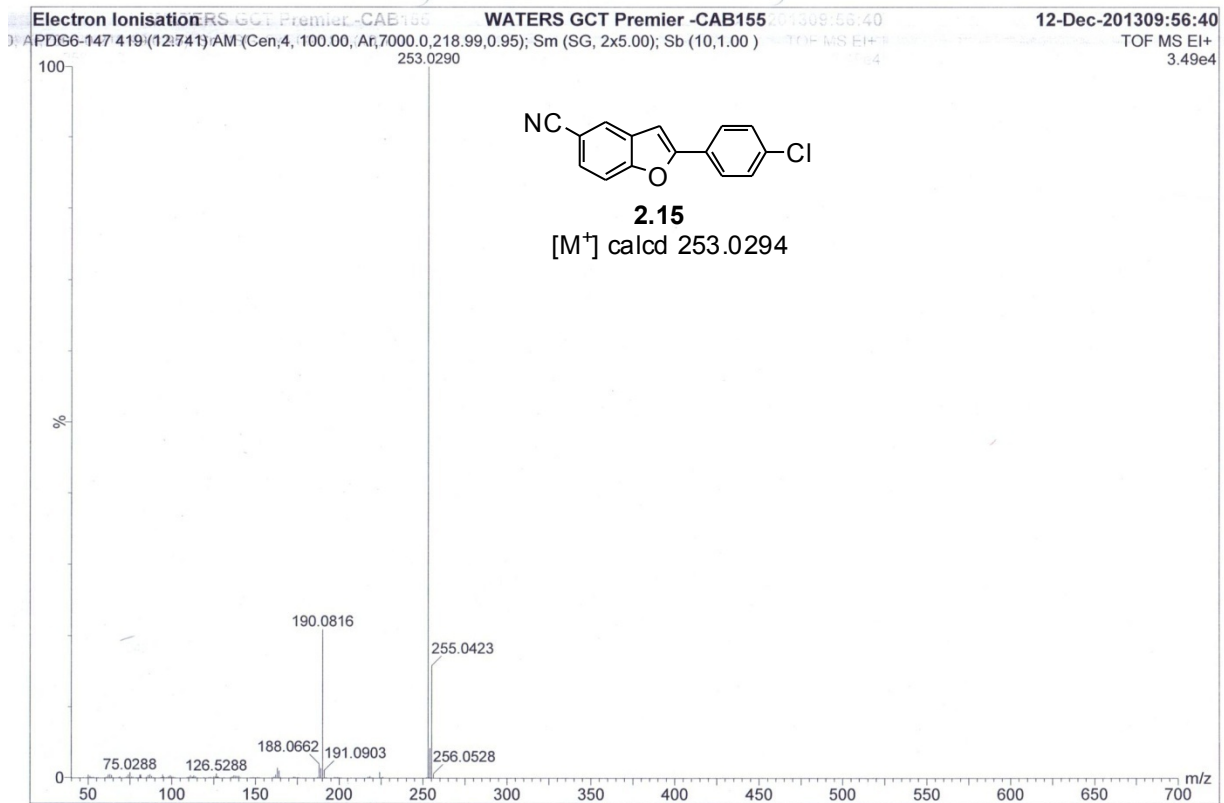

EI (HRMS) spectrum of **2.15**

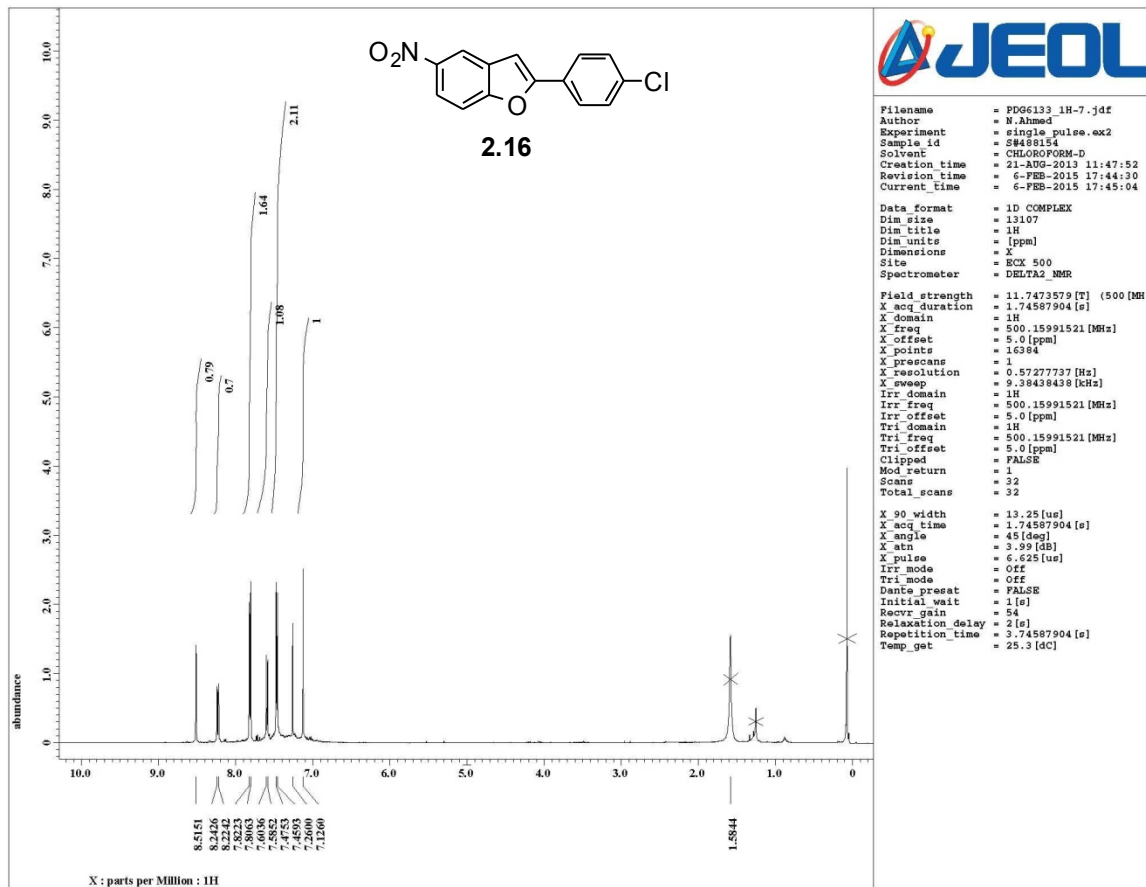

$^1\text{H}$  NMR (500 MHz,  $\text{CDCl}_3$ ) spectrum of **2.16**



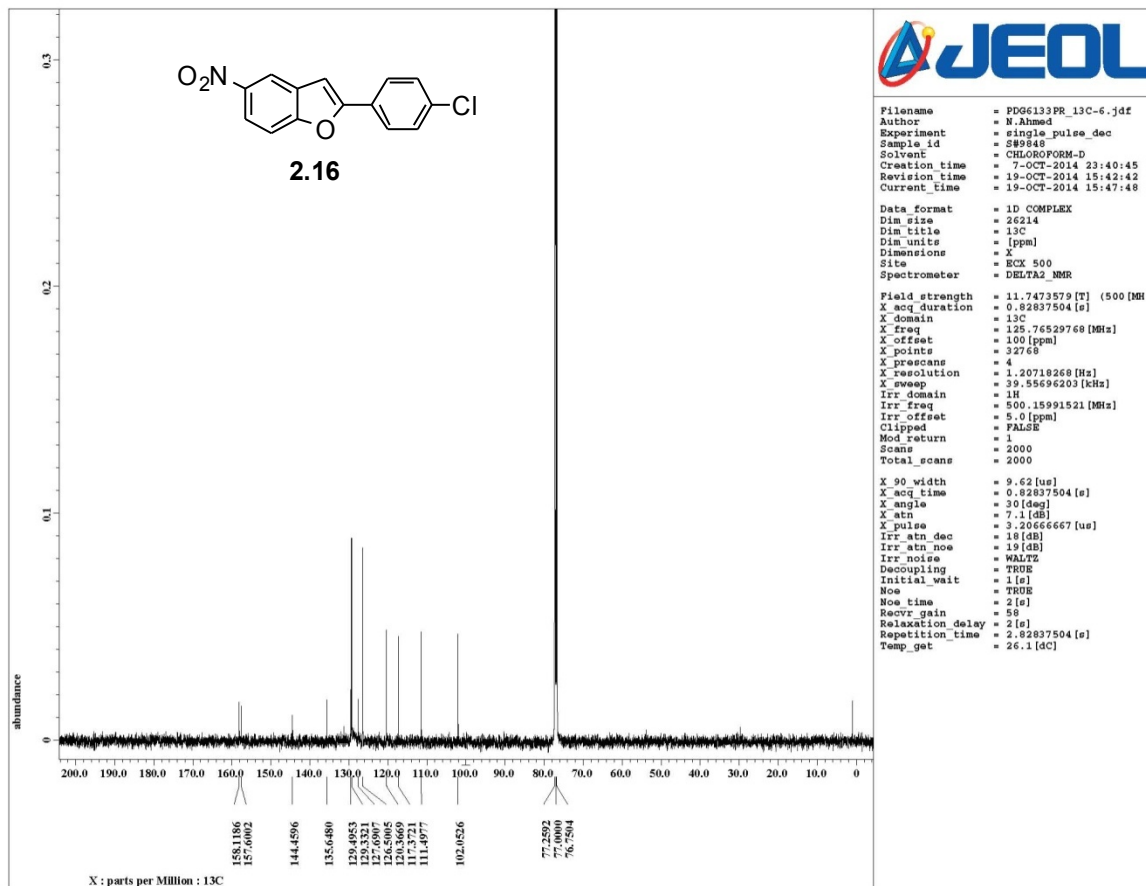

$^{13}\text{C}$  NMR (125 MHz,  $\text{CDCl}_3$ ) spectrum of **2.16**

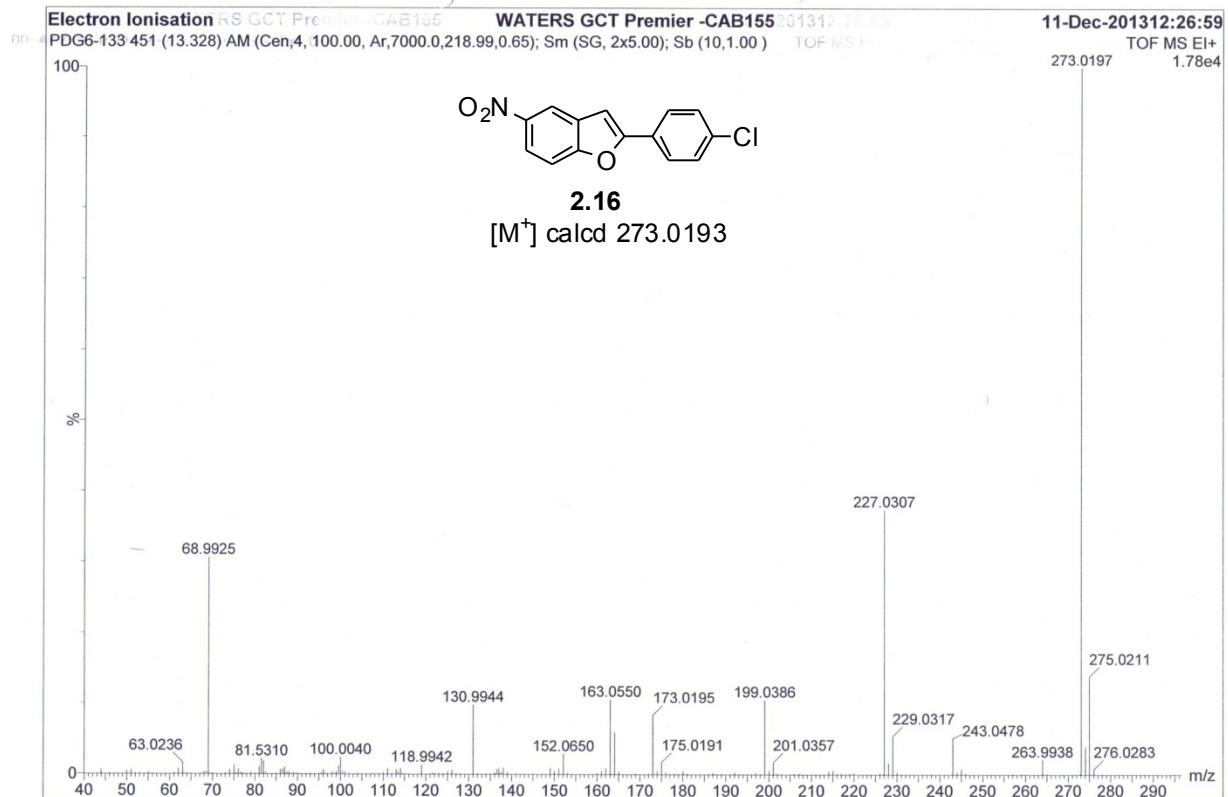

EI (HRMS) spectrum of **2.16**

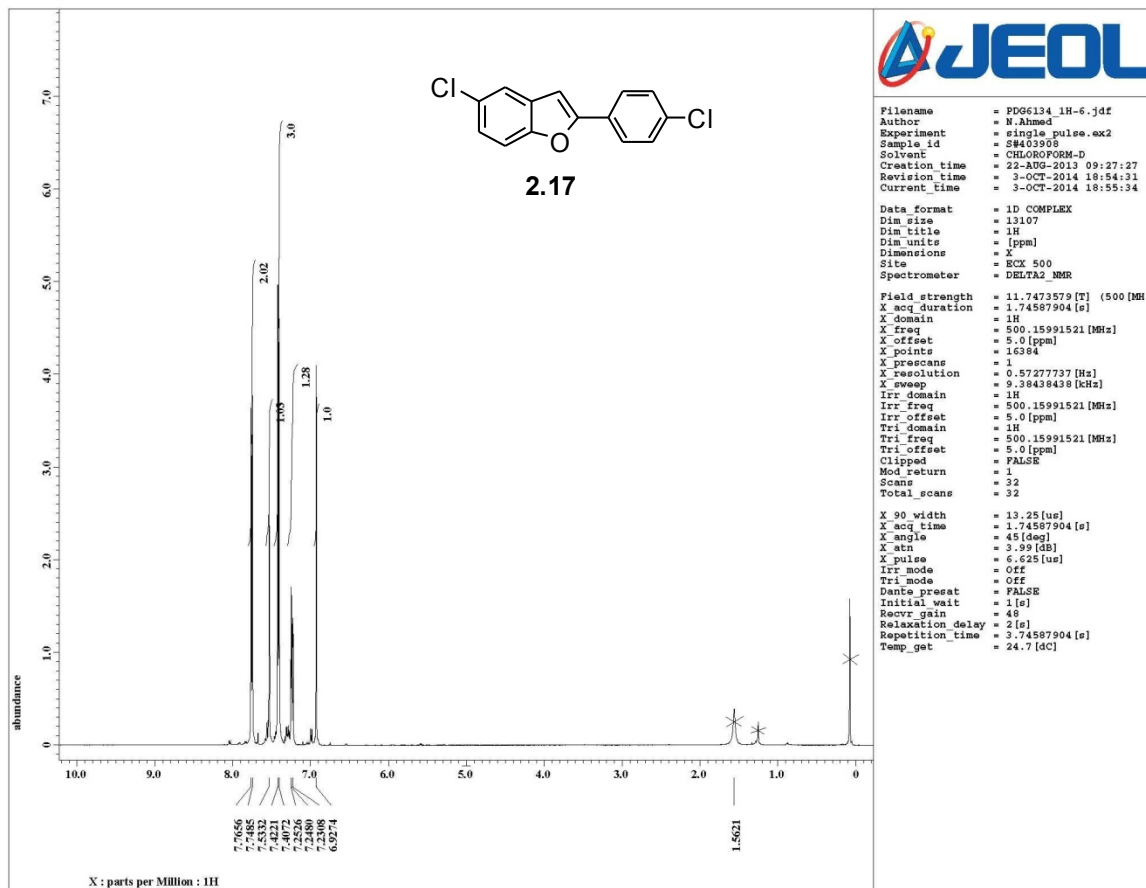

$^1\text{H}$  NMR (500 MHz,  $\text{CDCl}_3$ ) spectrum of **2.17**

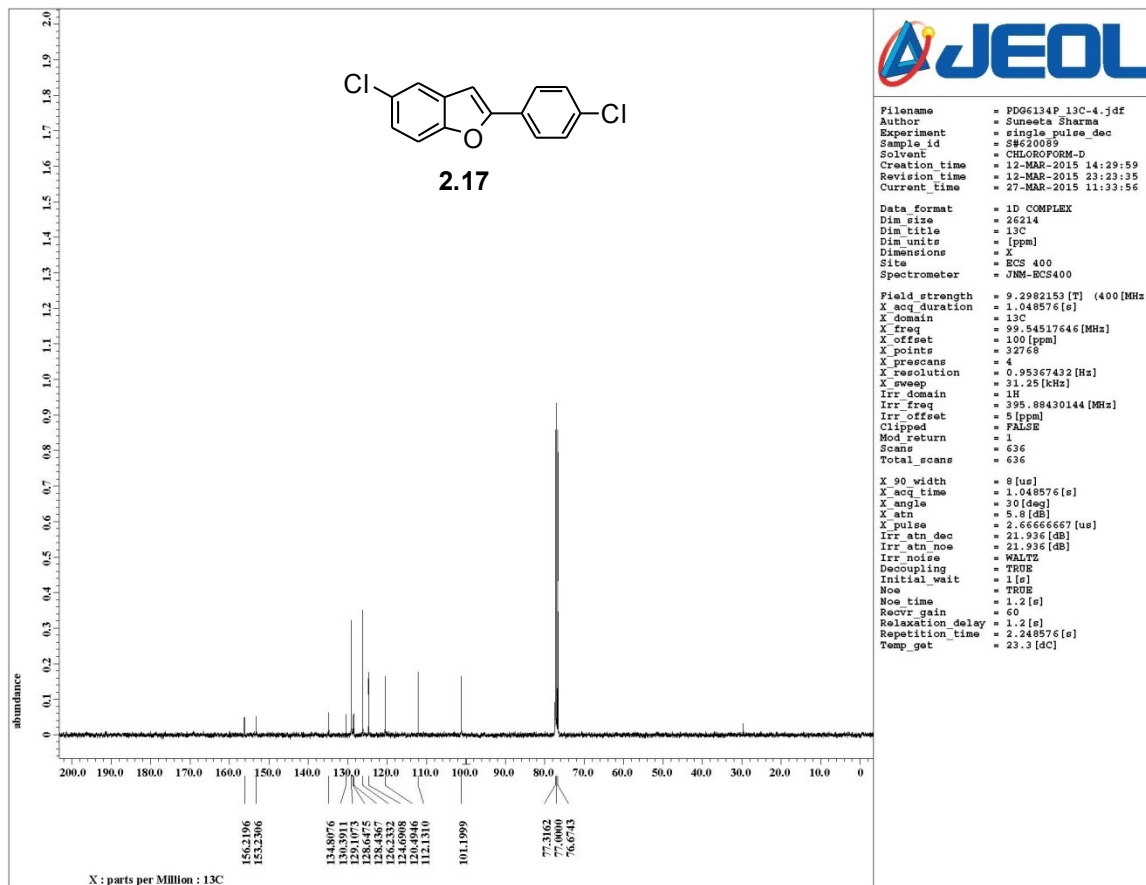

$^{13}\text{C}$  NMR (100 MHz,  $\text{CDCl}_3$ ) spectrum of **2.17**

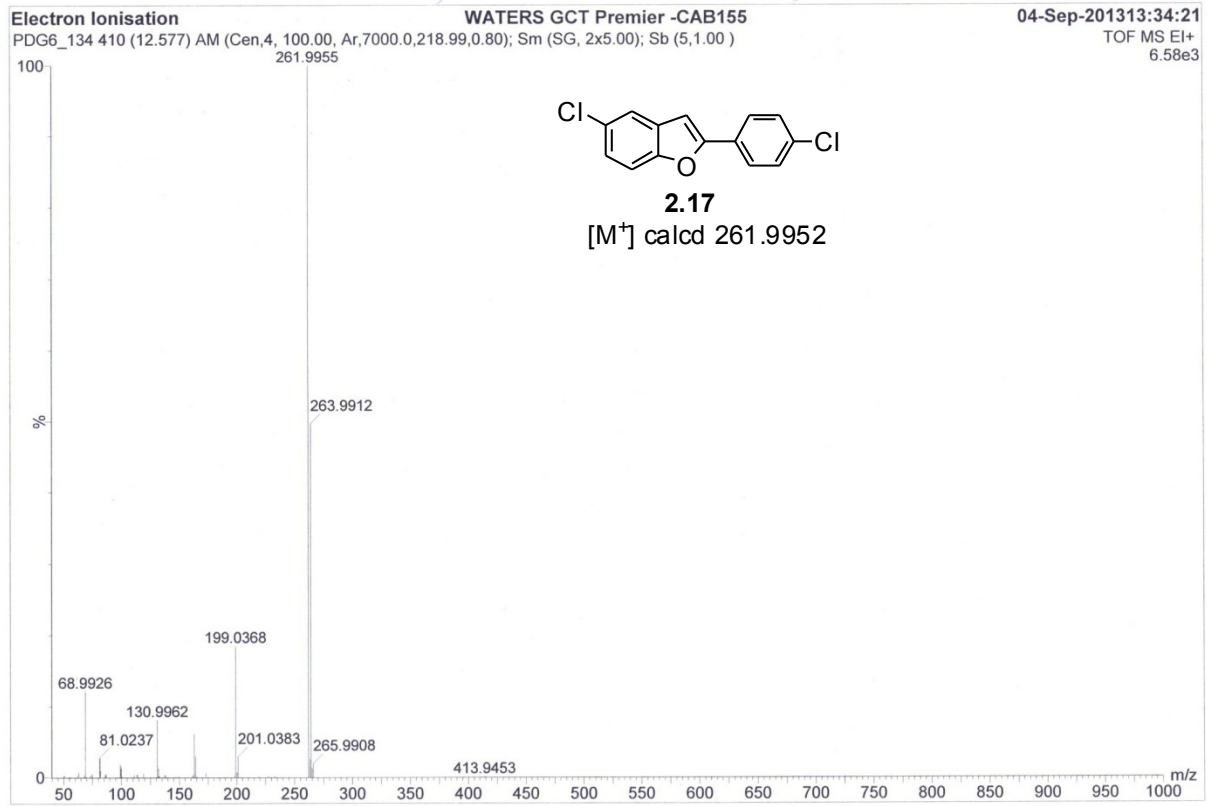

EI (HRMS) spectrum of **2.17**

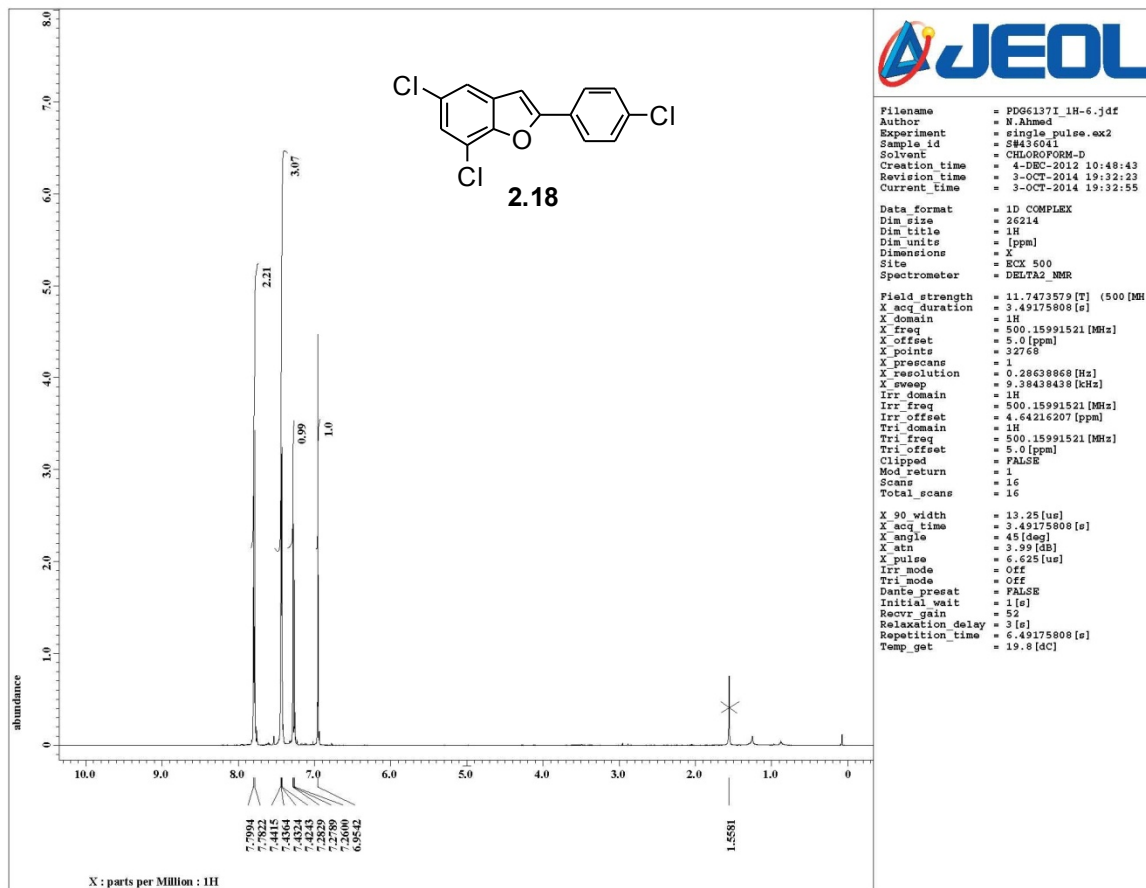

$^1\text{H}$  NMR (500 MHz,  $\text{CDCl}_3$ ) spectrum of **2.18**

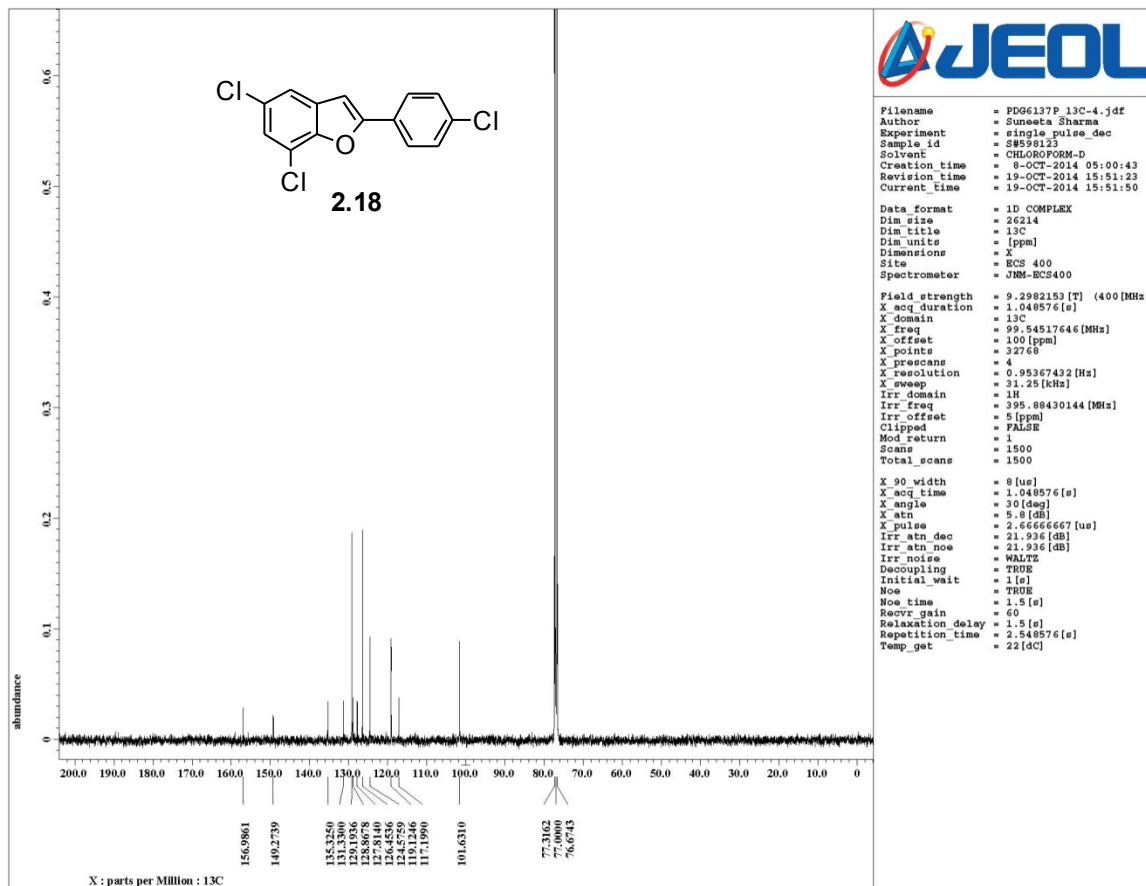

$^{13}\text{C}$  NMR (100 MHz,  $\text{CDCl}_3$ ) spectrum of **2.18**

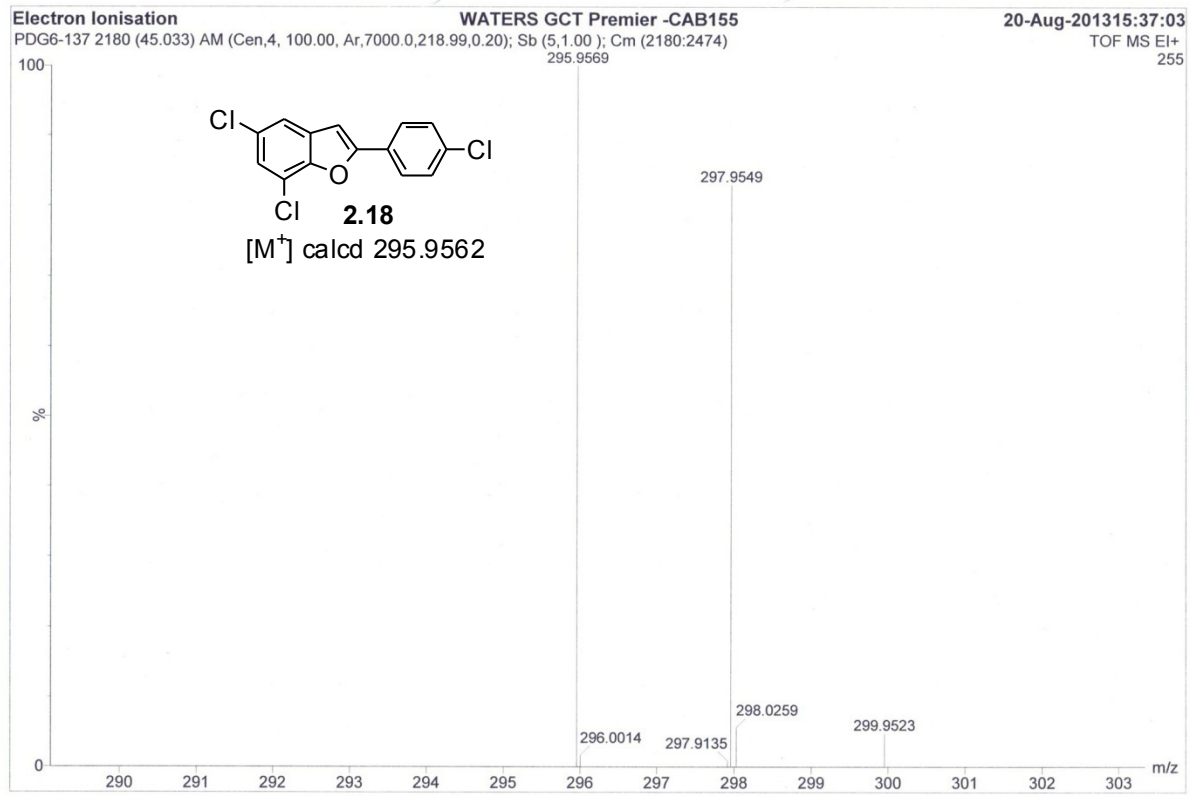

EI (HRMS) spectrum of **2.18**



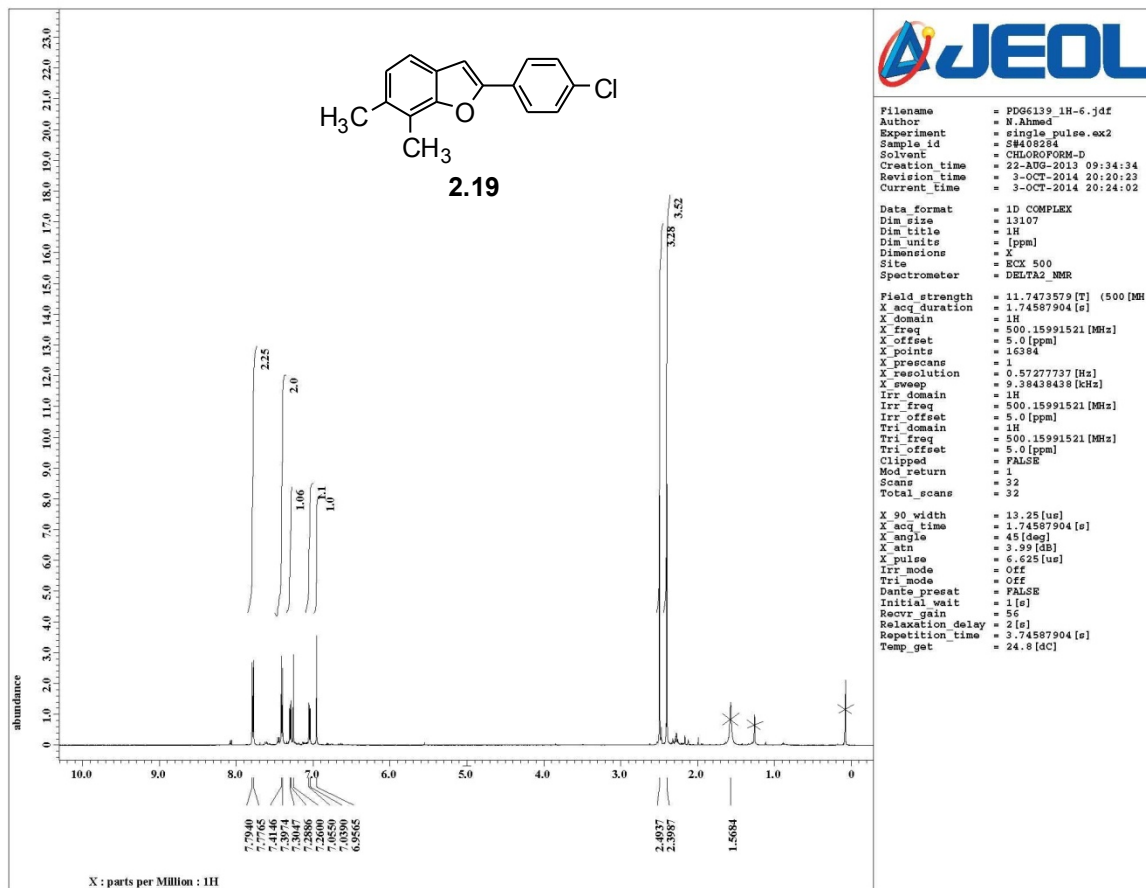

<sup>1</sup>H NMR (500 MHz, CDCl<sub>3</sub>) spectrum of **2.19**

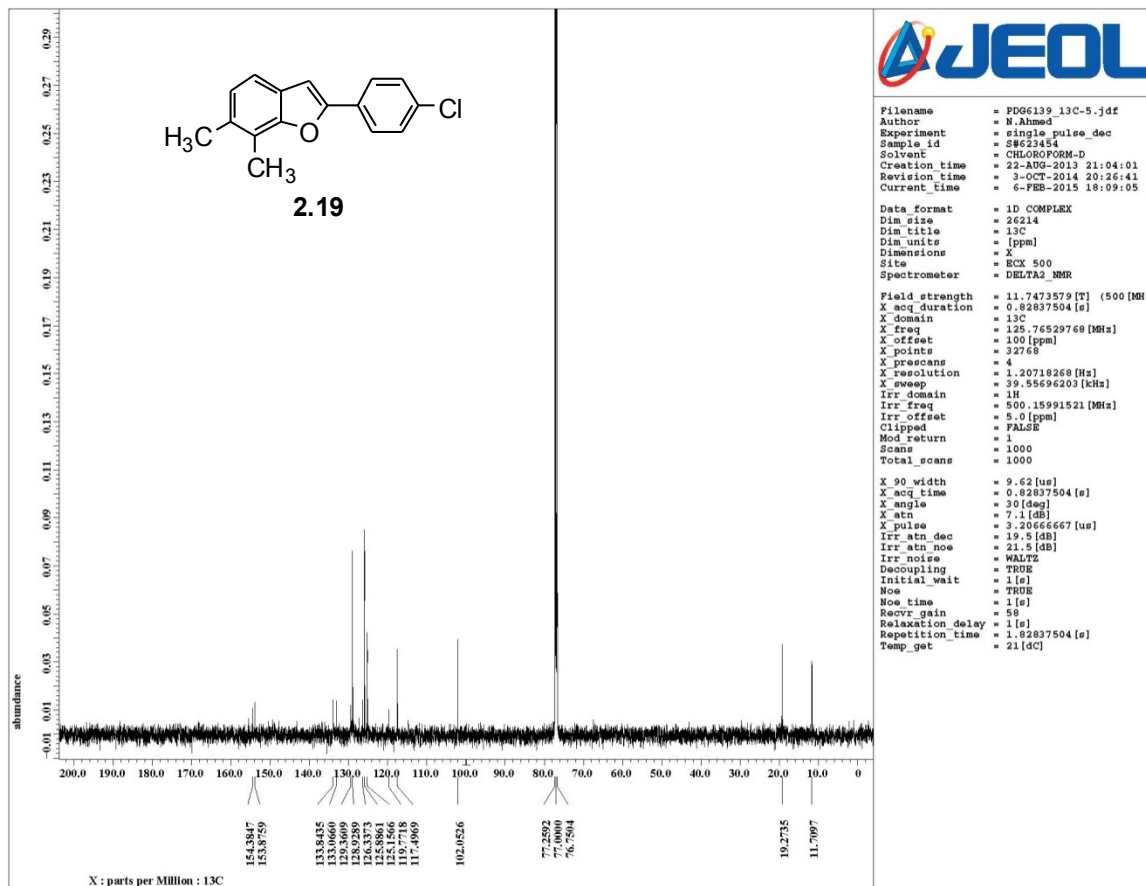

$^{13}\text{C}$  NMR (125 MHz,  $\text{CDCl}_3$ ) spectrum of **2.19**

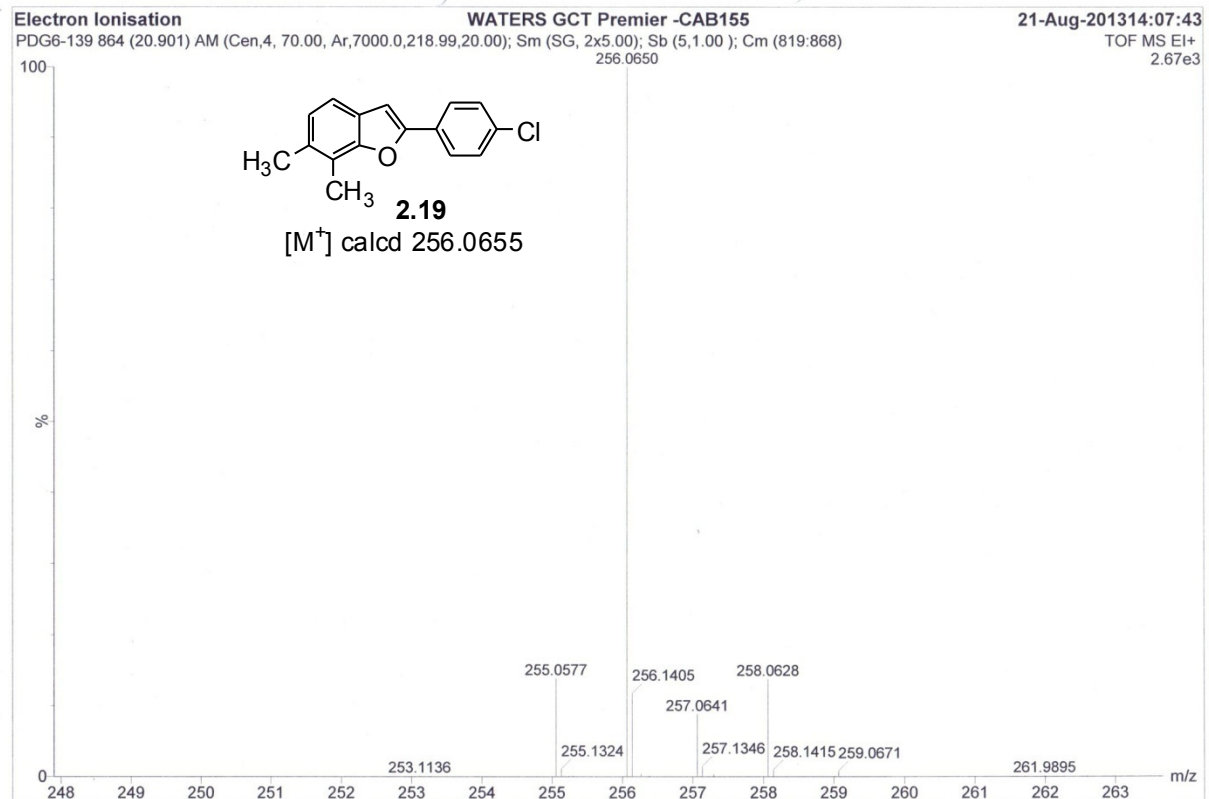

EI (HRMS) spectrum of **2.19**

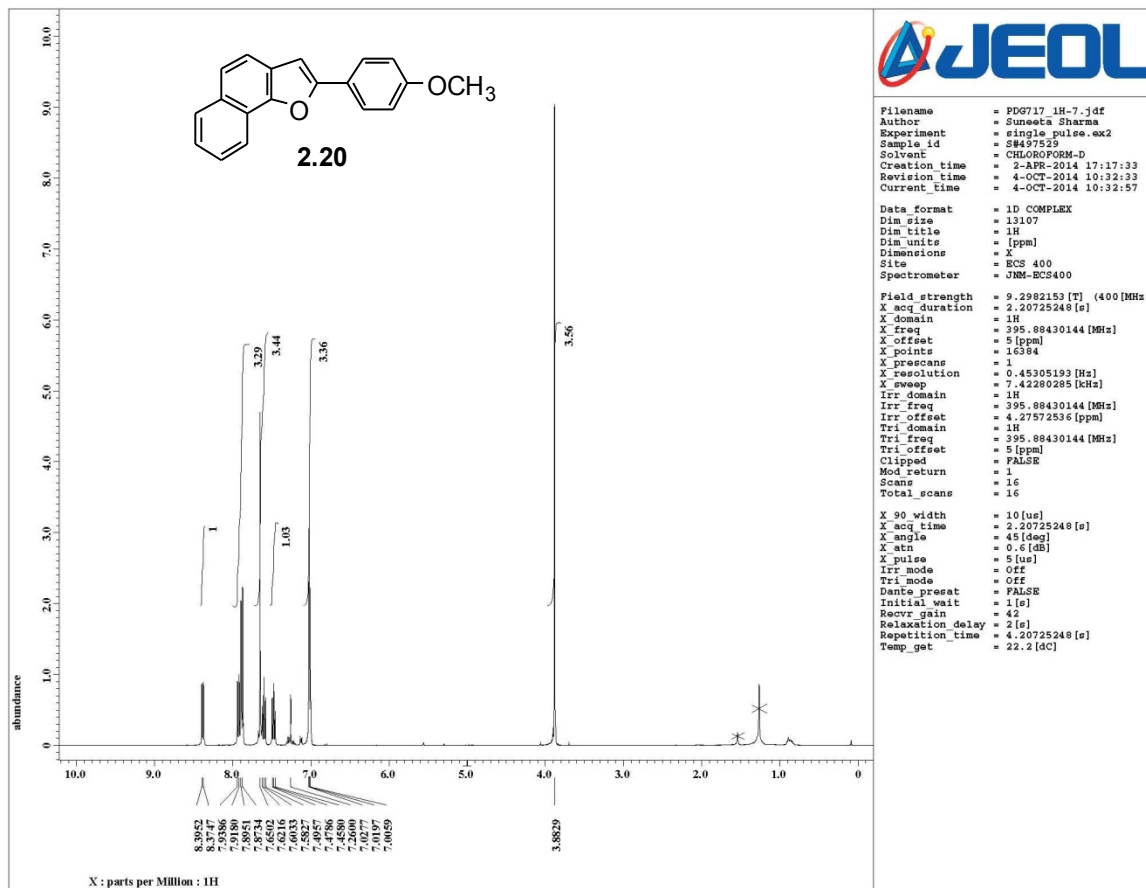

<sup>1</sup>H NMR (400 MHz, CDCl<sub>3</sub>) spectrum of **2.20**

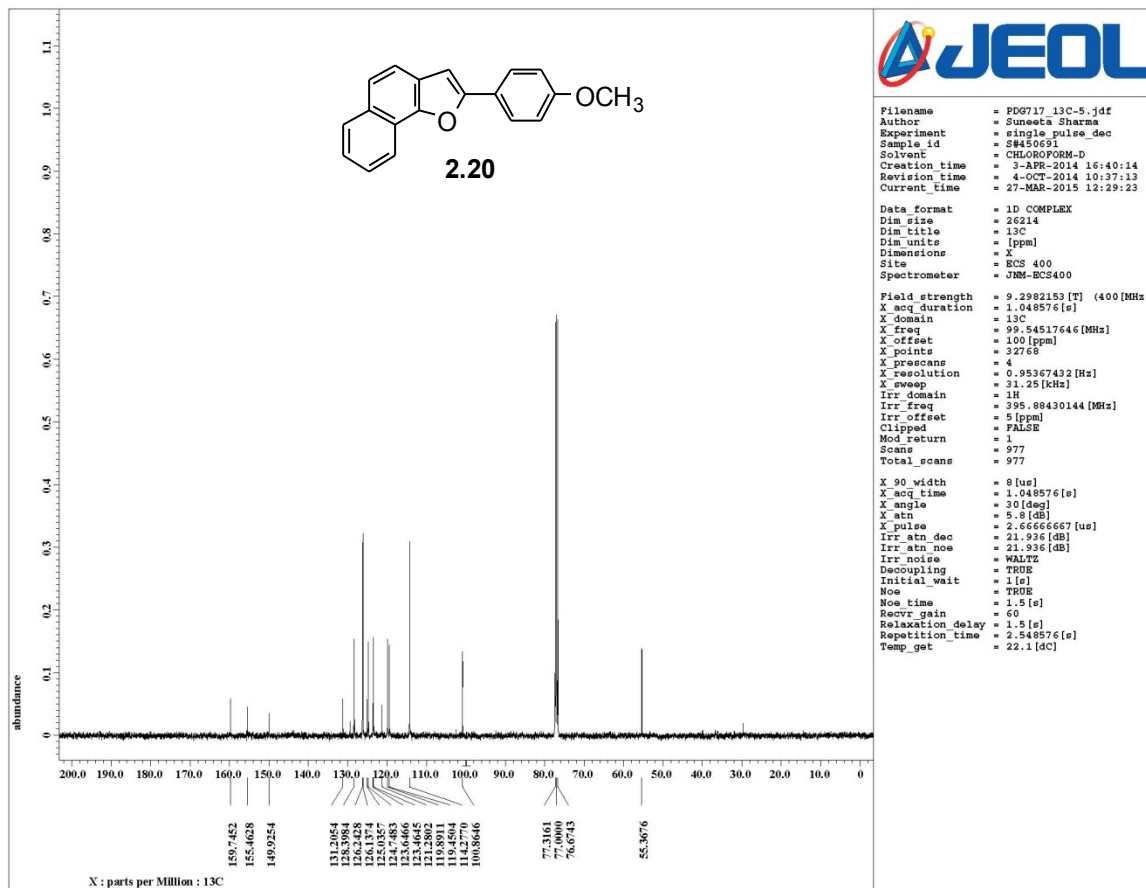

$^{13}\text{C}$  NMR (100 MHz,  $\text{CDCl}_3$ ) spectrum of **2.20**

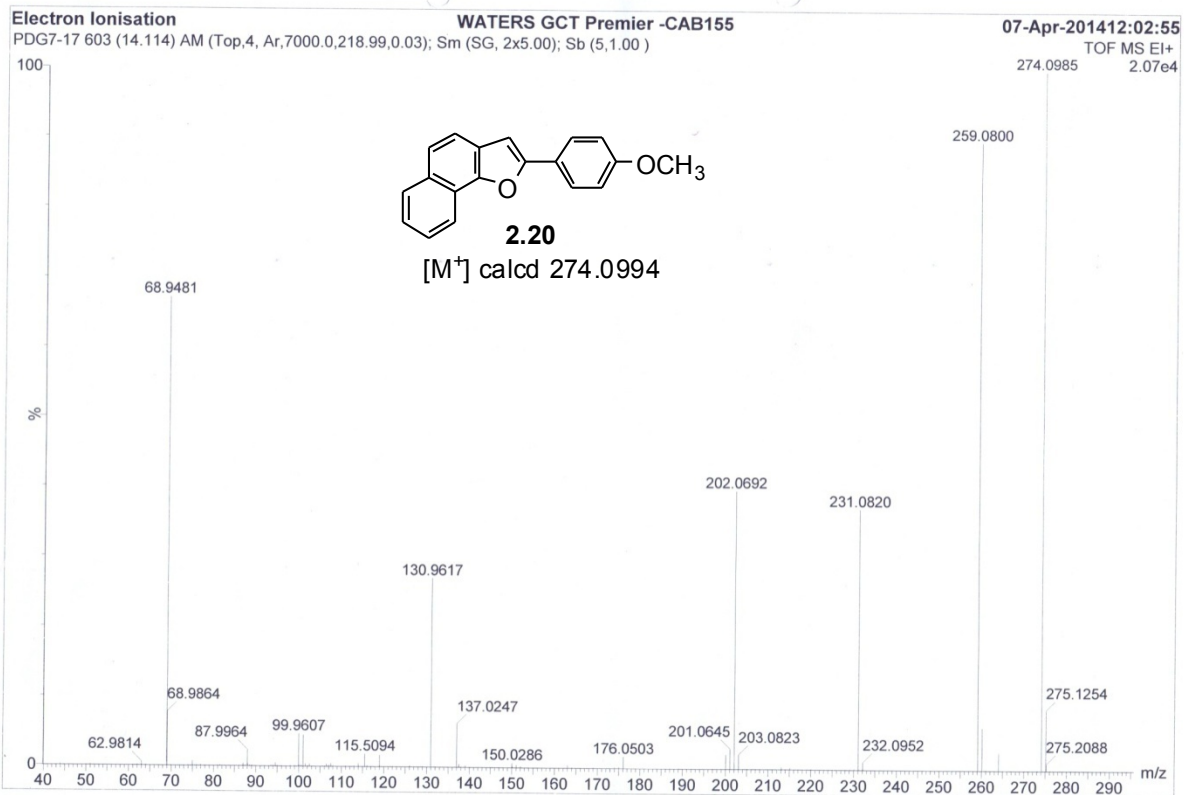

EI (HRMS) spectrum of **2.20**

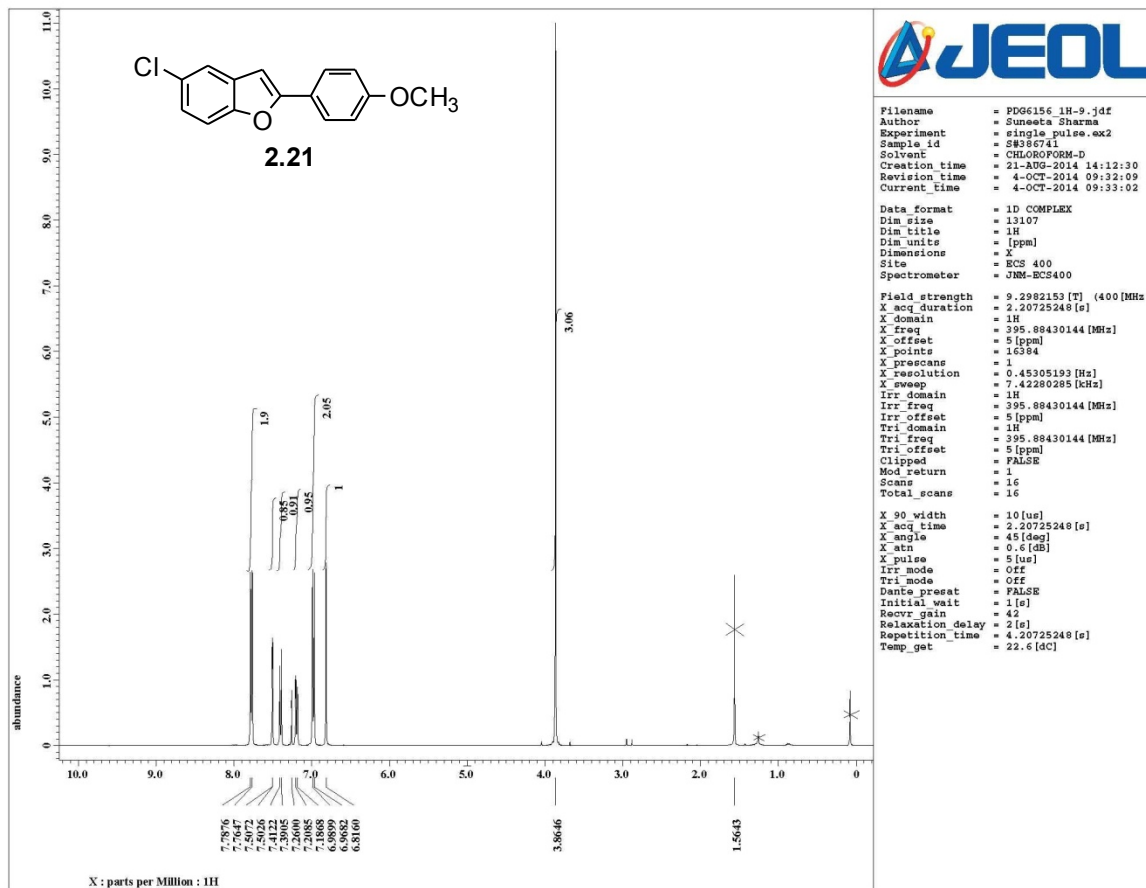

$^1\text{H}$  NMR (400 MHz,  $\text{CDCl}_3$ ) spectrum of **2.21**

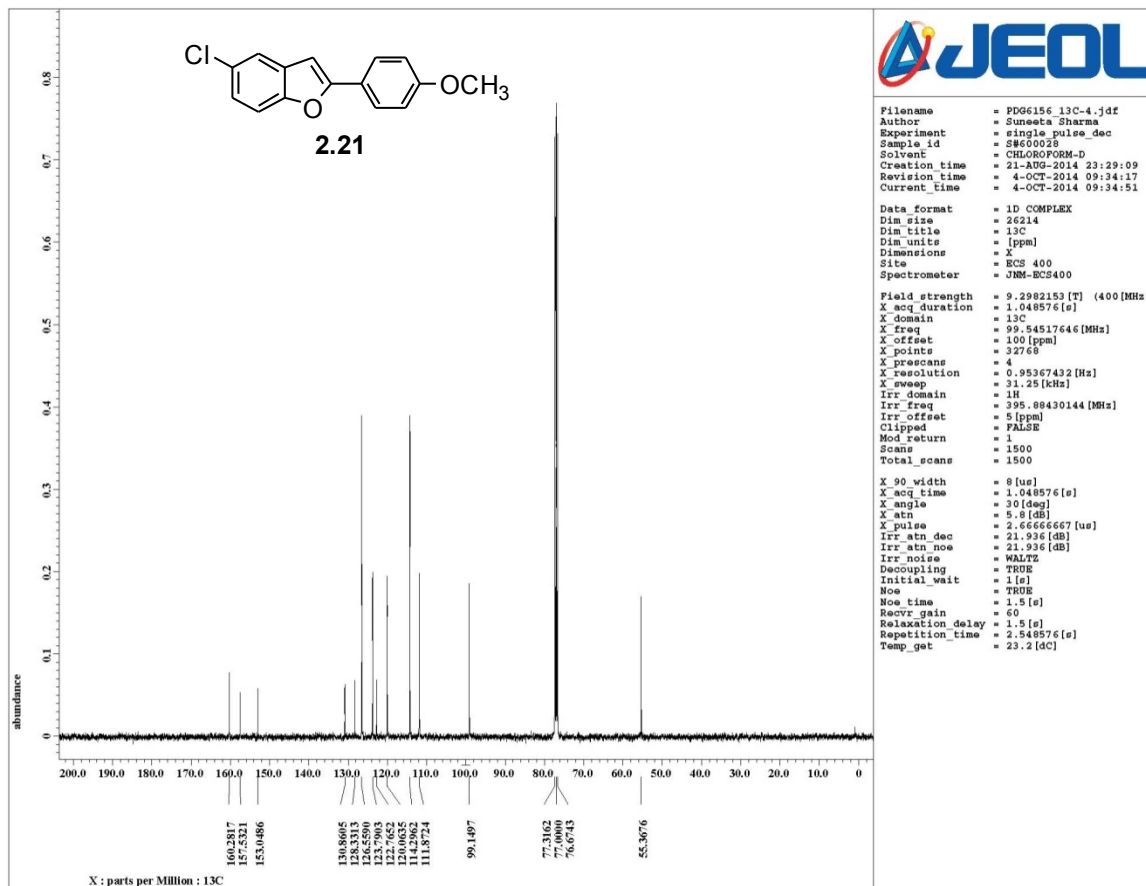

<sup>13</sup>C NMR (100 MHz, CDCl<sub>3</sub>) spectrum of **2.21**



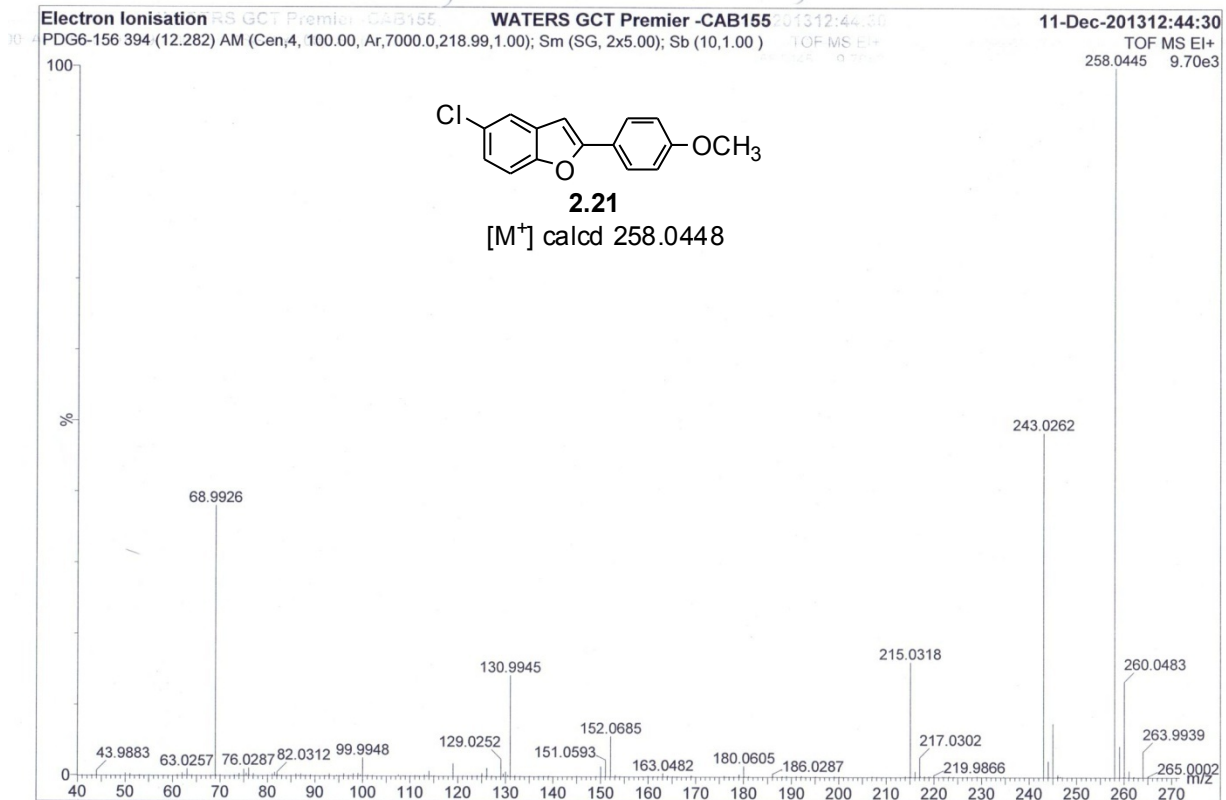

EI (HRMS) spectrum of **2.21**

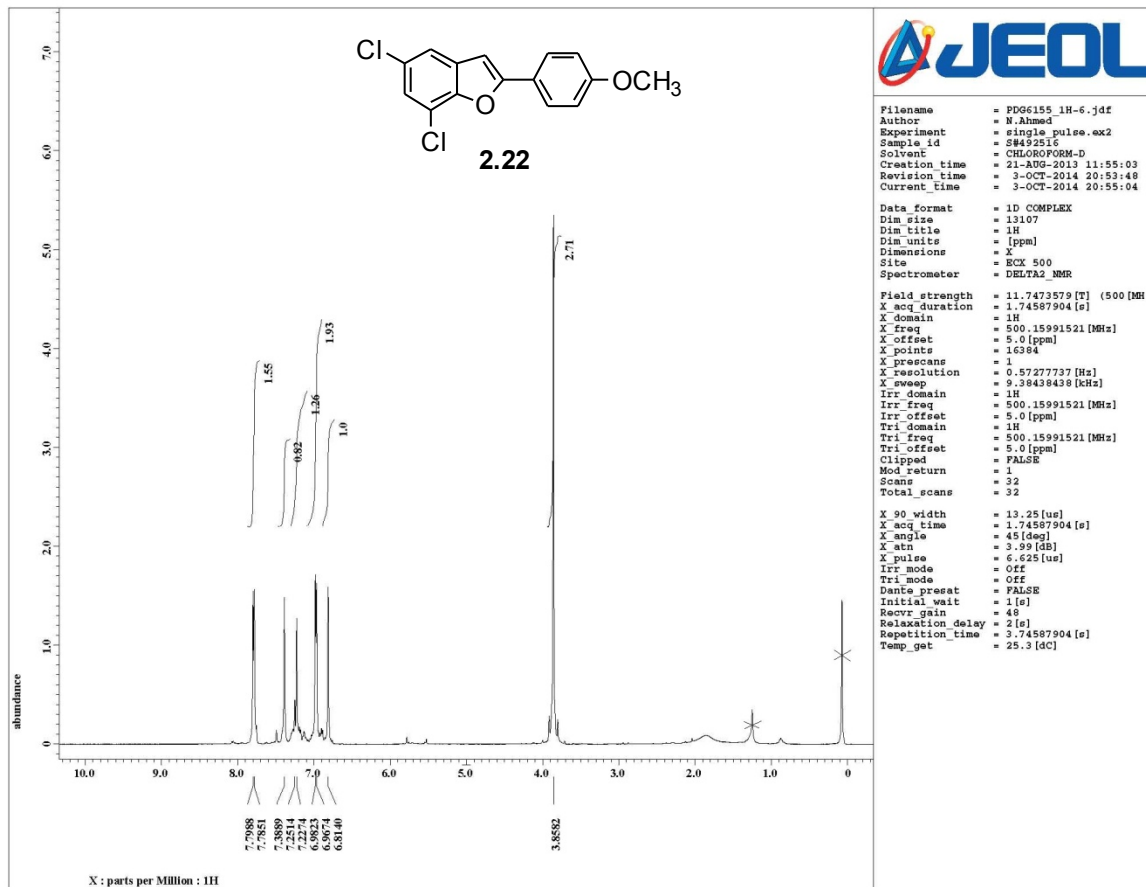

$^1\text{H}$  NMR (500 MHz,  $\text{CDCl}_3$ ) spectrum of **2.22**

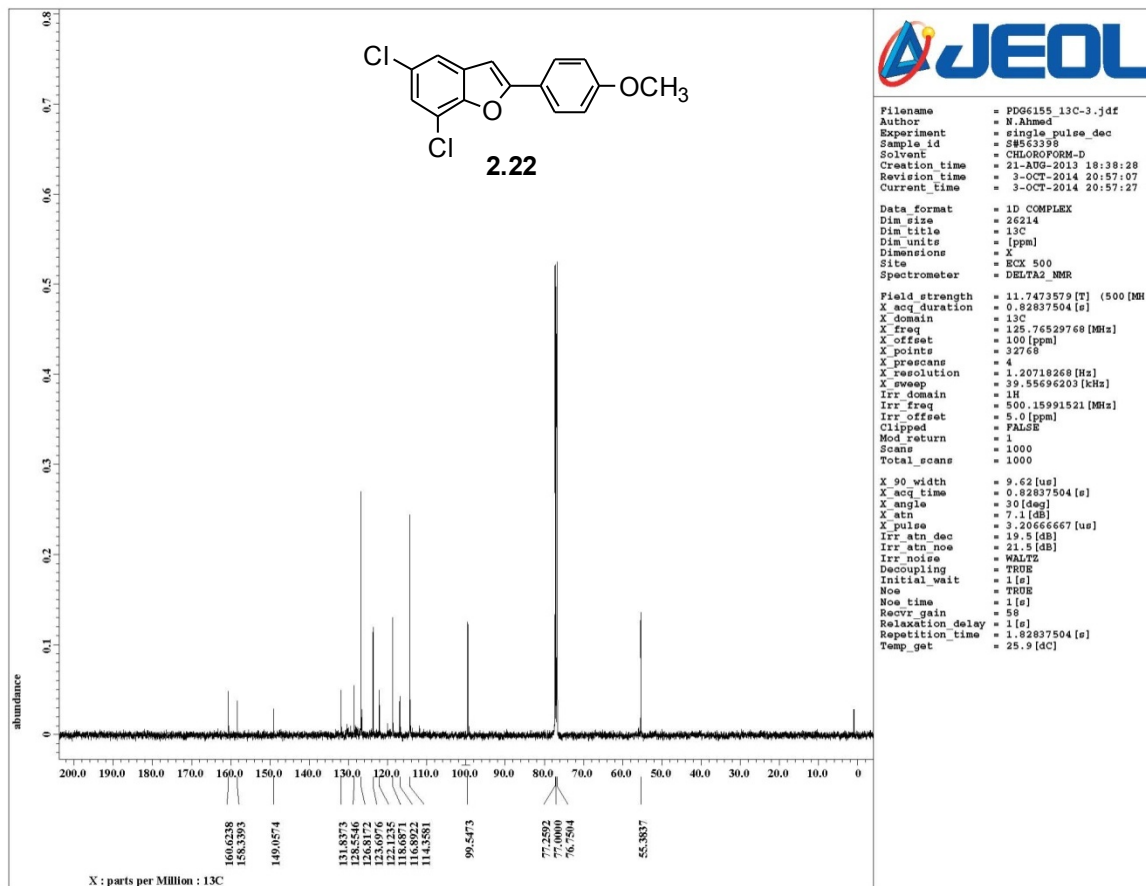

$^{13}\text{C}$  NMR (125 MHz,  $\text{CDCl}_3$ ) spectrum of **2.22**

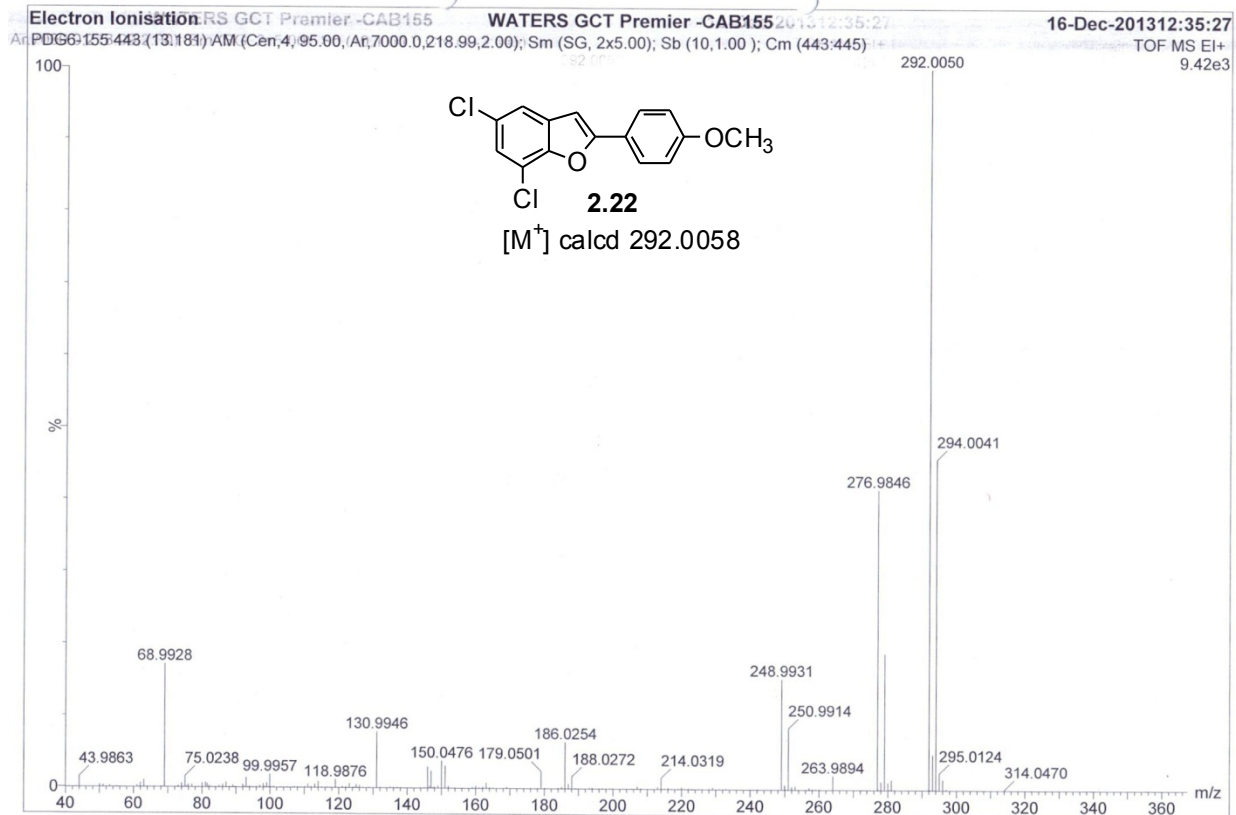

EI (HRMS) spectrum of **2.22**

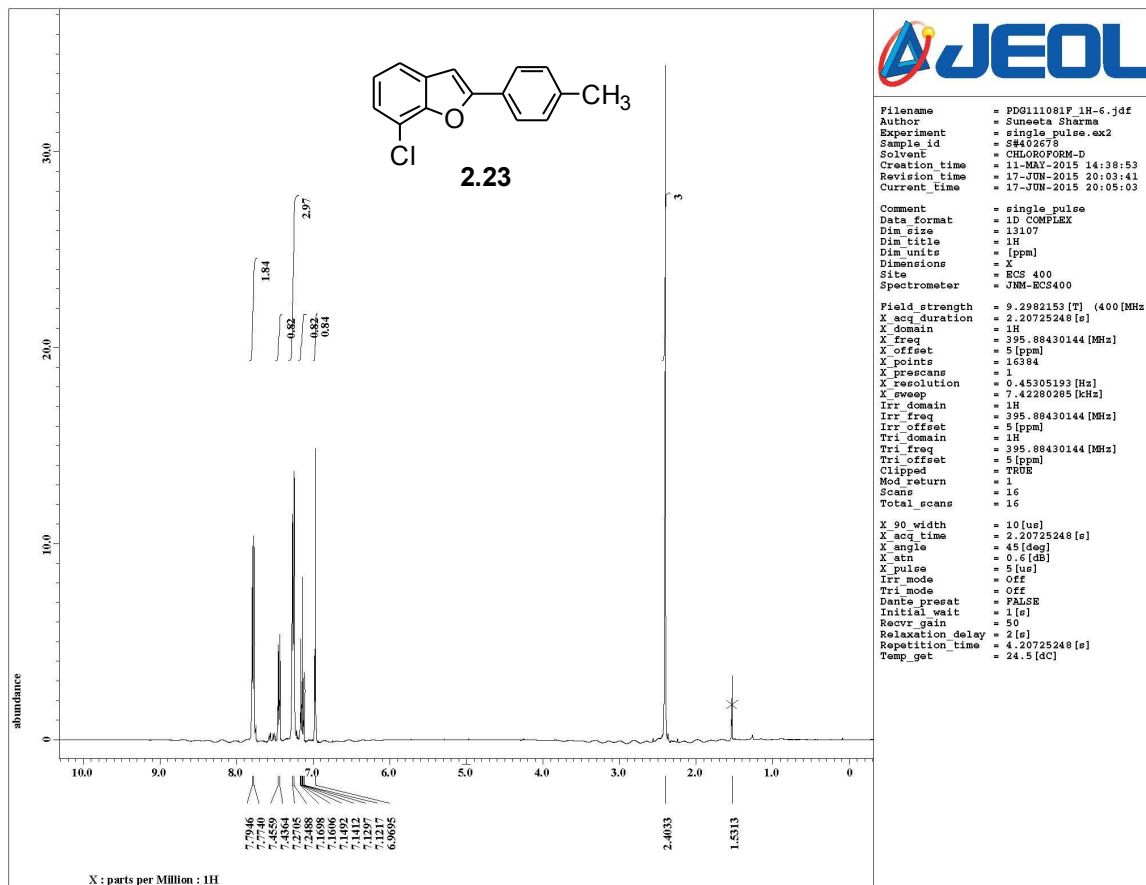

$^1\text{H}$  NMR (400 MHz,  $\text{CDCl}_3$ ) spectrum of **2.23**

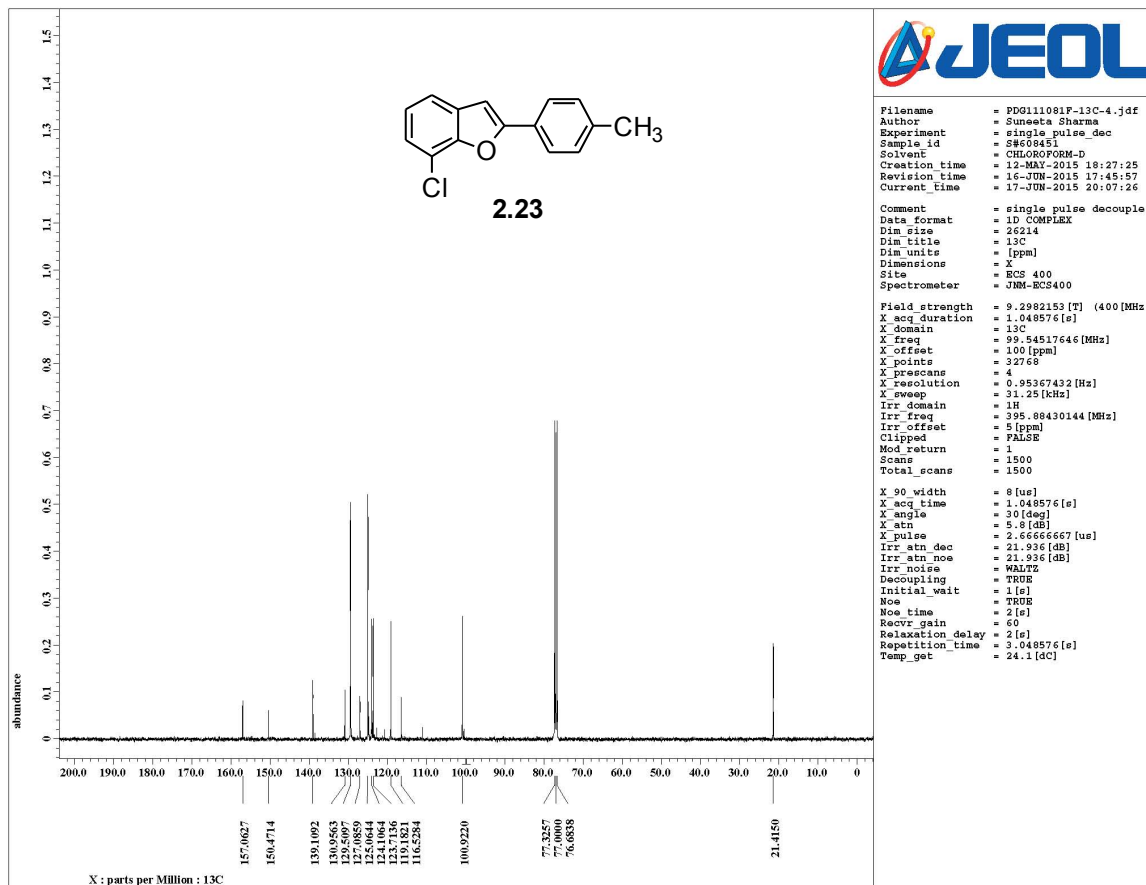

$^{13}\text{C}$  NMR (100 MHz,  $\text{CDCl}_3$ ) spectrum of **2.23**

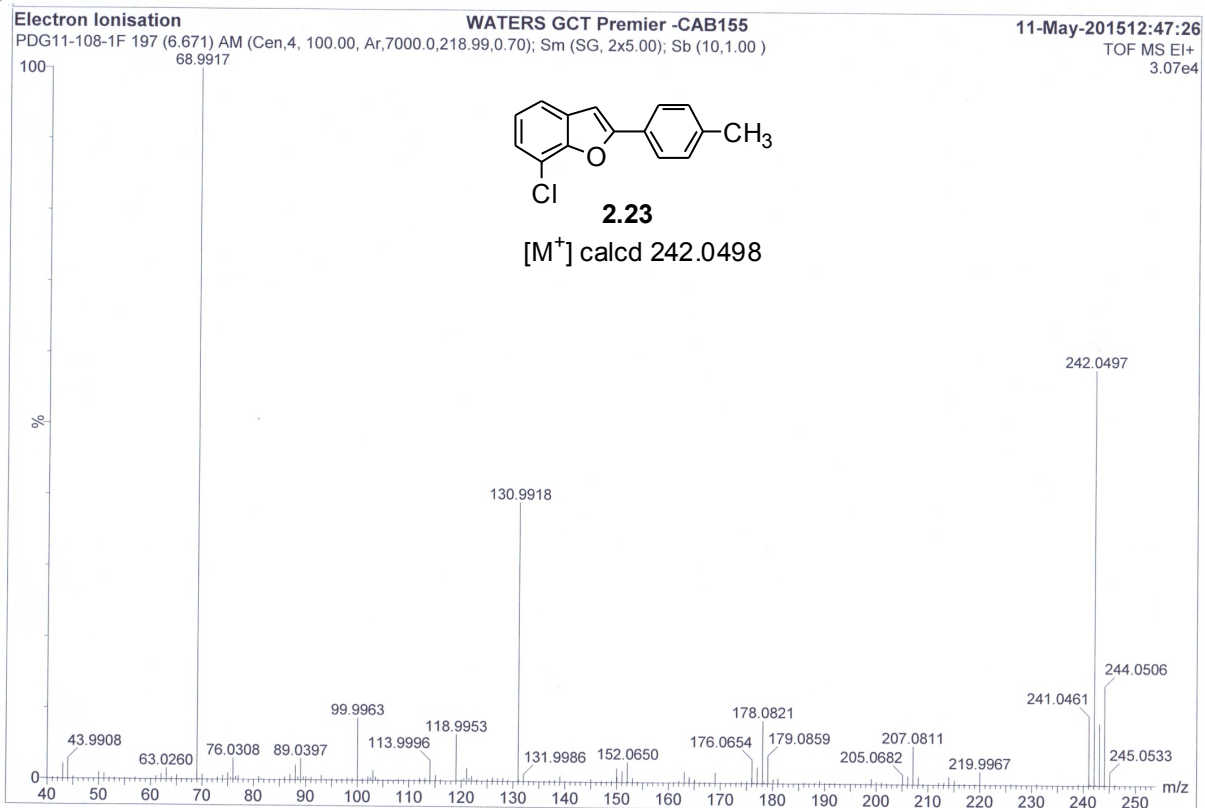

EI (HRMS) spectrum of **2.23**

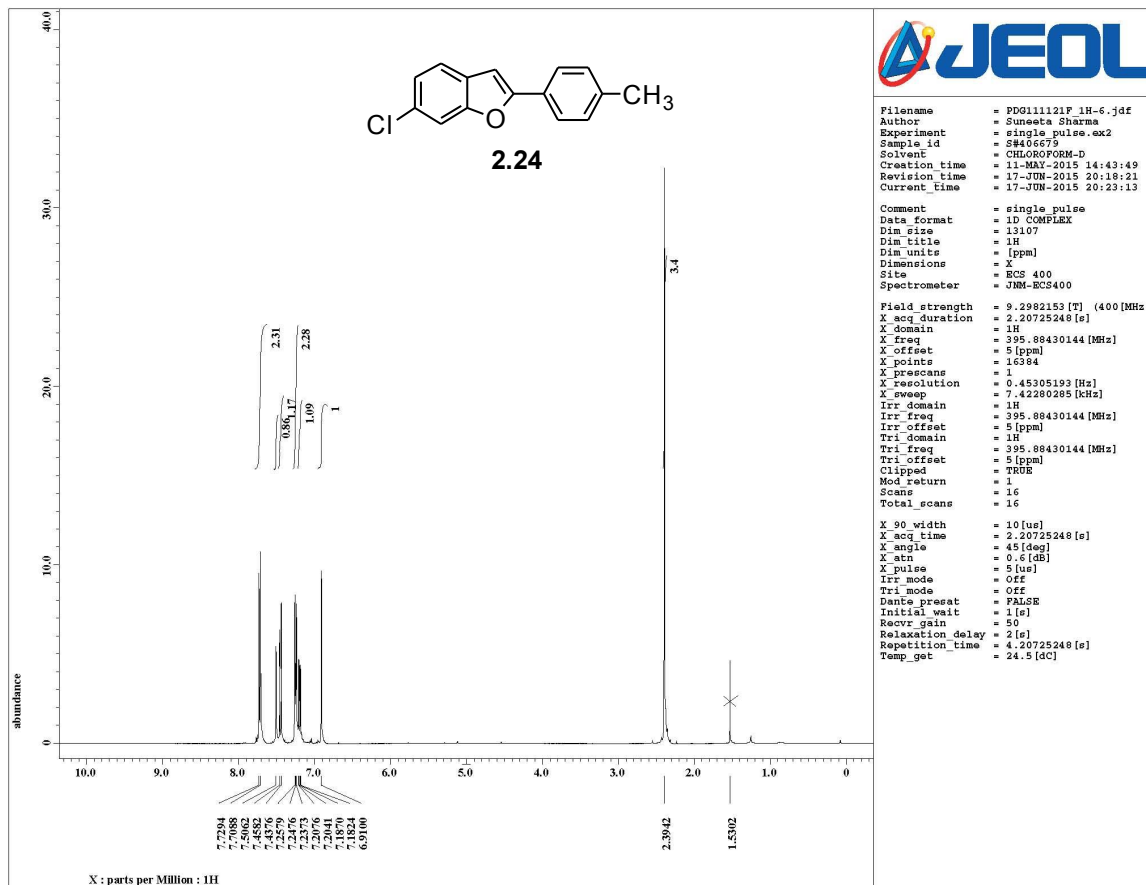

<sup>1</sup>H NMR (400 MHz, CDCl<sub>3</sub>) spectrum of **2.24**



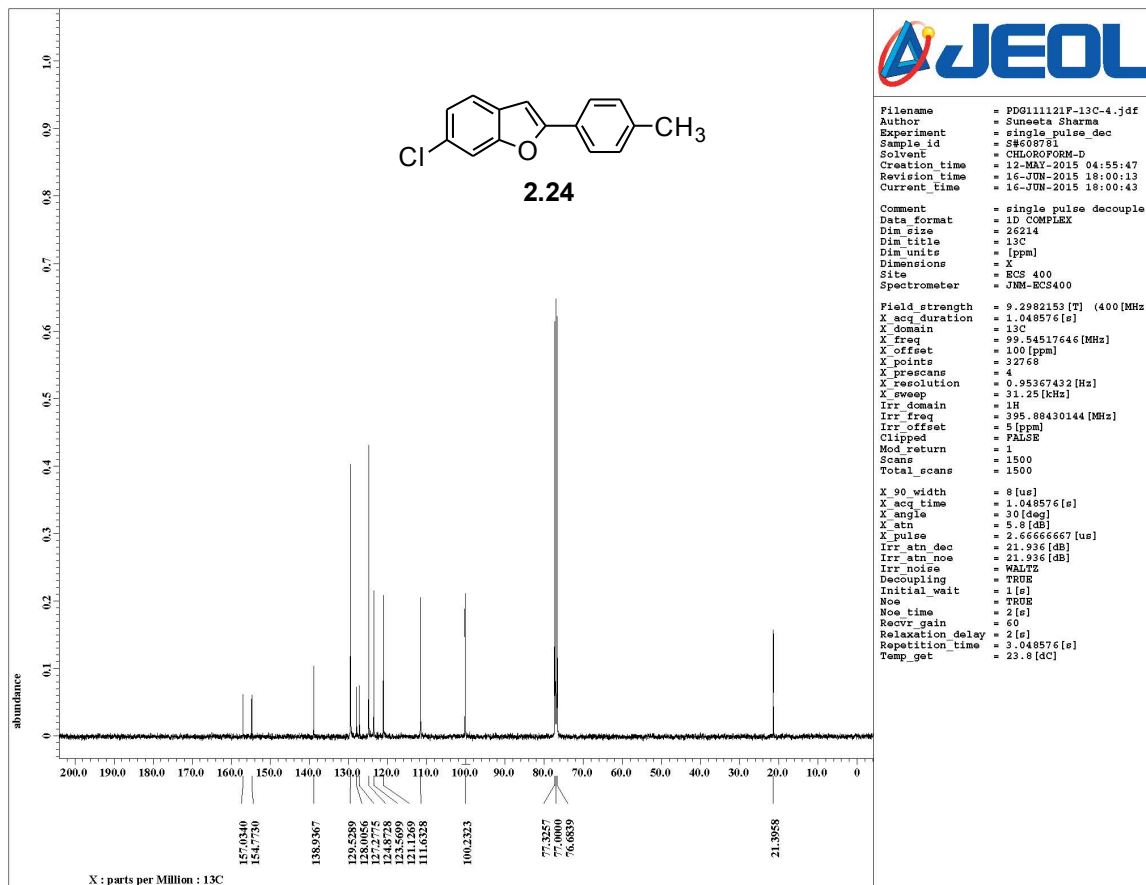

$^{13}\text{C}$  NMR (100 MHz,  $\text{CDCl}_3$ ) spectrum of **2.24**

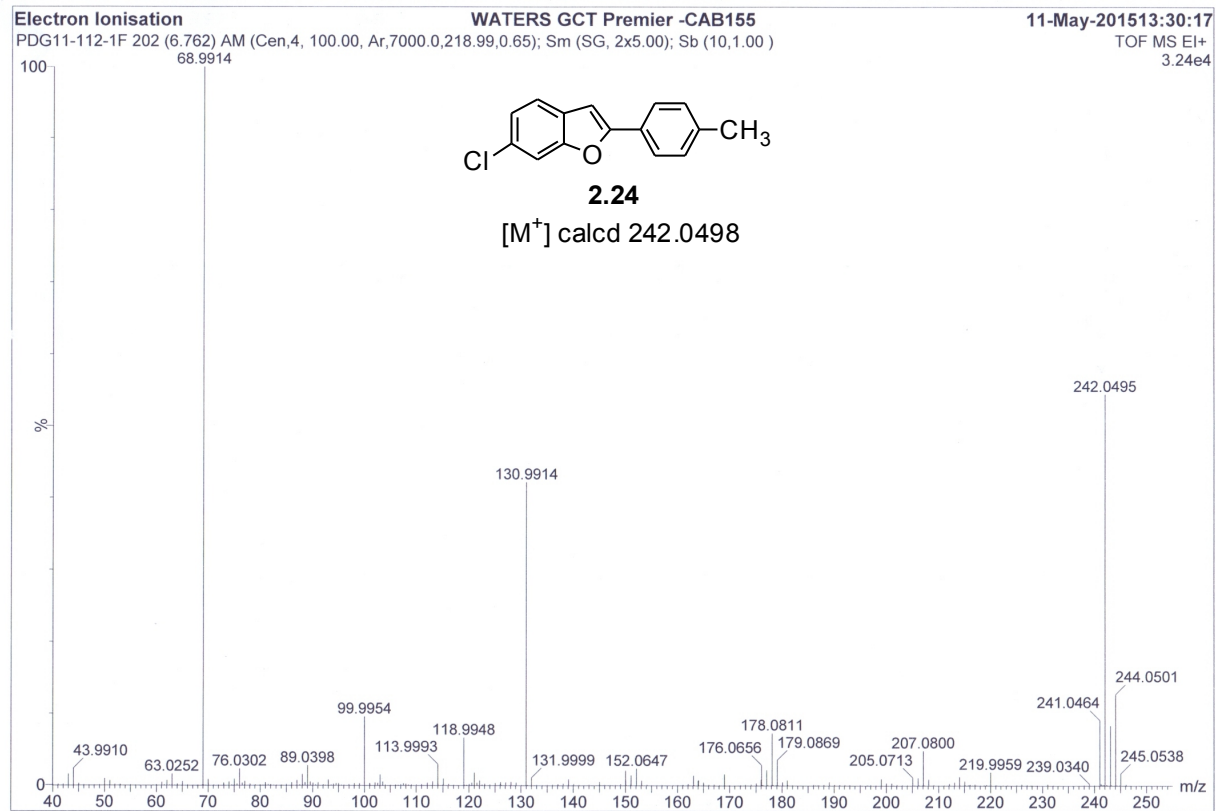

EI (HRMS) spectrum of **2.24**

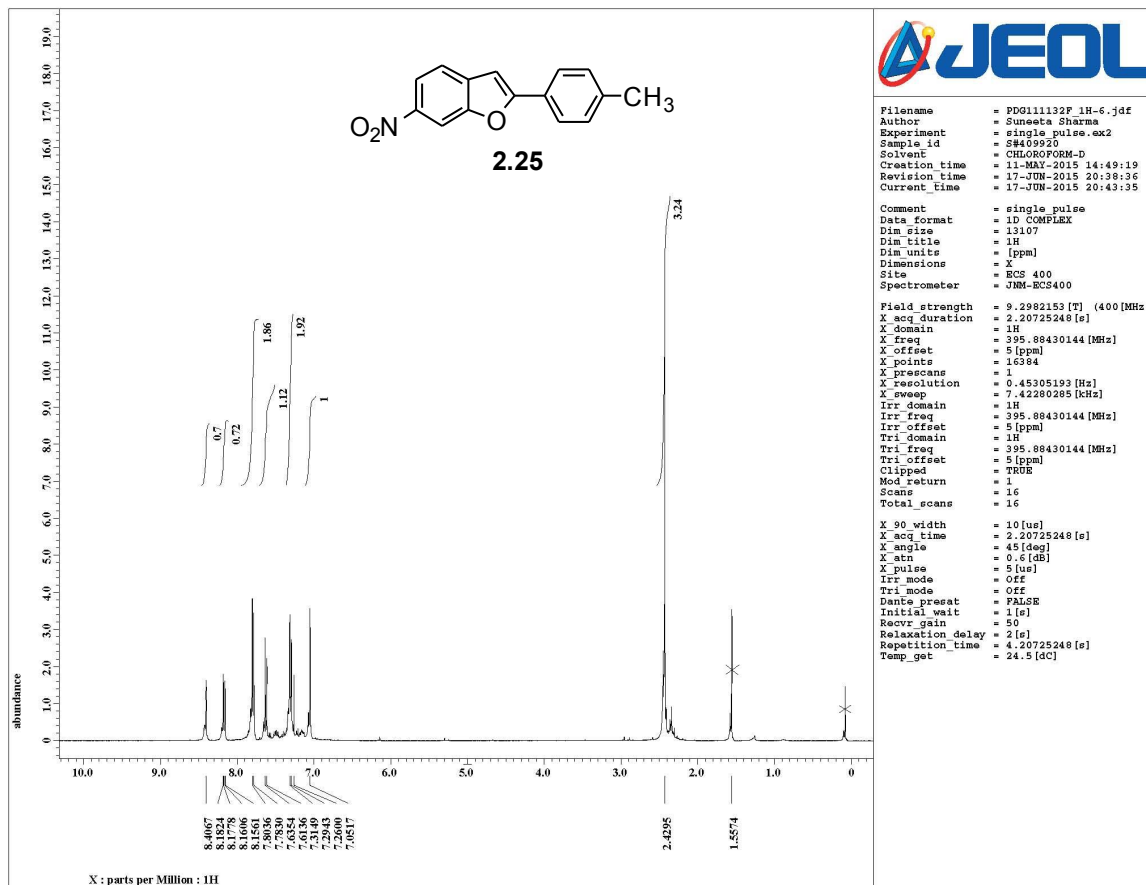

<sup>1</sup>H NMR (400 MHz, CDCl<sub>3</sub>) spectrum of **2.25**

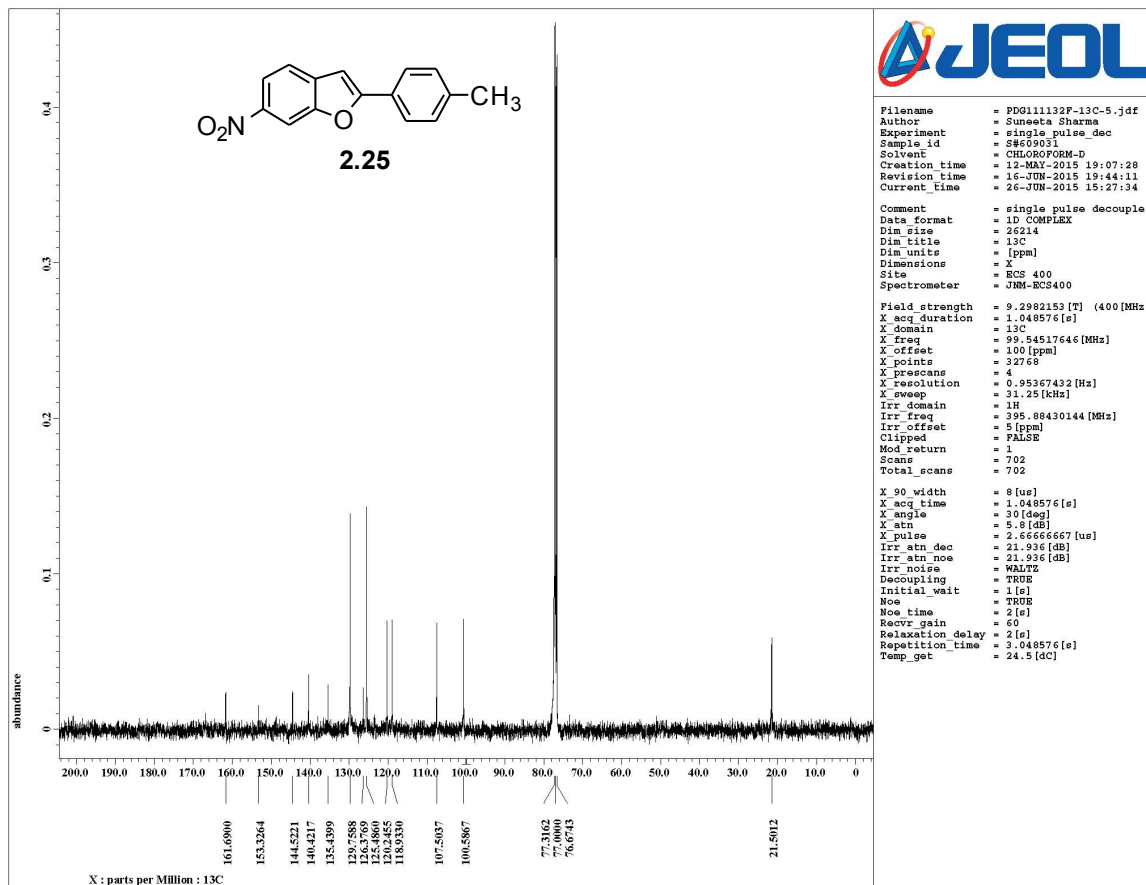

<sup>13</sup>C NMR (100 MHz, CDCl<sub>3</sub>) spectrum of **2.25**

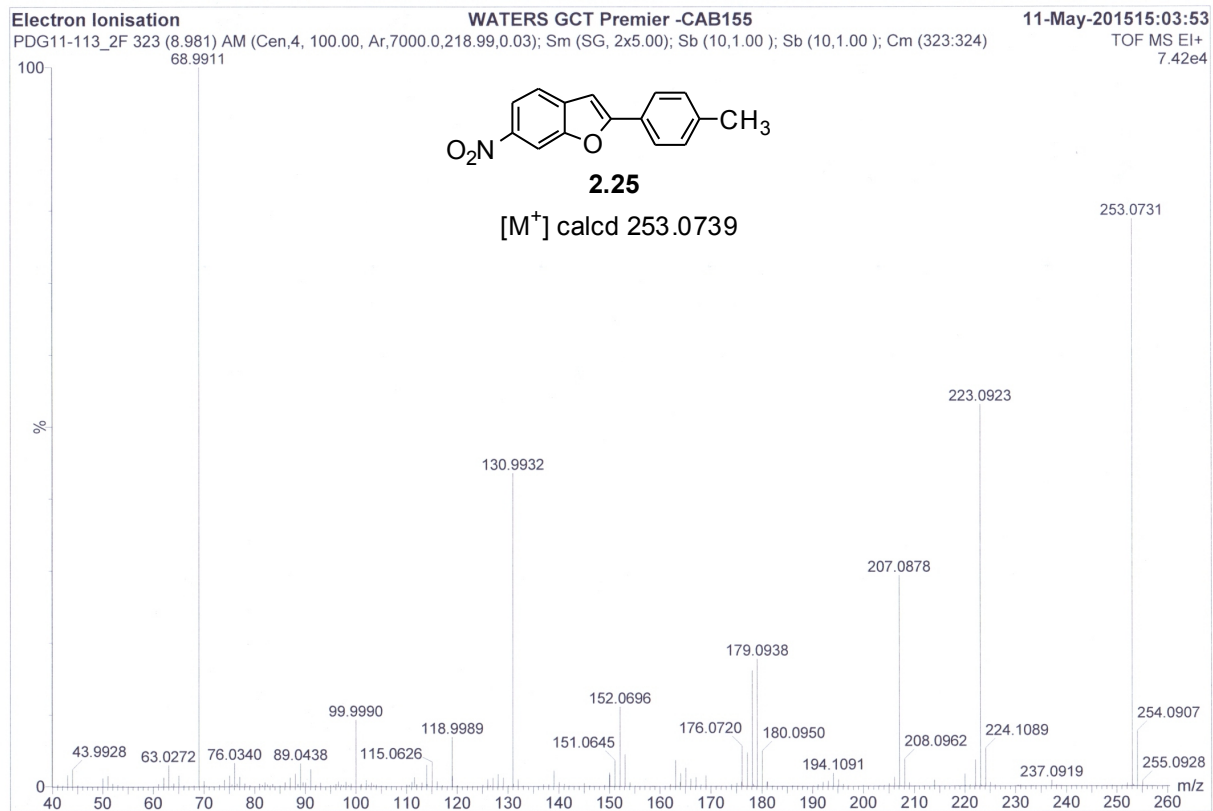

EI (HRMS) spectrum of **2.25**

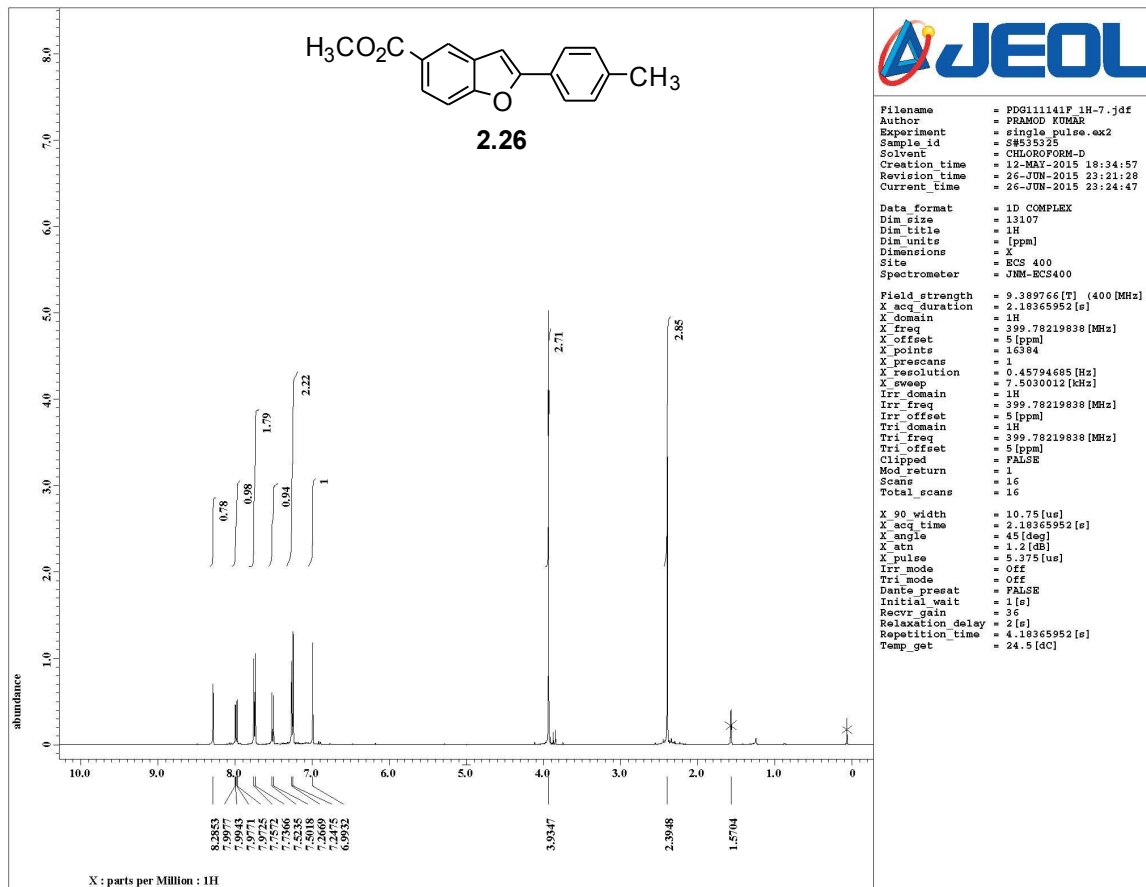

<sup>1</sup>H NMR (400 MHz, CDCl<sub>3</sub>) spectrum of **2.26**

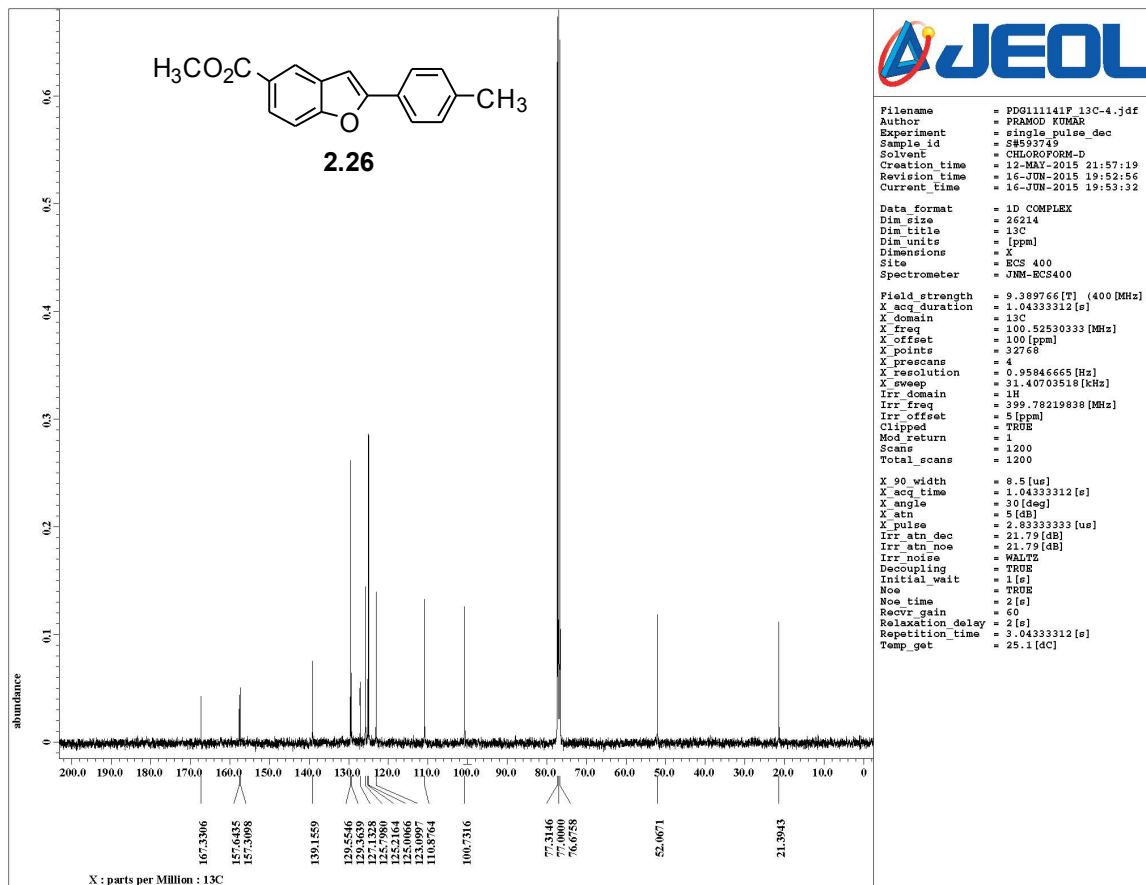

$^{13}\text{C}$  NMR (100 MHz,  $\text{CDCl}_3$ ) spectrum of **2.26**

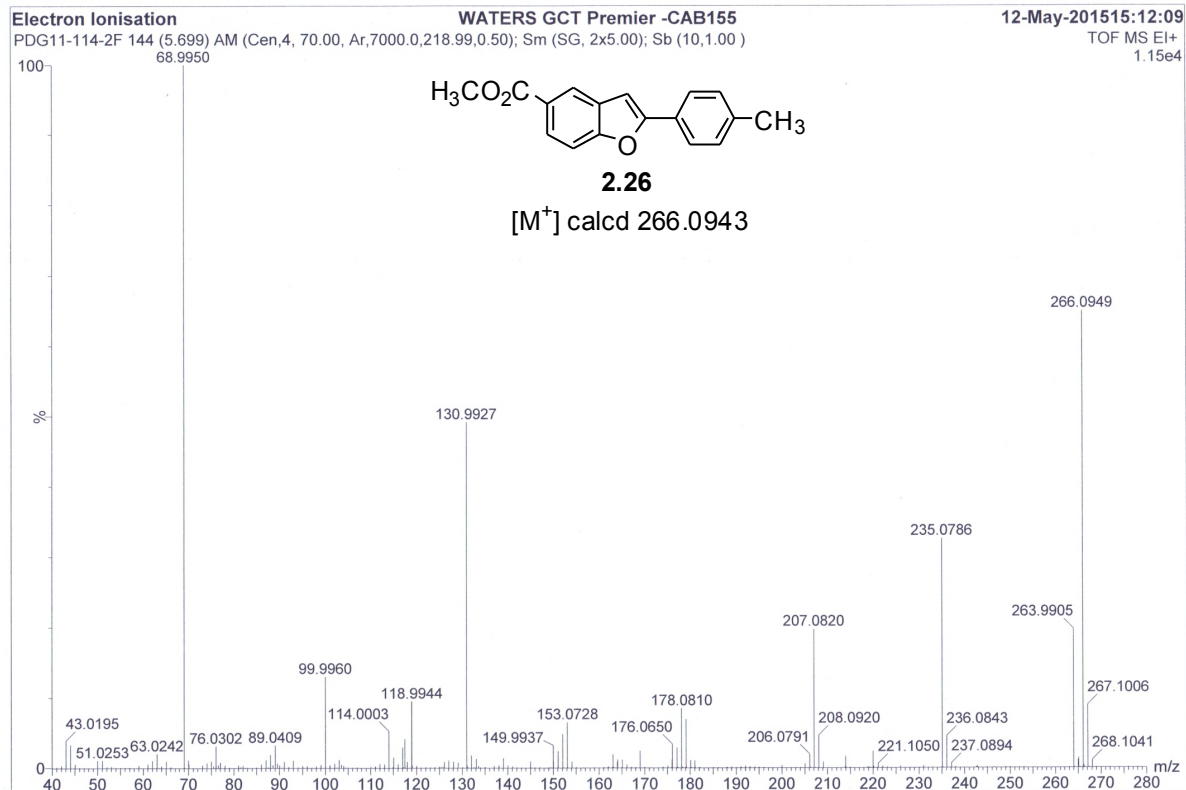

EI (HRMS) spectrum of **2.26**





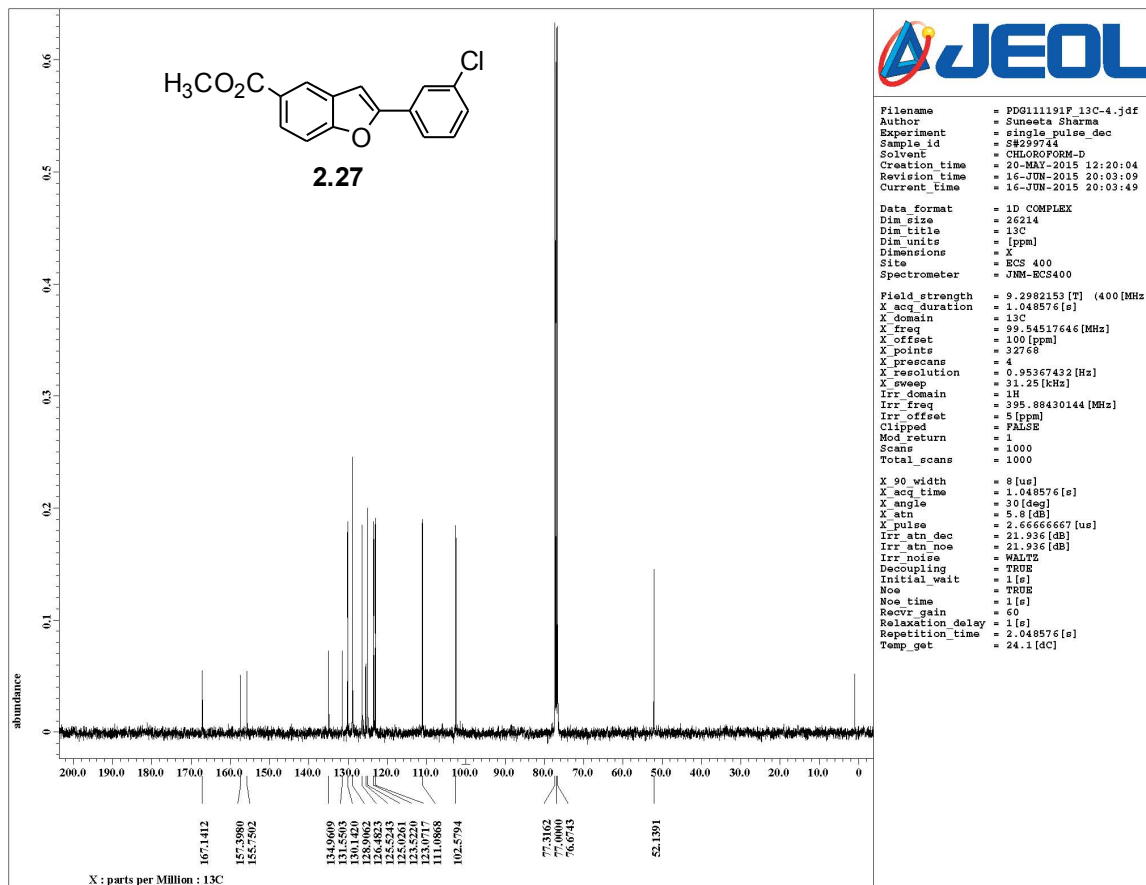

$^{13}\text{C}$  NMR (100 MHz,  $\text{CDCl}_3$ ) spectrum of **2.27**

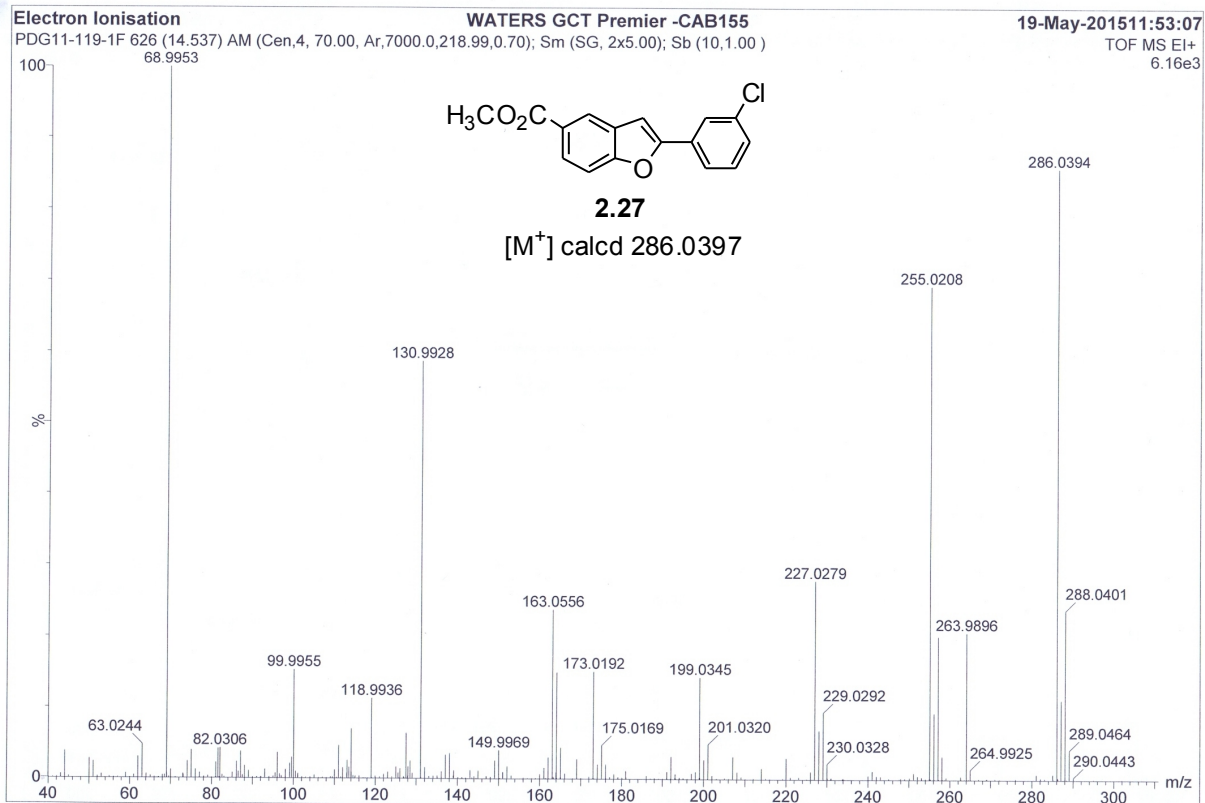

EI (HRMS) spectrum of **2.27**

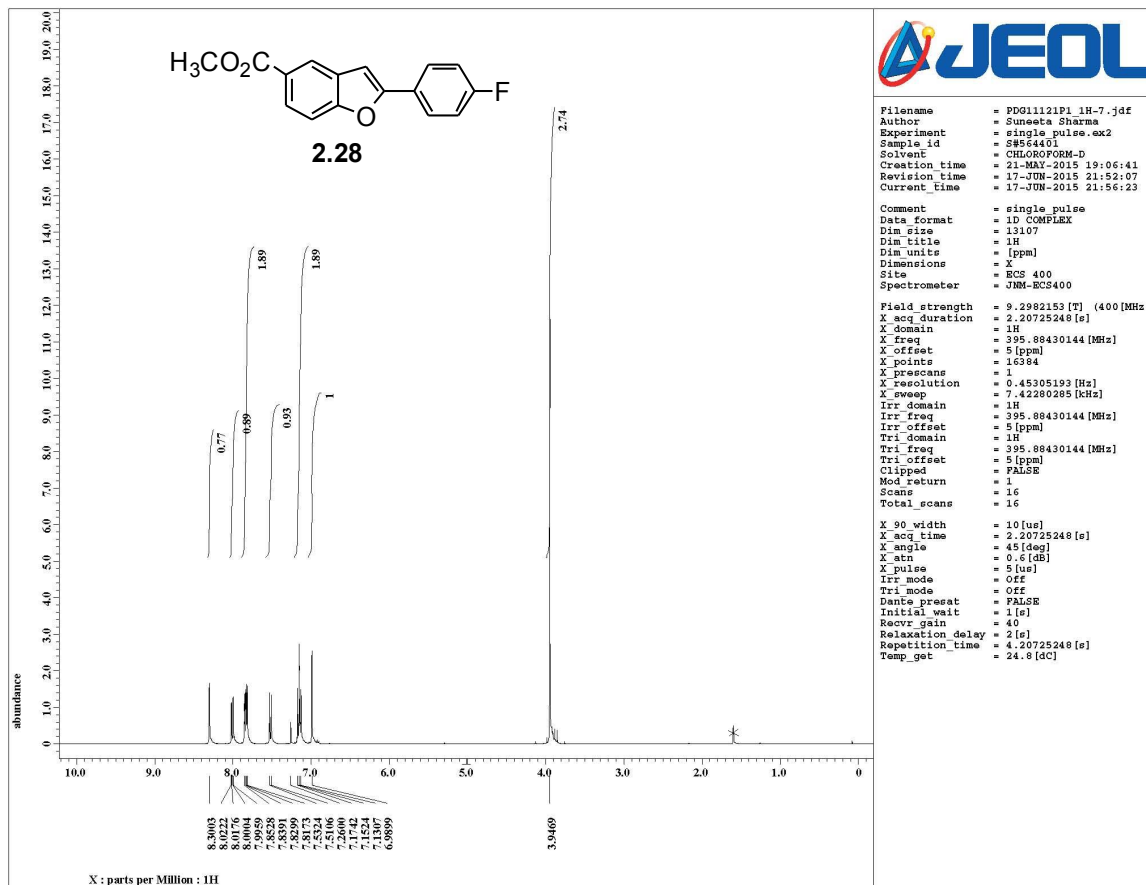

<sup>1</sup>H NMR (400 MHz, CDCl<sub>3</sub>) spectrum of **2.28**

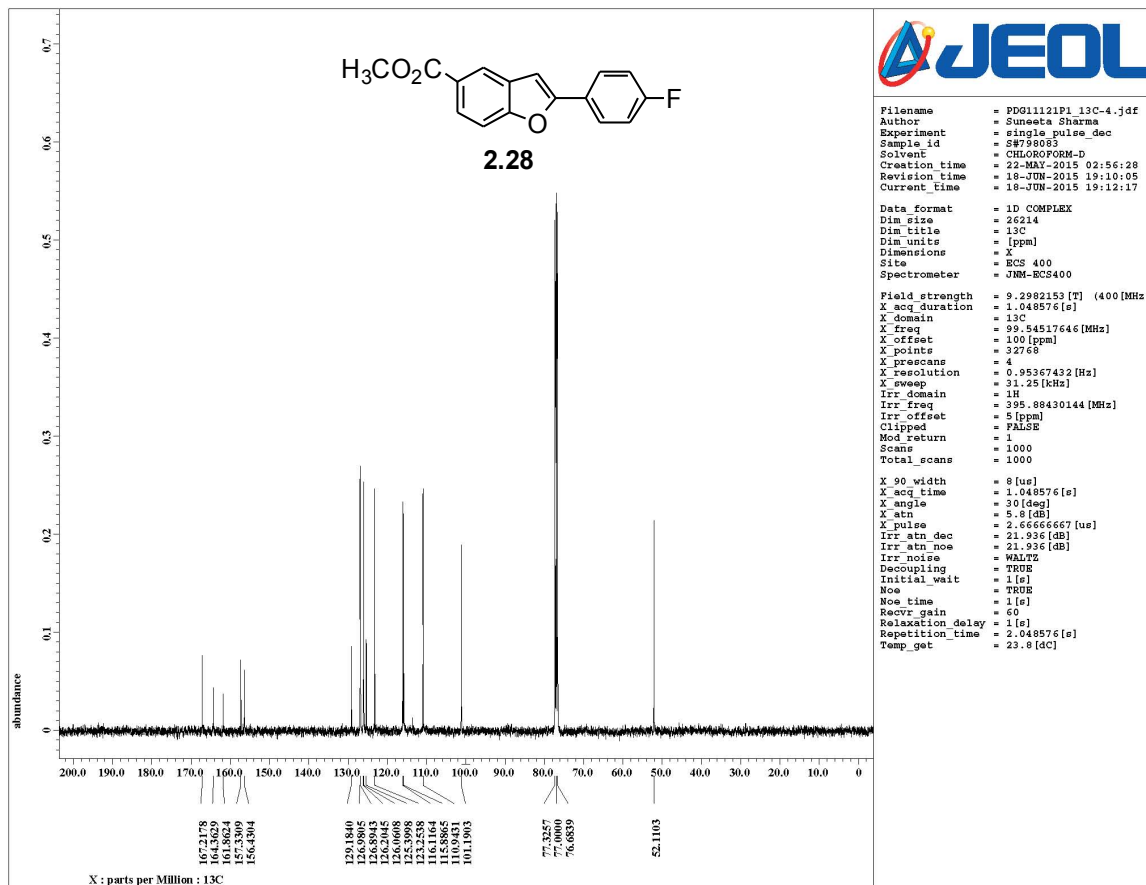

$^{13}\text{C}$  NMR (100 MHz,  $\text{CDCl}_3$ ) spectrum of **2.28**

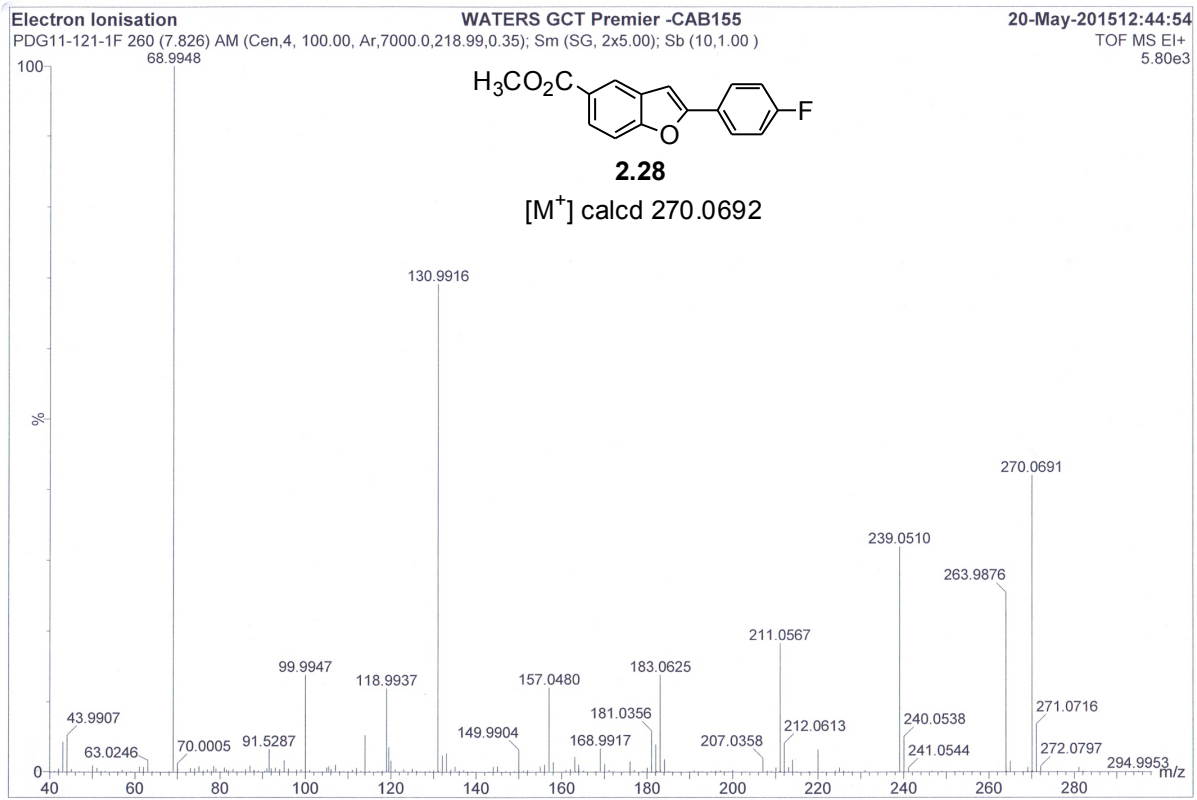

EI (HRMS) spectrum of **2.28**

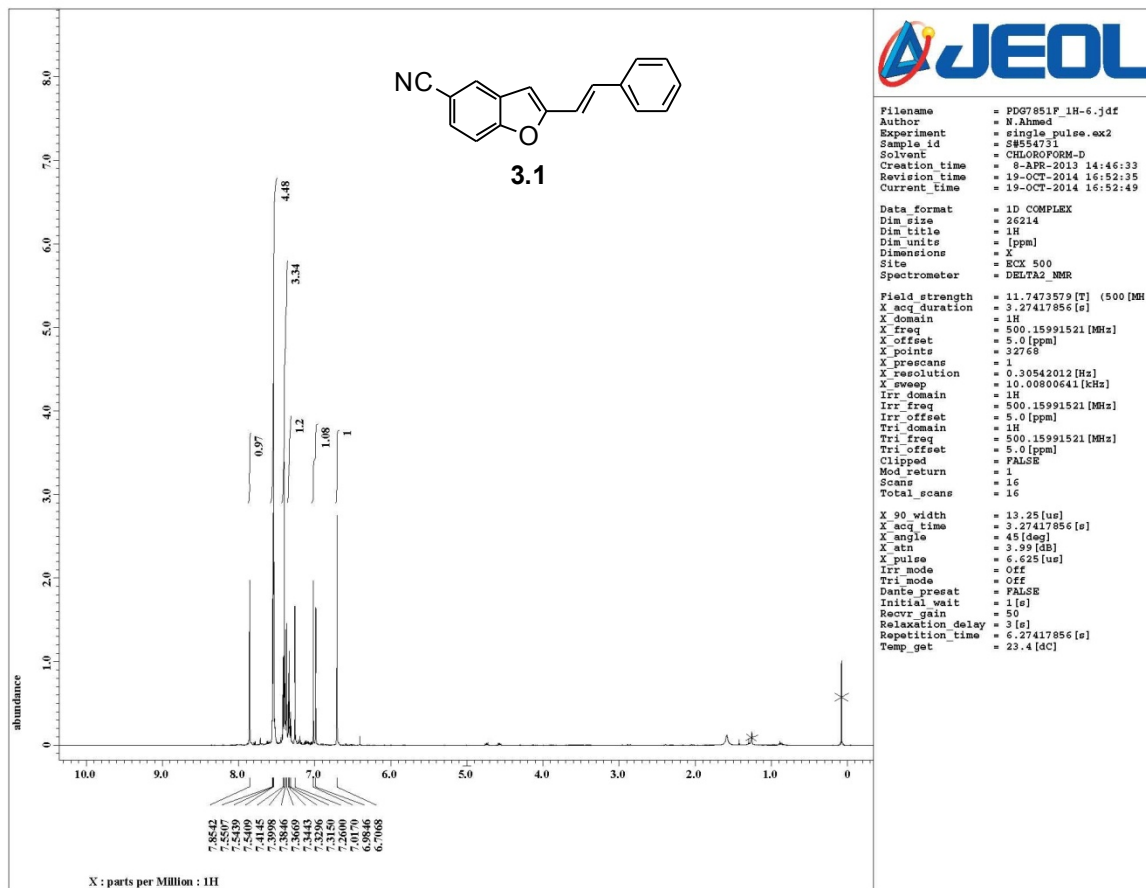

<sup>1</sup>H NMR (500 MHz, CDCl<sub>3</sub>) spectrum of **3.1**

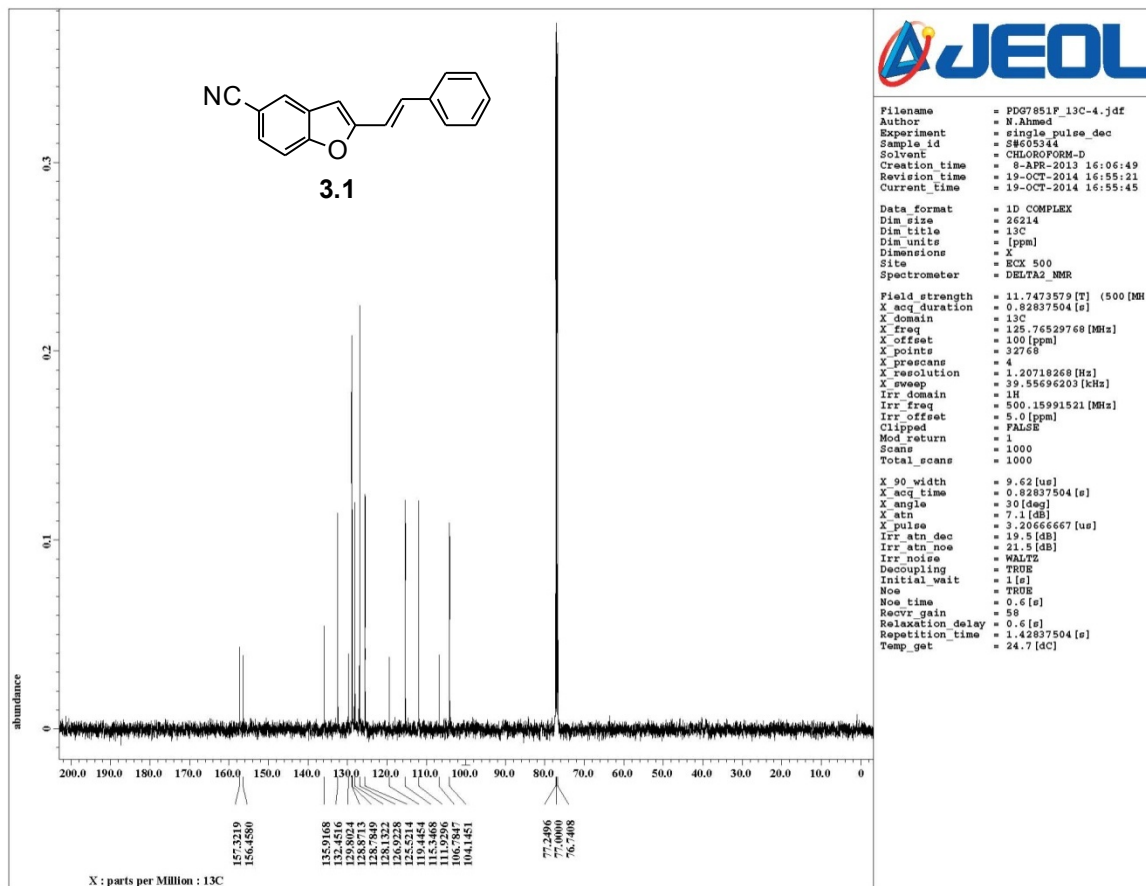

$^{13}\text{C}$  NMR (125 MHz,  $\text{CDCl}_3$ ) spectrum of **3.1**



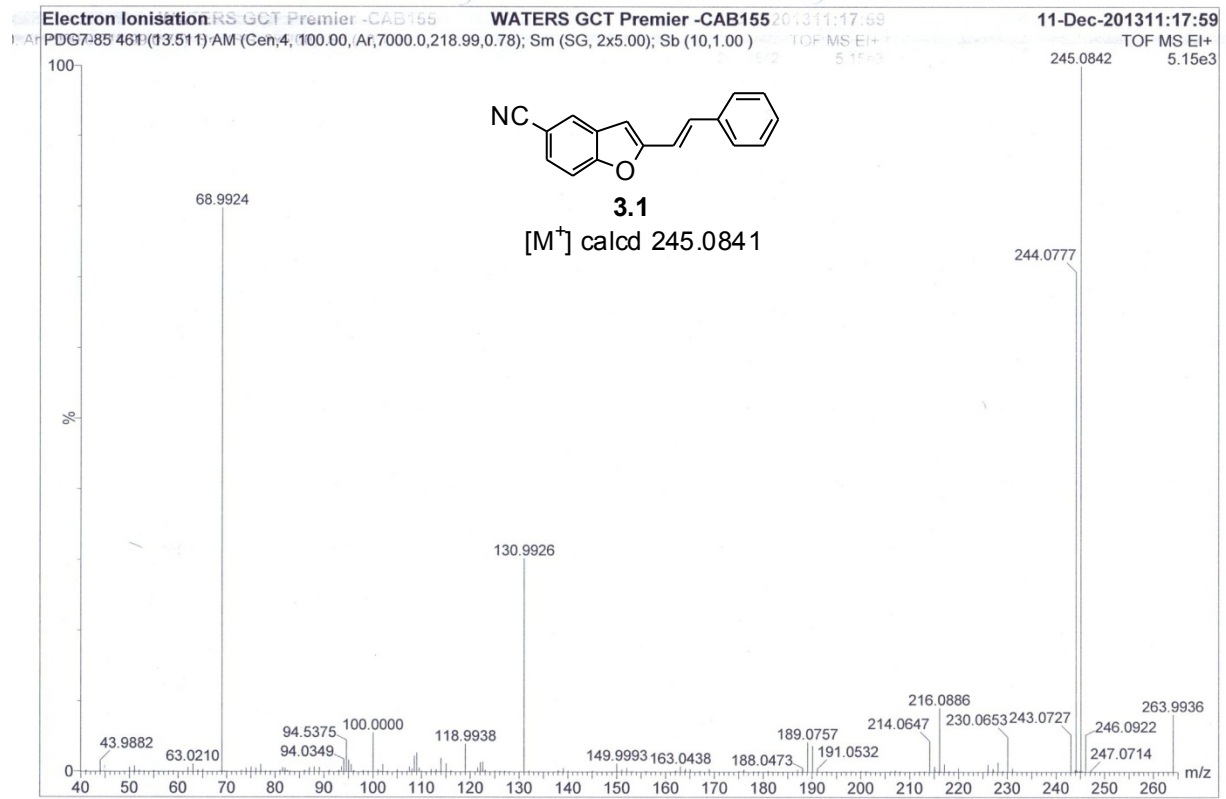

EI (HRMS) spectrum of **3.1**

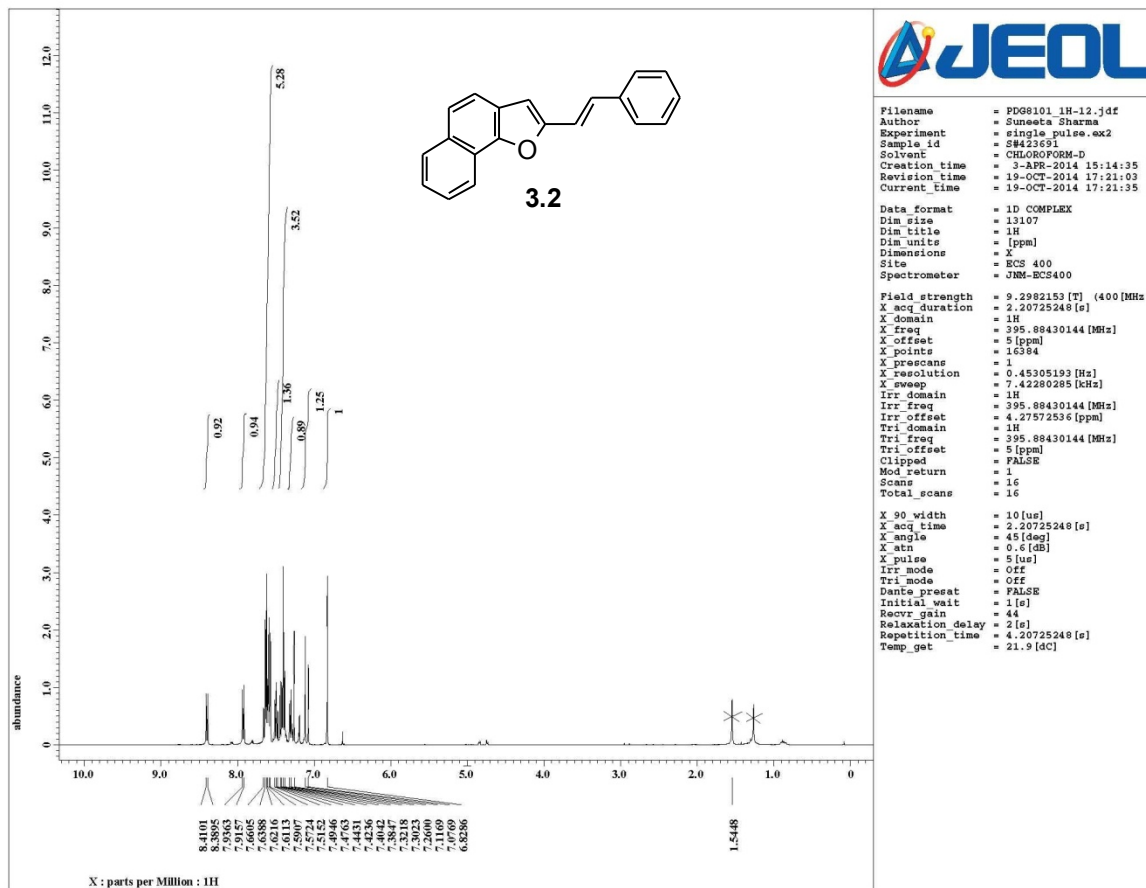

<sup>1</sup>H NMR (400 MHz, CDCl<sub>3</sub>) spectrum of **3.2**

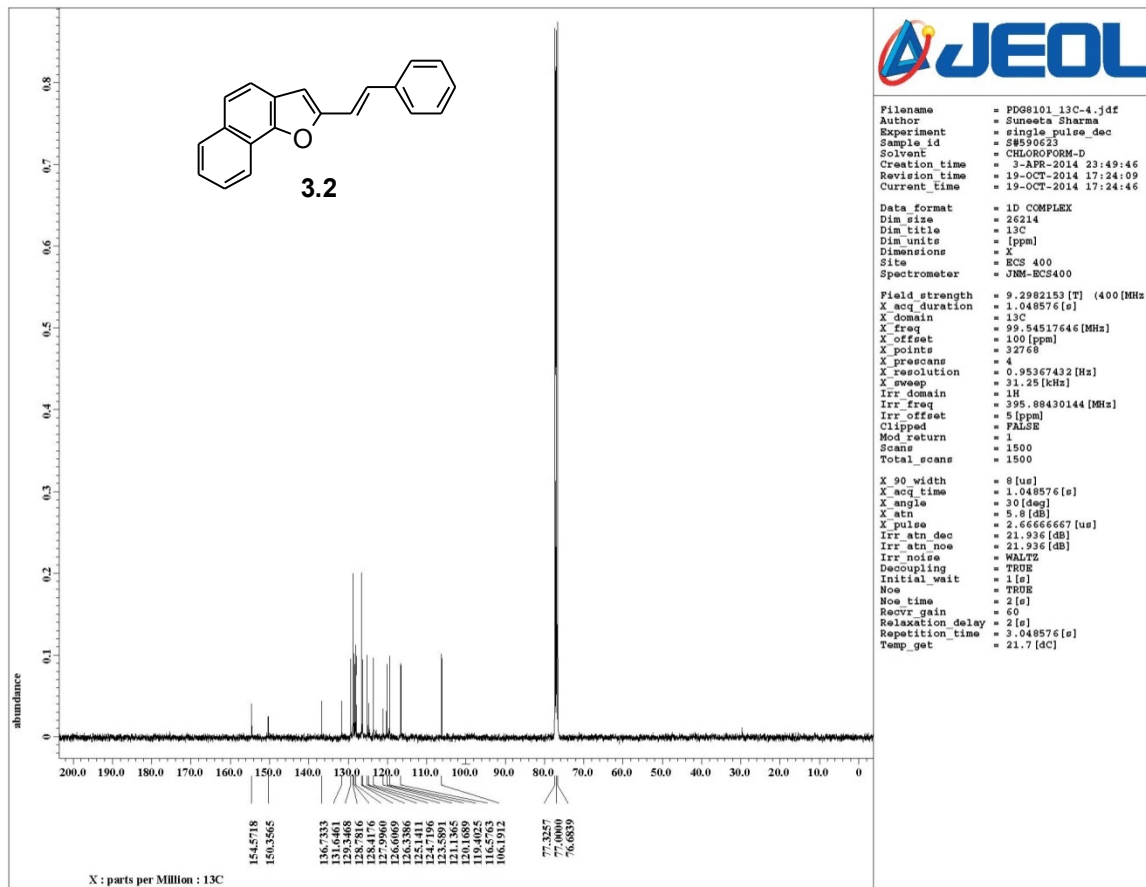

$^{13}\text{C}$  NMR (100 MHz,  $\text{CDCl}_3$ ) spectrum of **3.2**

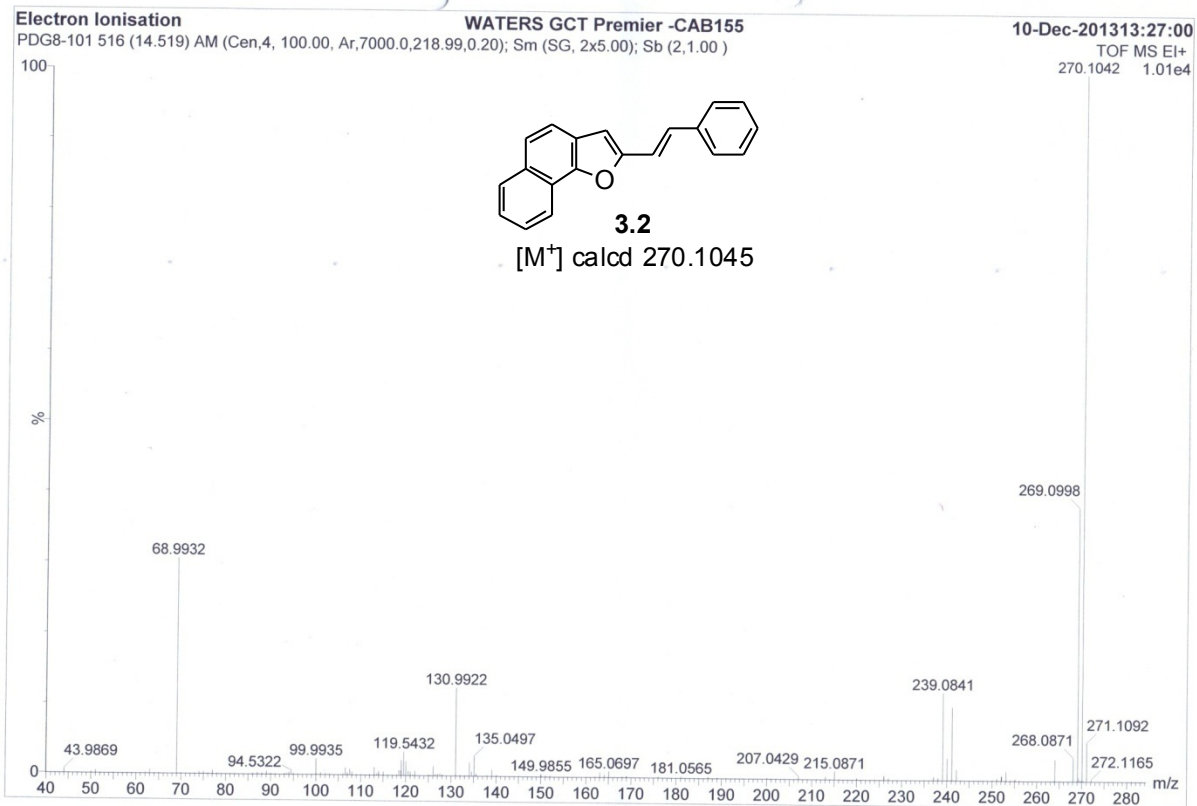

EI (HRMS) spectrum of **3.2**

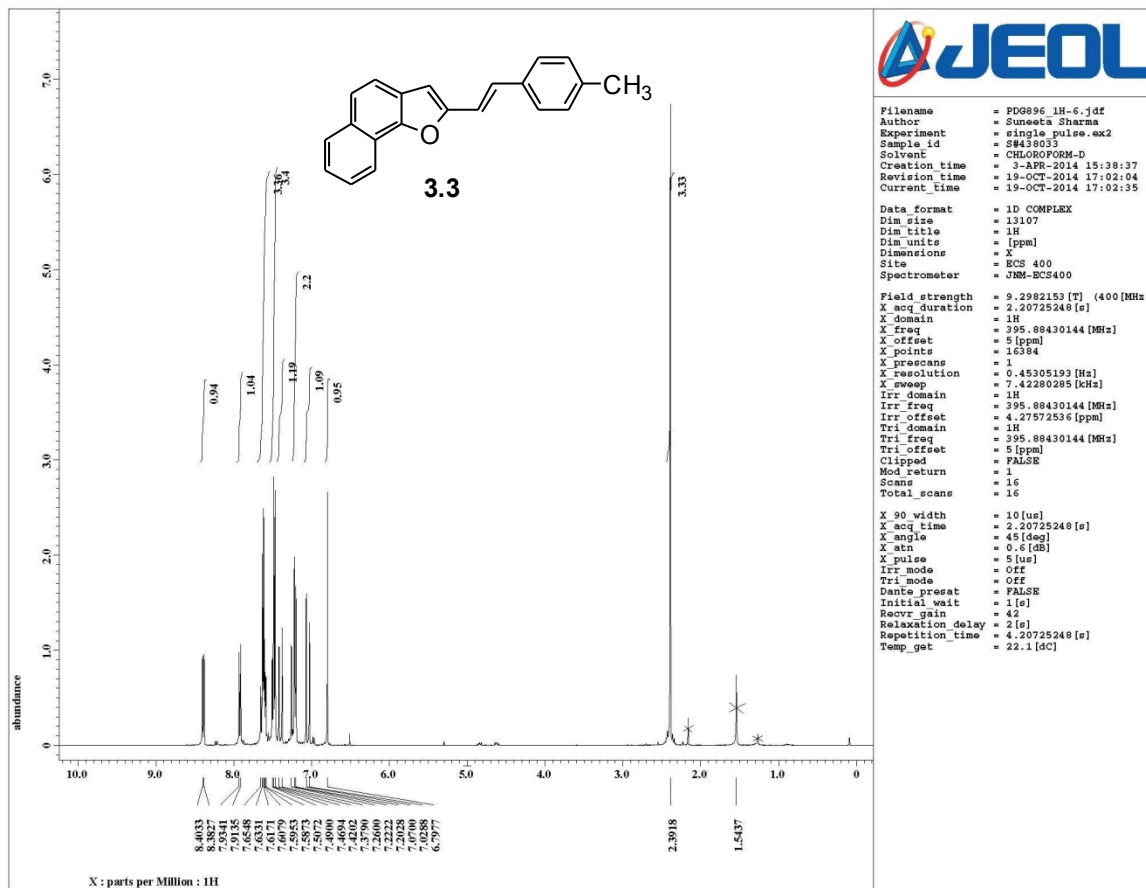

<sup>1</sup>H NMR (400 MHz, CDCl<sub>3</sub>) spectrum of **3.3**

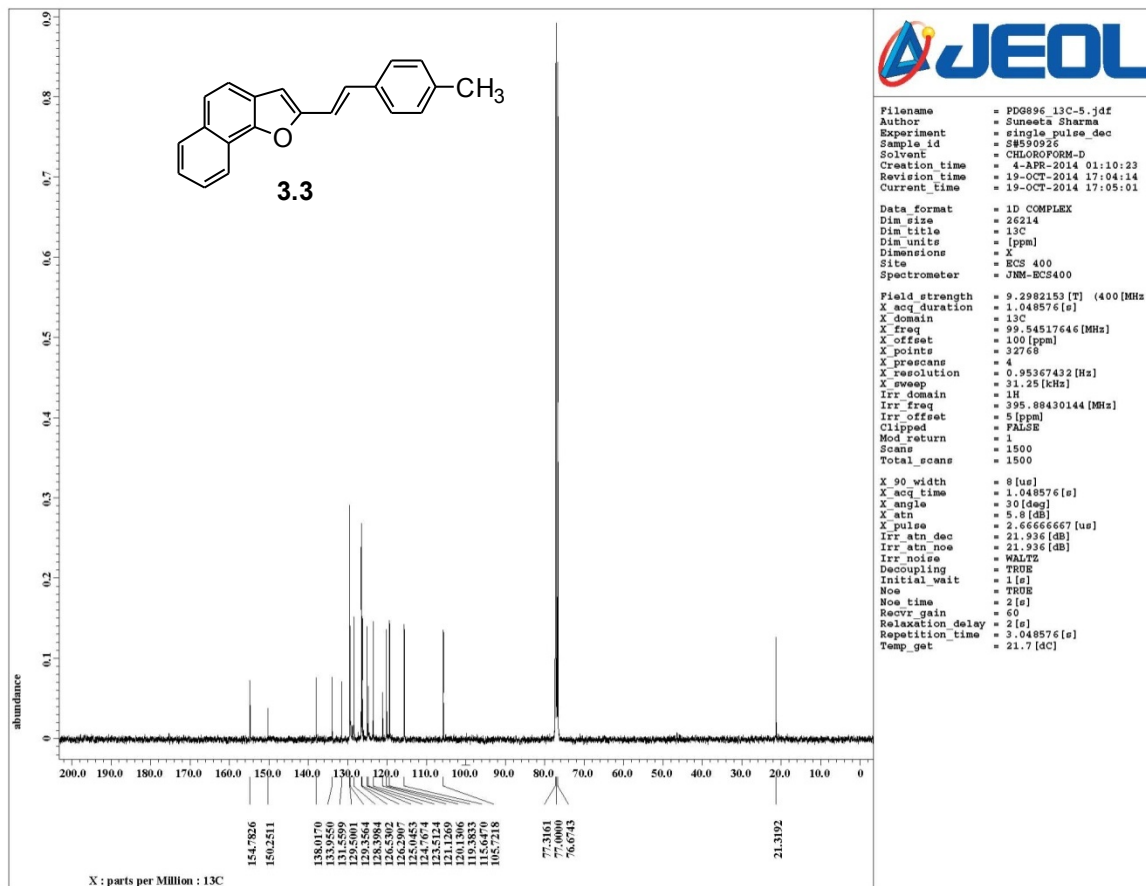

$^{13}\text{C}$  NMR (100 MHz,  $\text{CDCl}_3$ ) spectrum of **3.3**

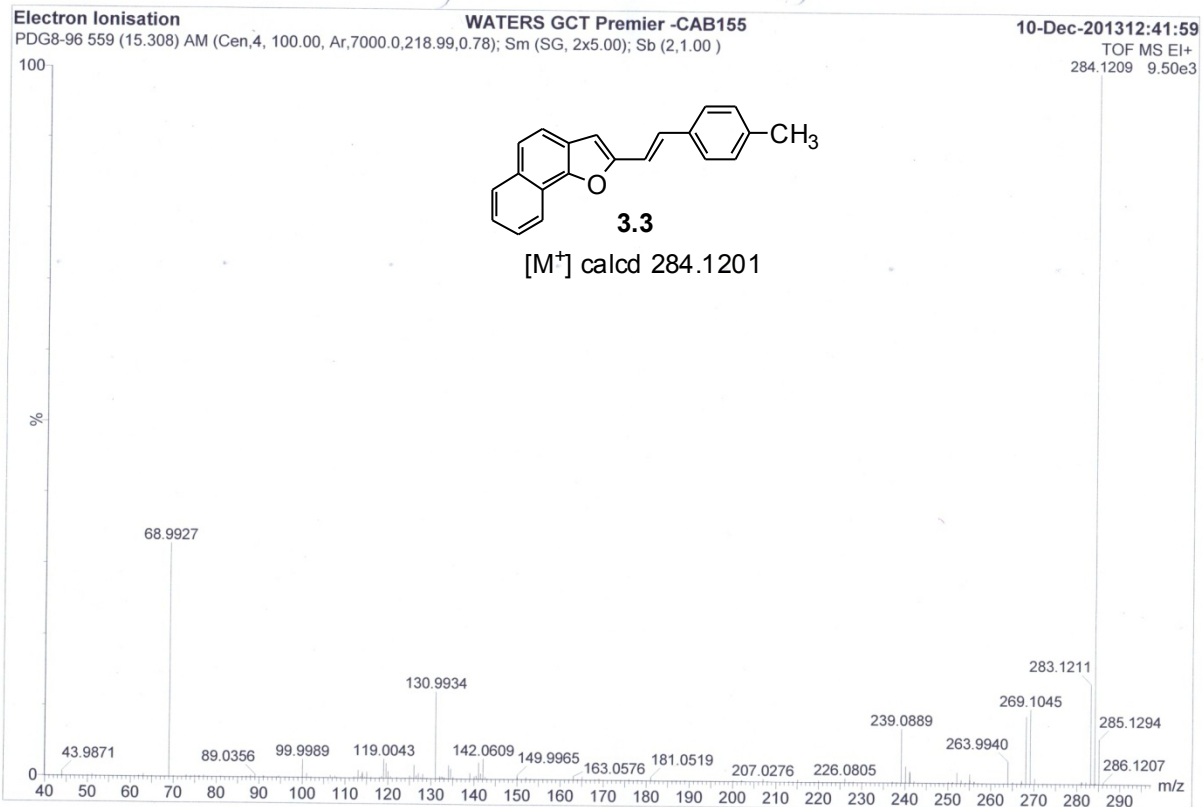

EI (HRMS) spectrum of **3.3**

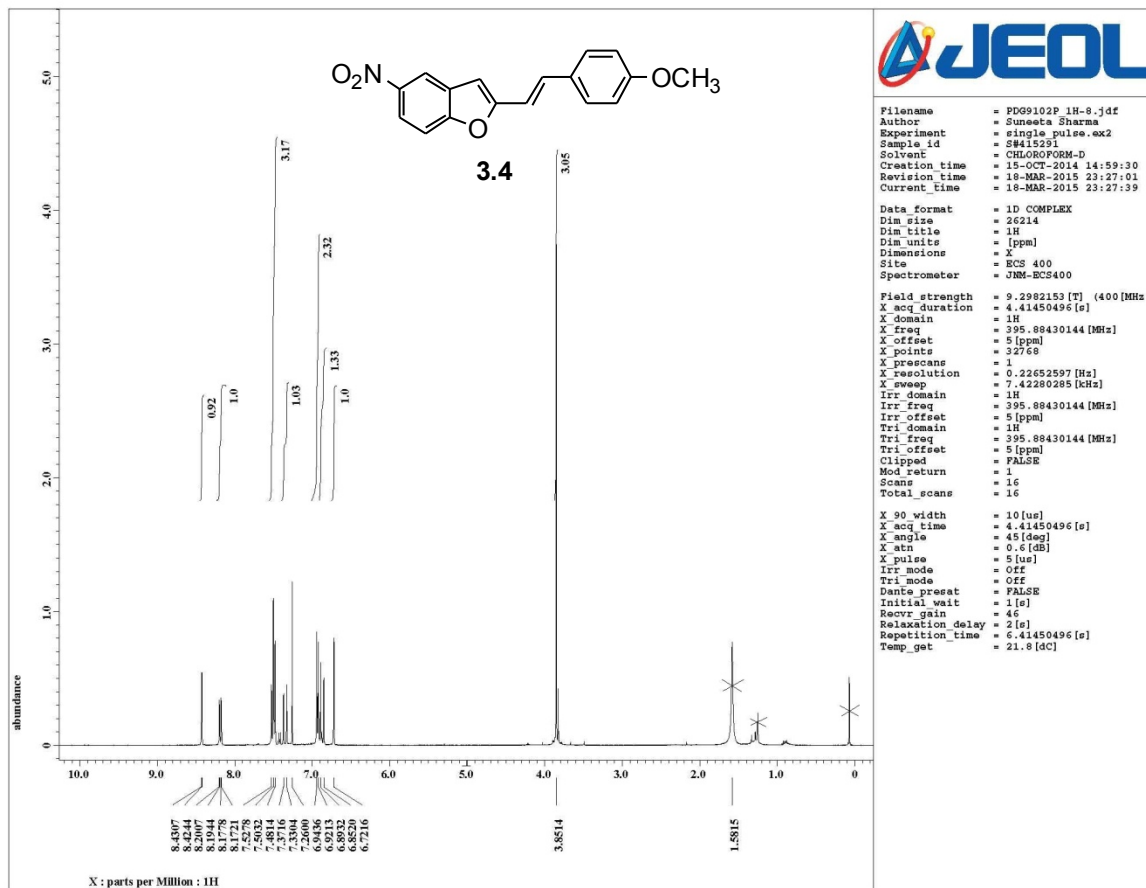

<sup>1</sup>H NMR (400 MHz, CDCl<sub>3</sub>) spectrum of **3.4**



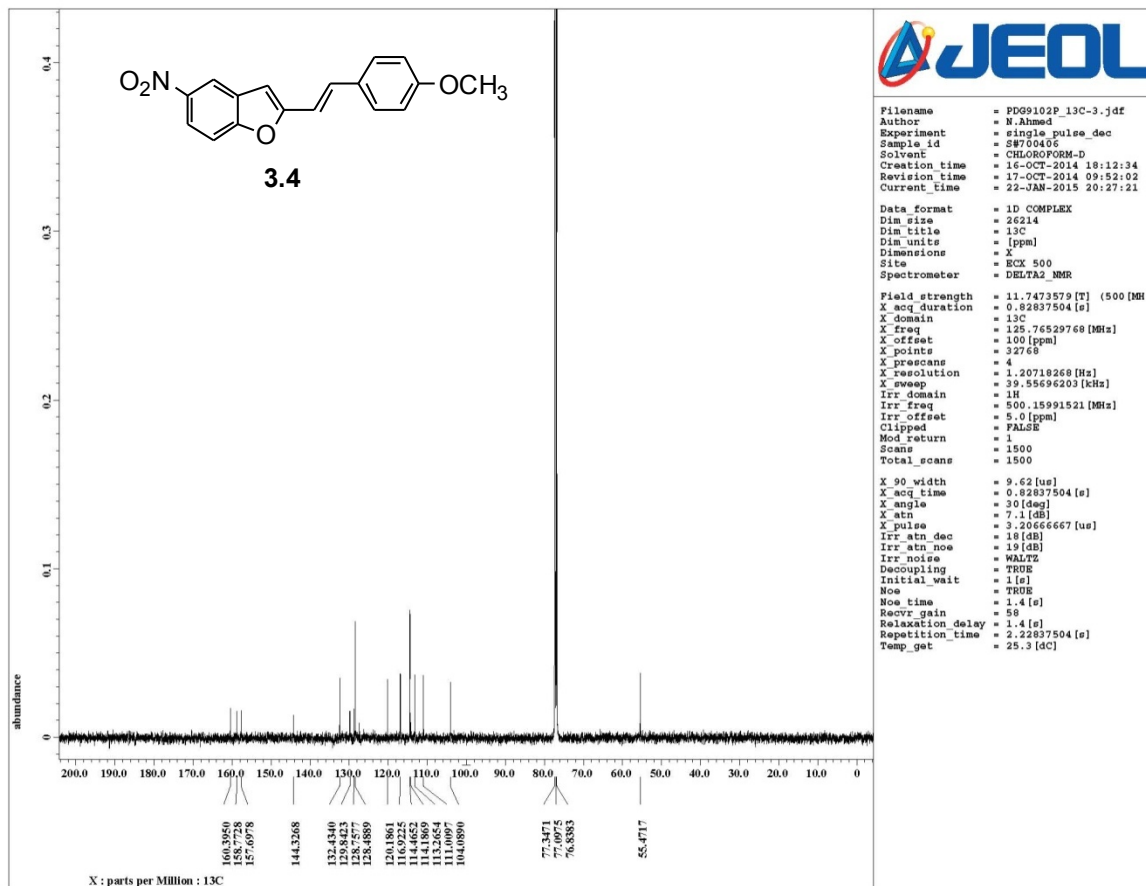

$^{13}\text{C}$  NMR (125 MHz,  $\text{CDCl}_3$ ) spectrum of **3.4**

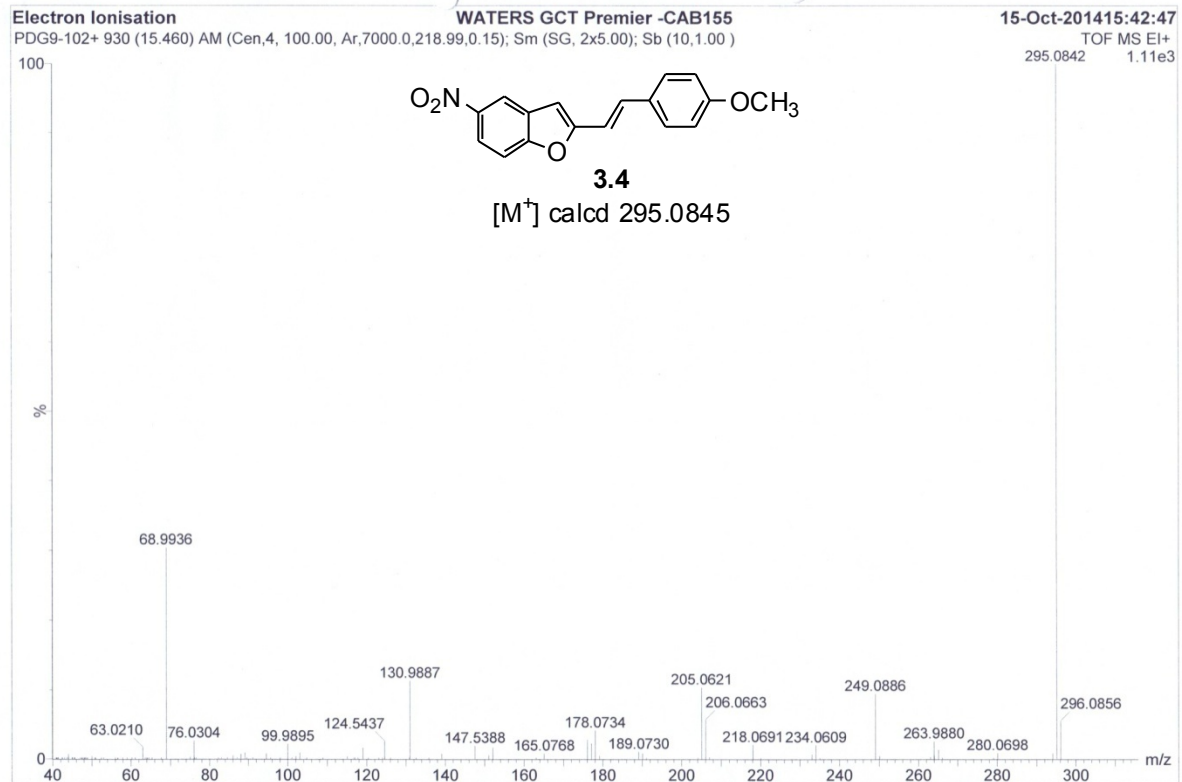

EI (HRMS) spectrum of **3.4**

## 8. $^1\text{H}$ , $^{13}\text{C}$ and HRMS spectra of intermediates 4c and 5c:

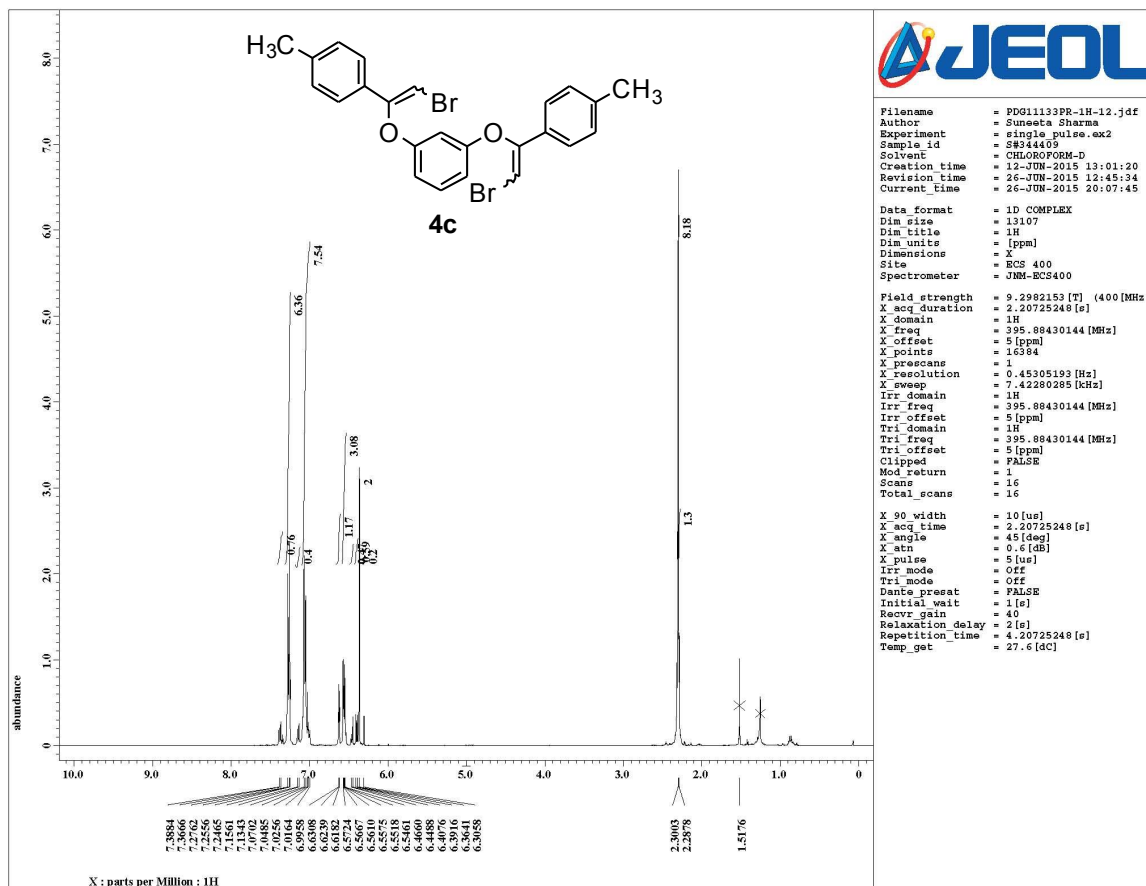

$^1\text{H}$  NMR (400 MHz,  $\text{CDCl}_3$ ) spectrum of 4c

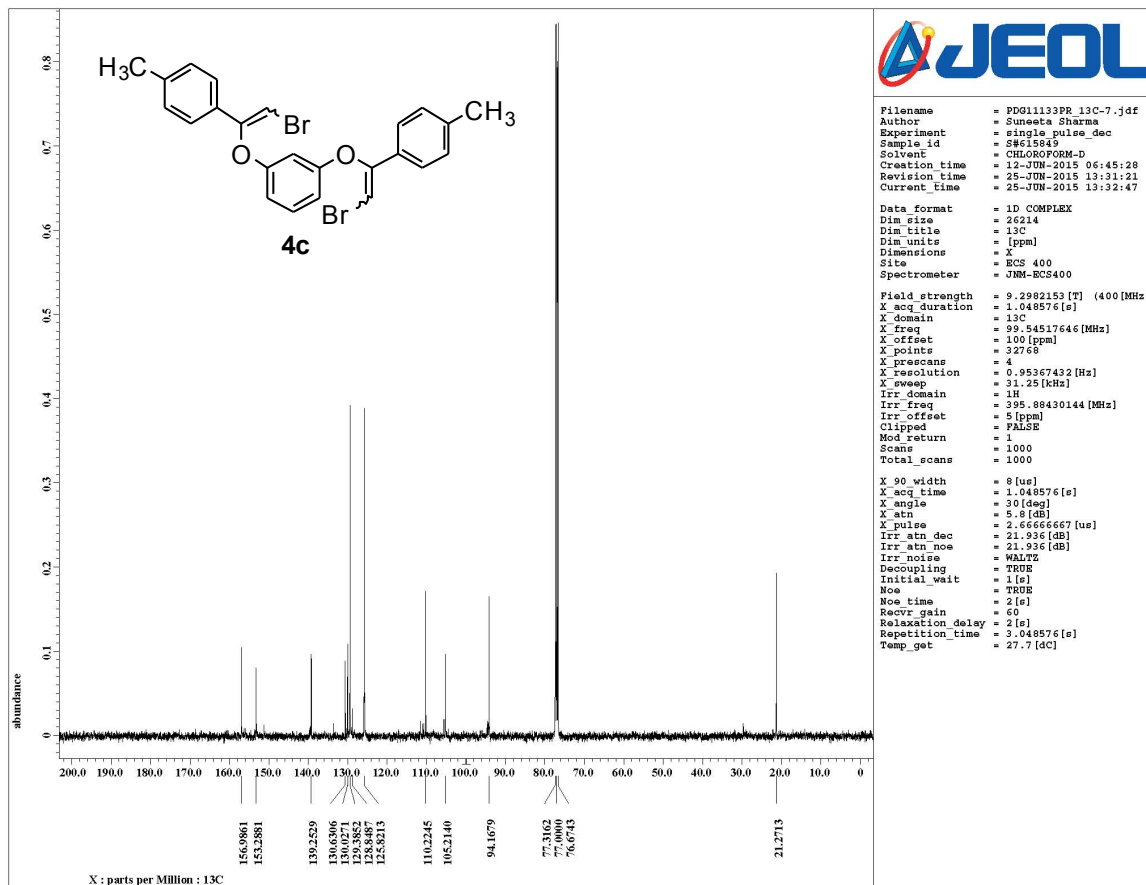

<sup>13</sup>C NMR (100 MHz, CDCl<sub>3</sub>) spectrum of **4c**

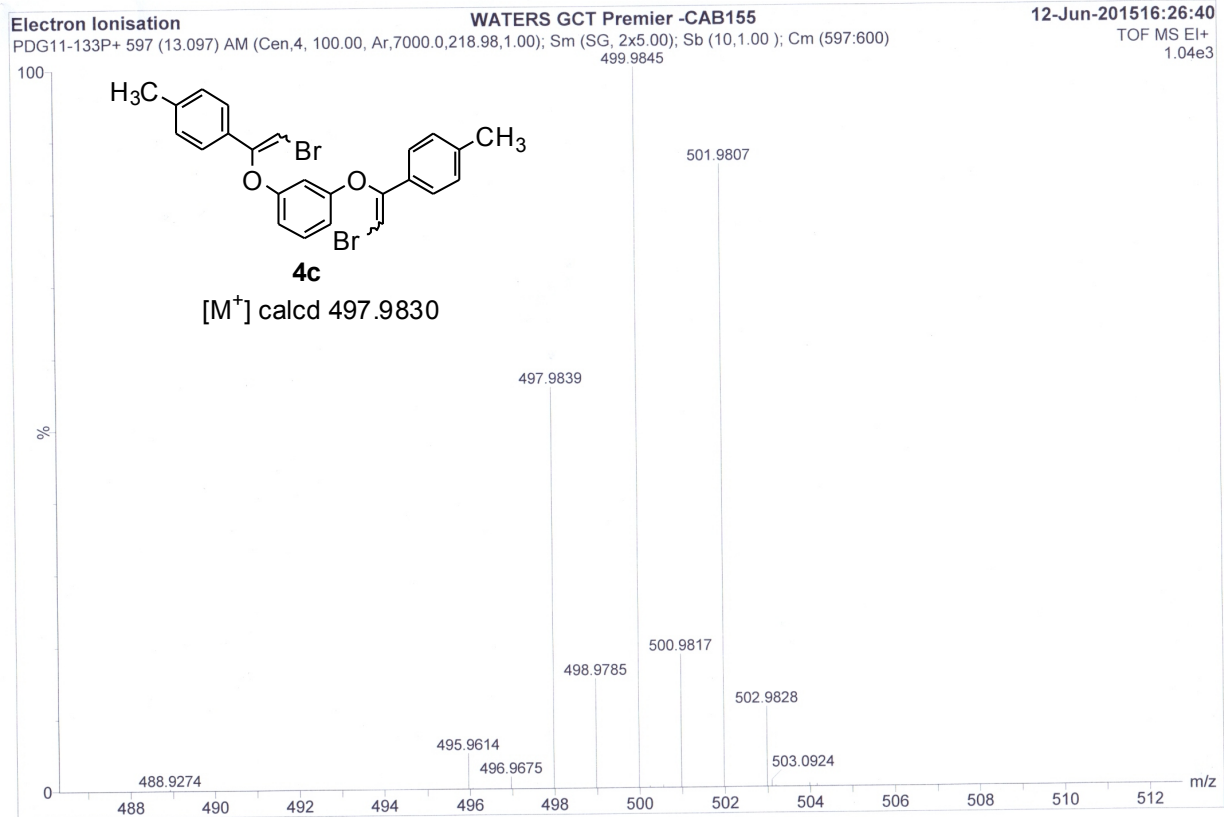

EI (HRMS) spectrum of **4c**

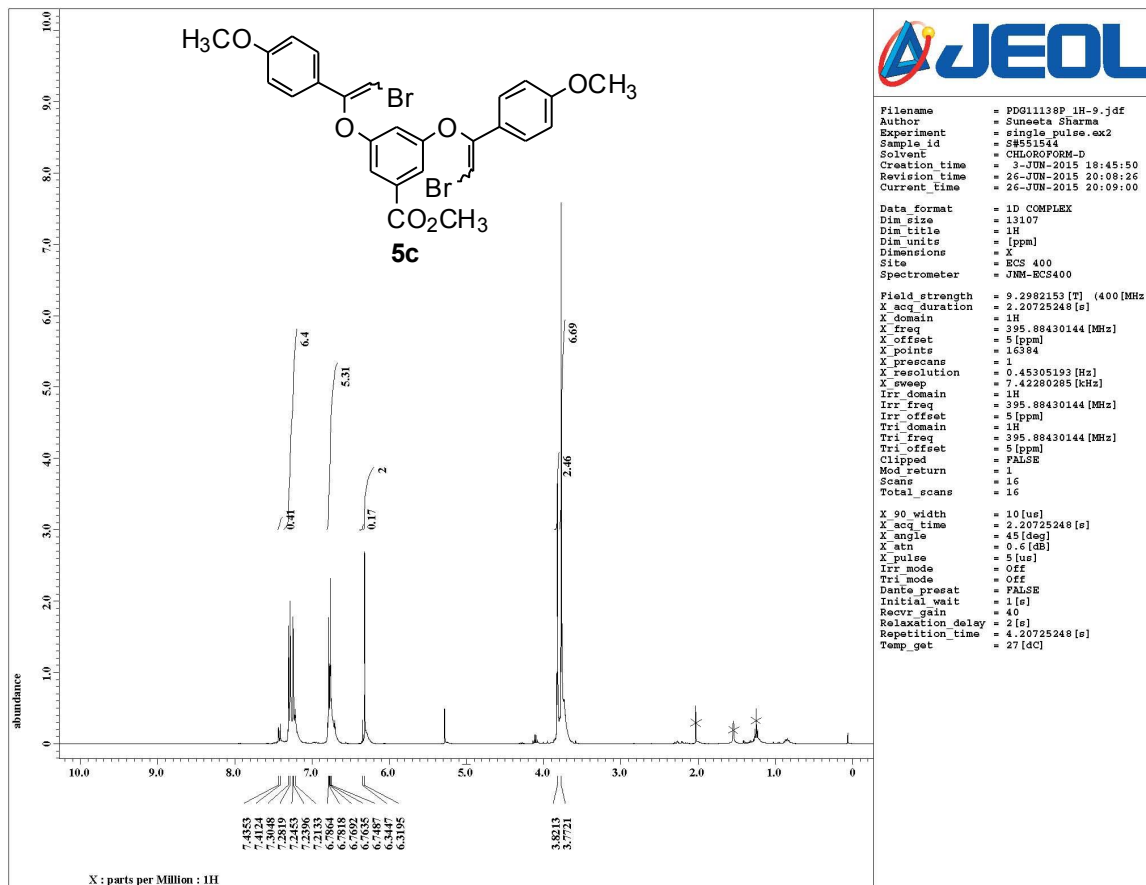

<sup>1</sup>H NMR (400 MHz, CDCl<sub>3</sub>) spectrum of **5c**

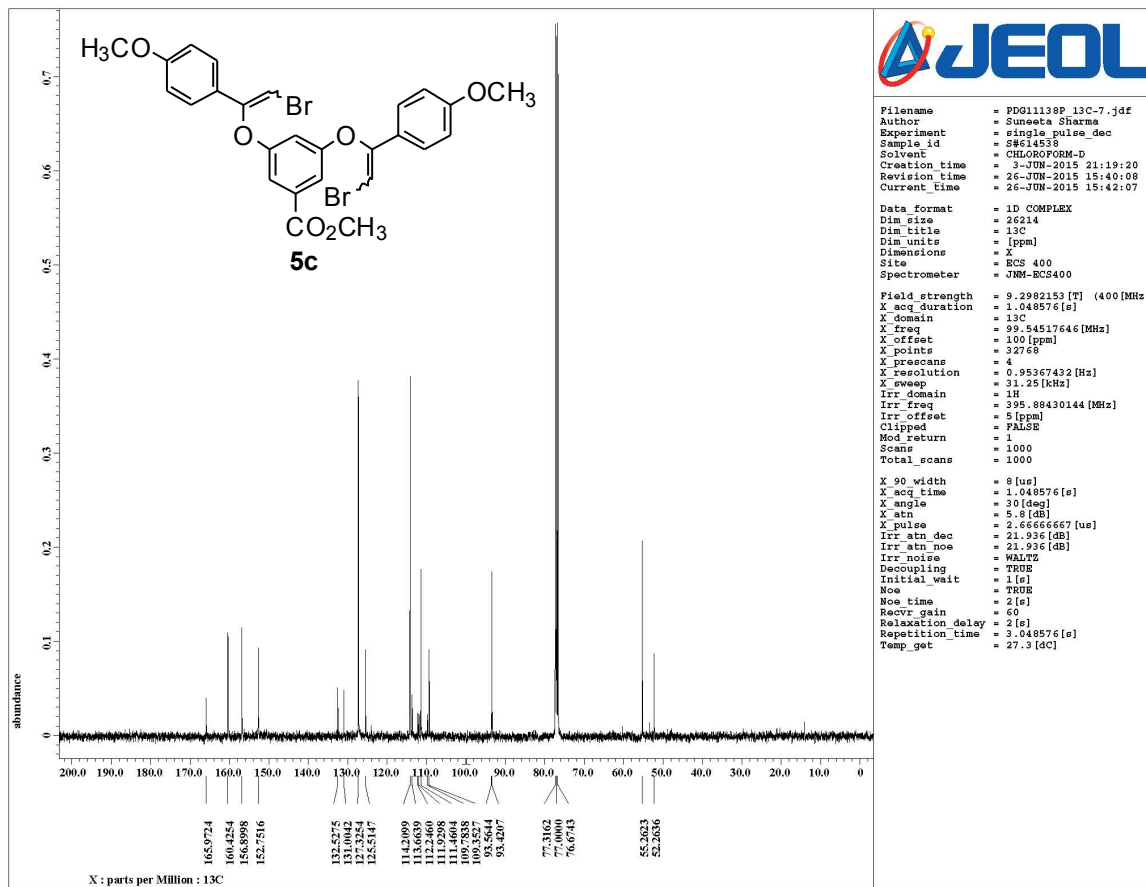

$^{13}\text{C}$  NMR (100 MHz,  $\text{CDCl}_3$ ) spectrum of **5c**

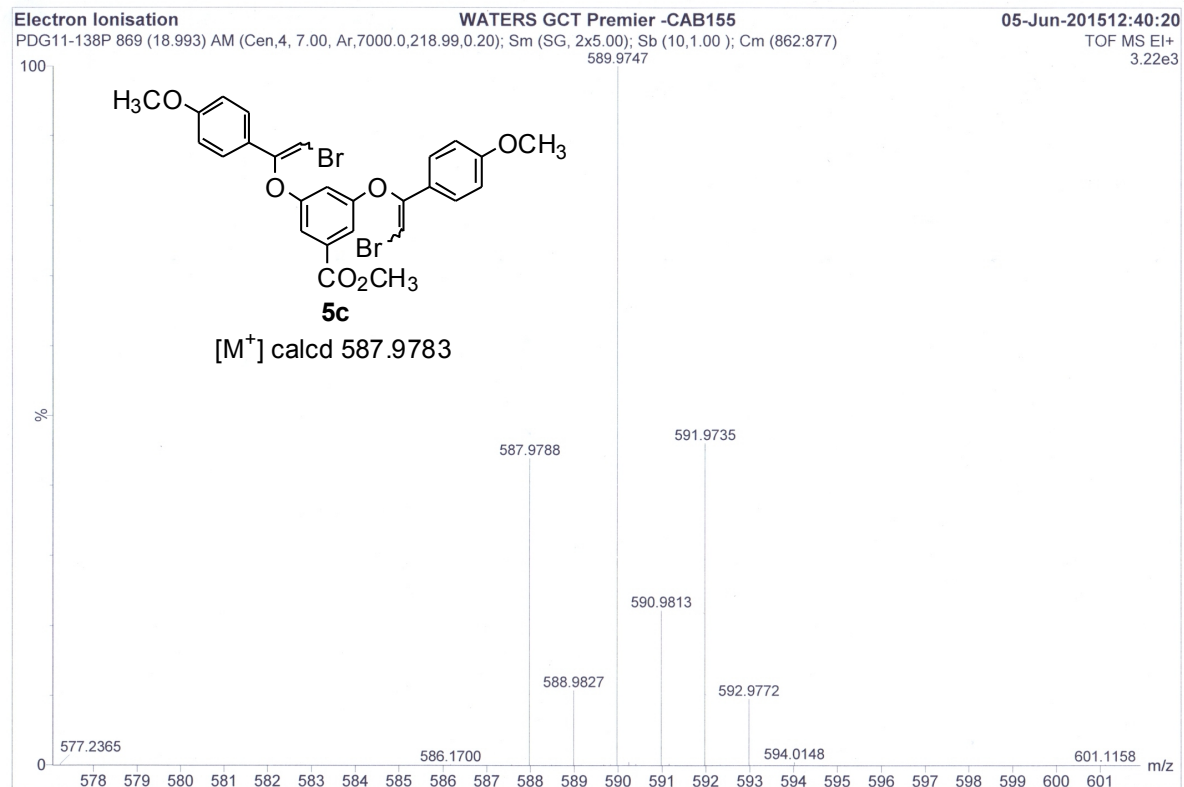

EI (HRMS) spectrum of **5c**



9.  $^1\text{H}$ ,  $^{13}\text{C}$  and HRMS spectra of benzodifurans 4.1 and 5.1:

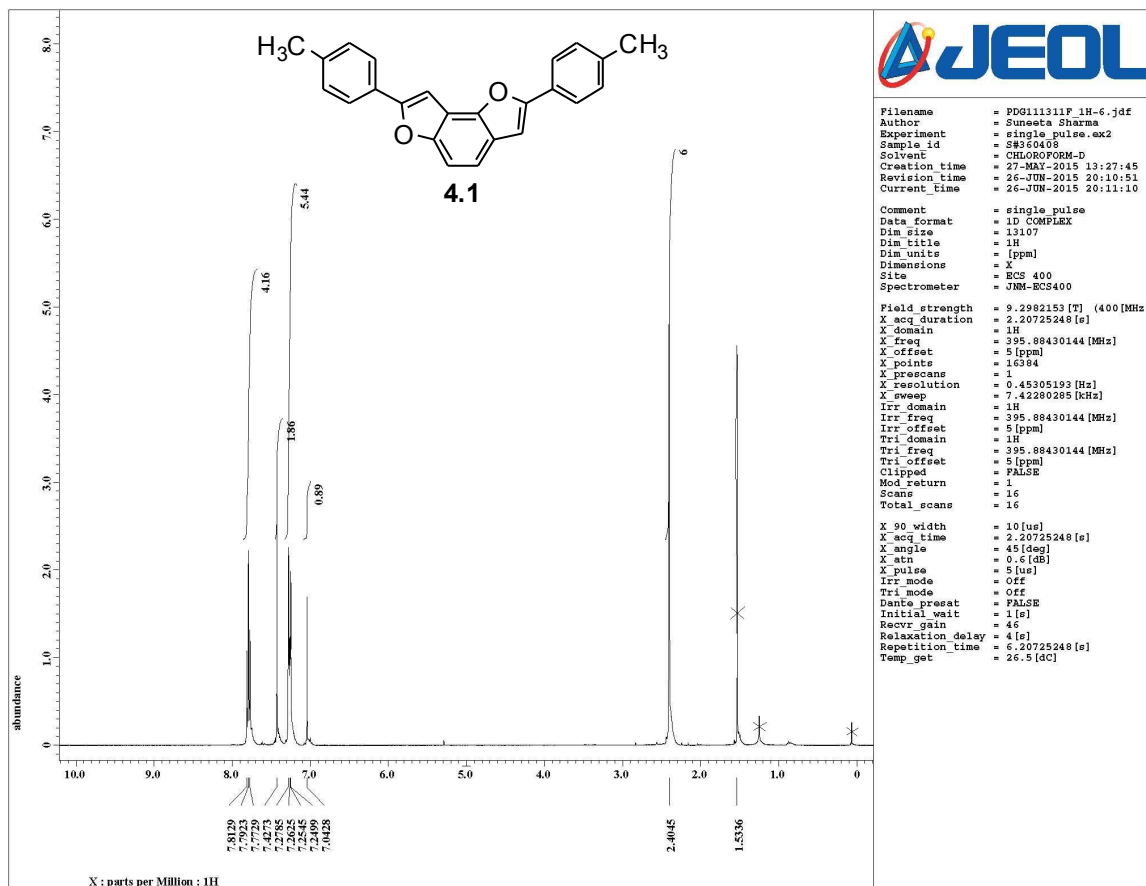

$^1\text{H}$  NMR (400 MHz, CDCl<sub>3</sub>) spectrum of 4.1

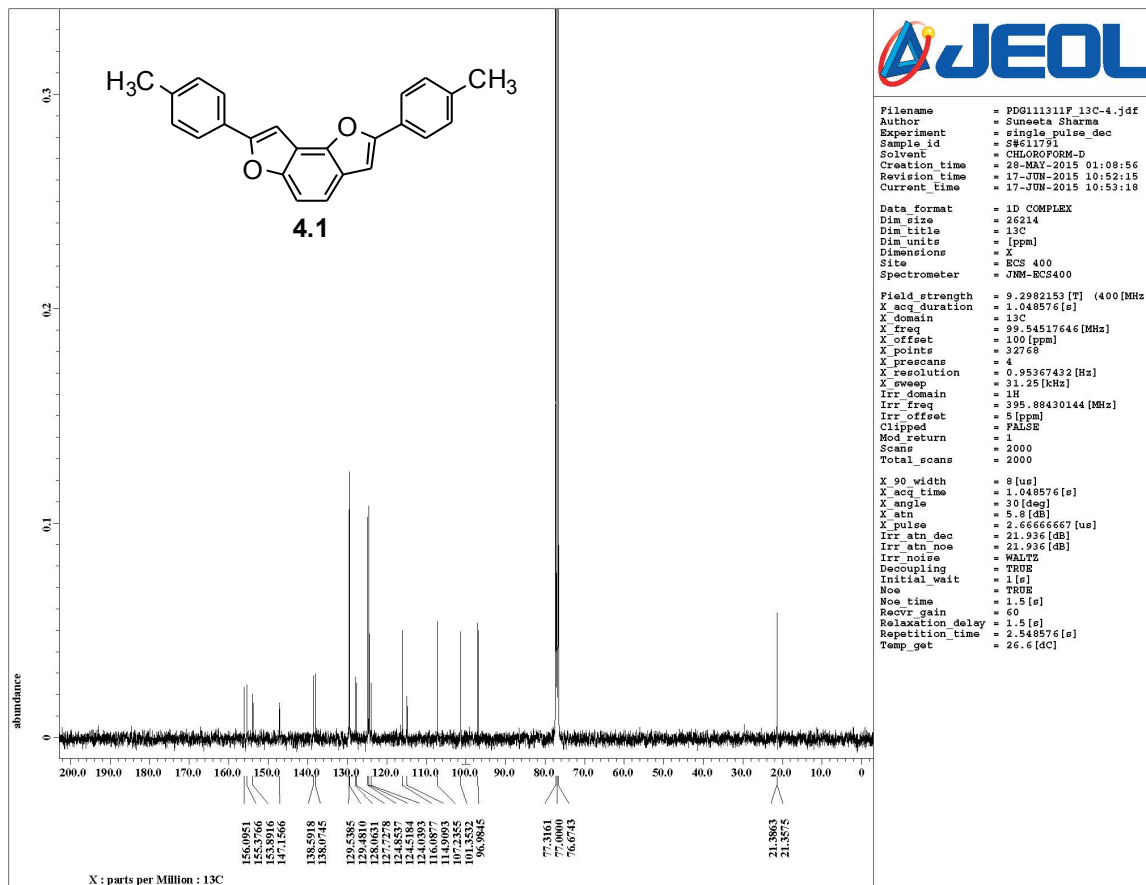

<sup>13</sup>C NMR (100 MHz, CDCl<sub>3</sub>) spectrum of **4.1**

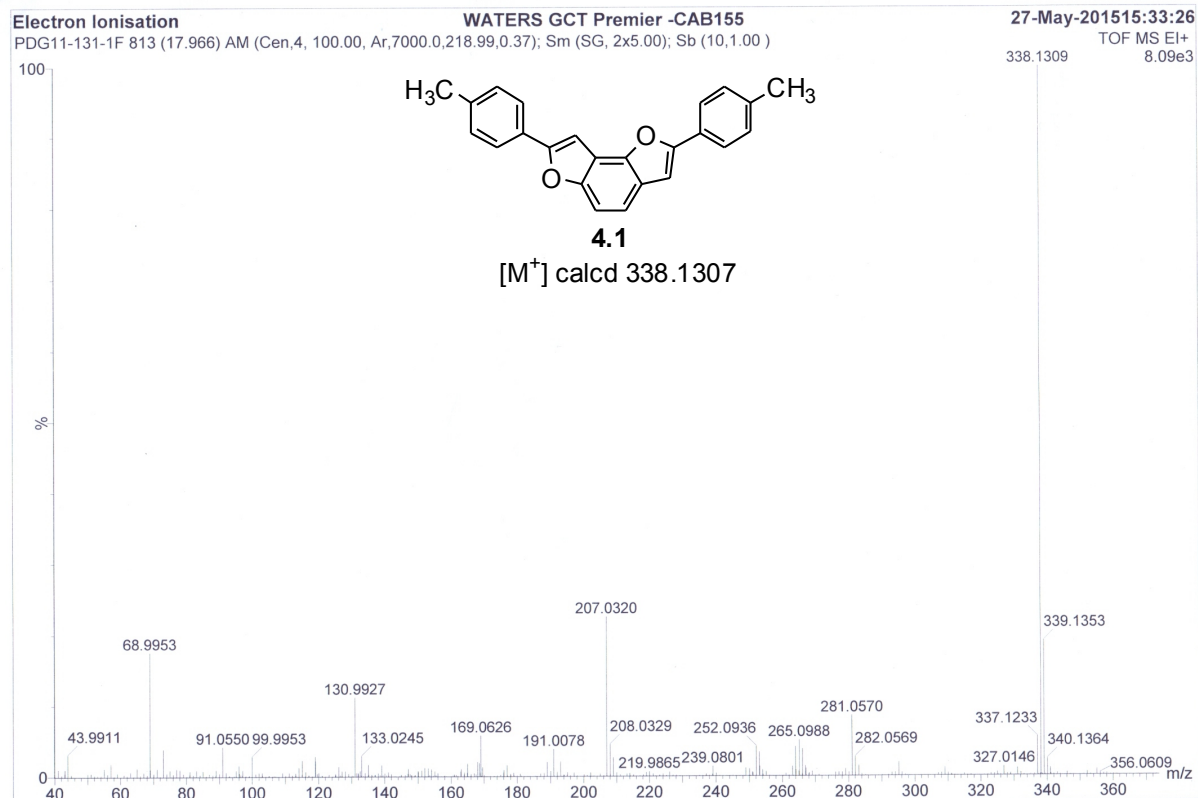

EI (HRMS) spectrum of **4.1**

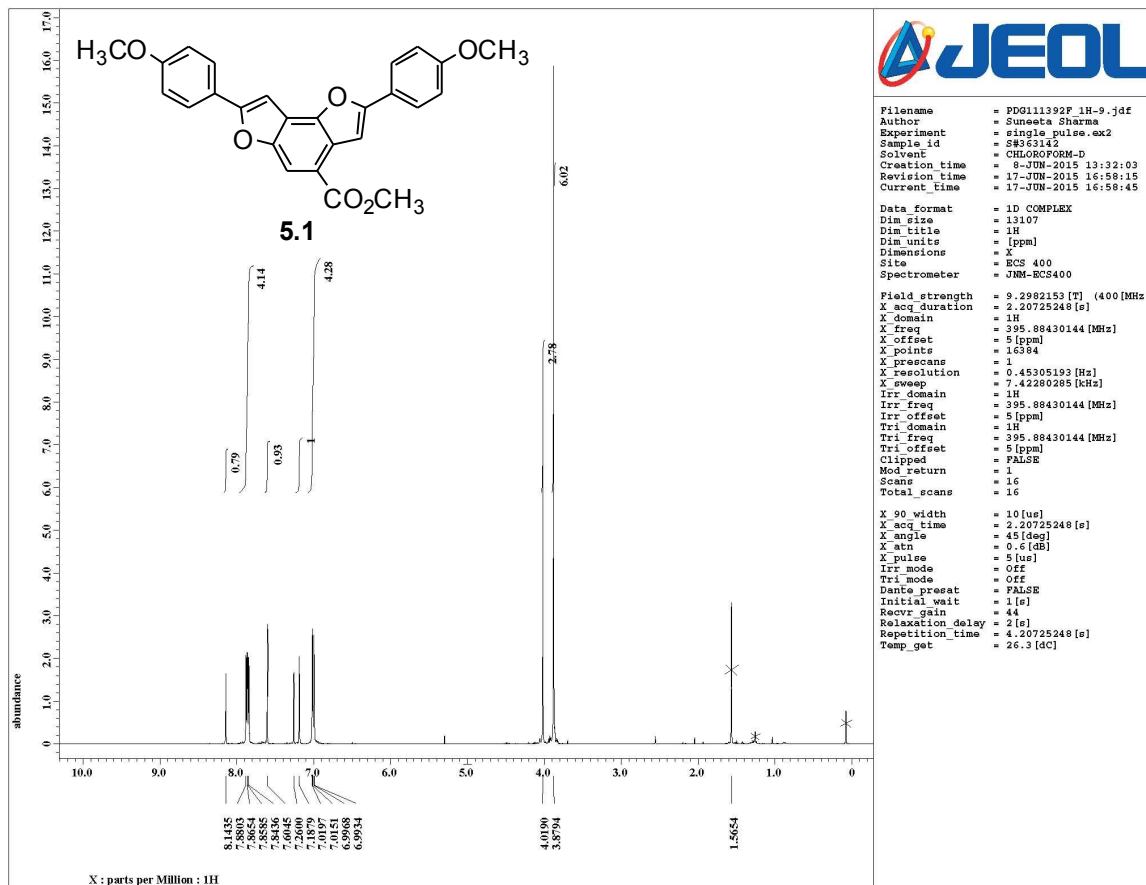

<sup>1</sup>H NMR (400 MHz, CDCl<sub>3</sub>) spectrum of **5.1**

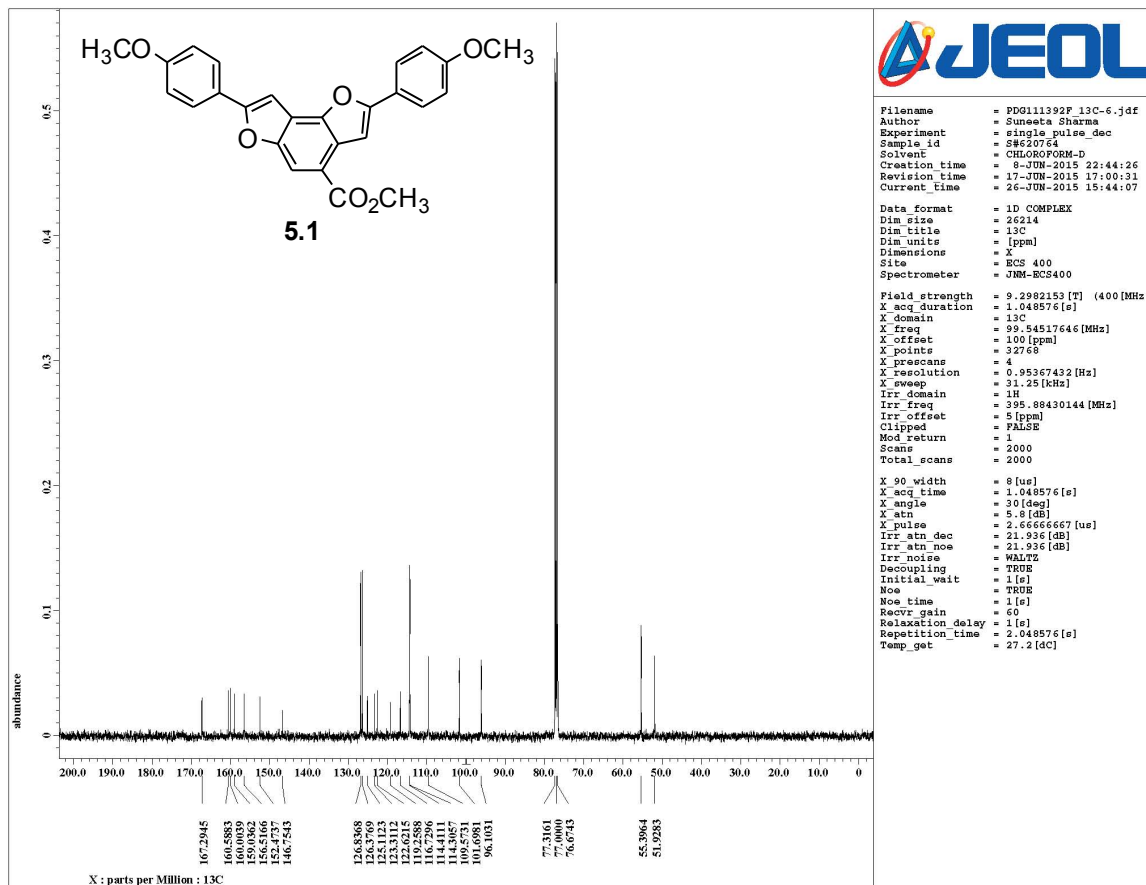

$^{13}\text{C}$  NMR (100 MHz,  $\text{CDCl}_3$ ) spectrum of **5.1**

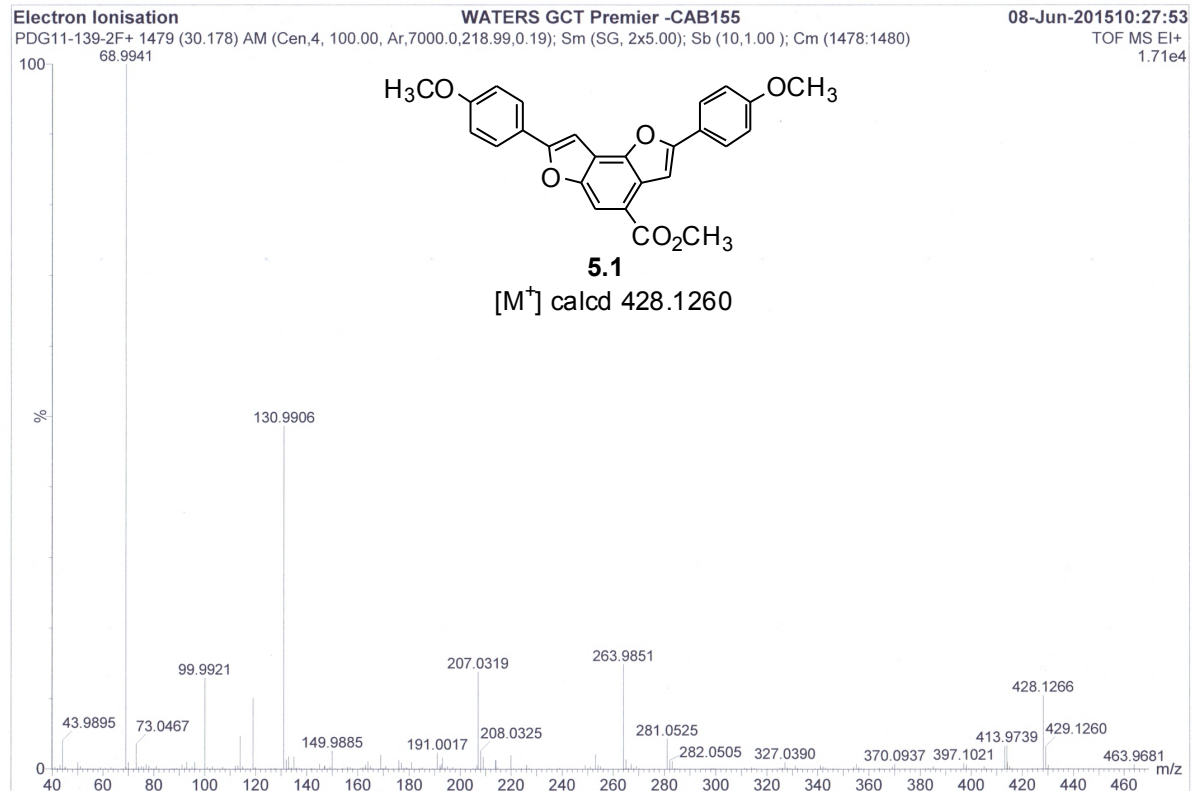

EI (HRMS) spectrum of **5.1**

## 10. Crystal structure of benzodifuran 4.1:

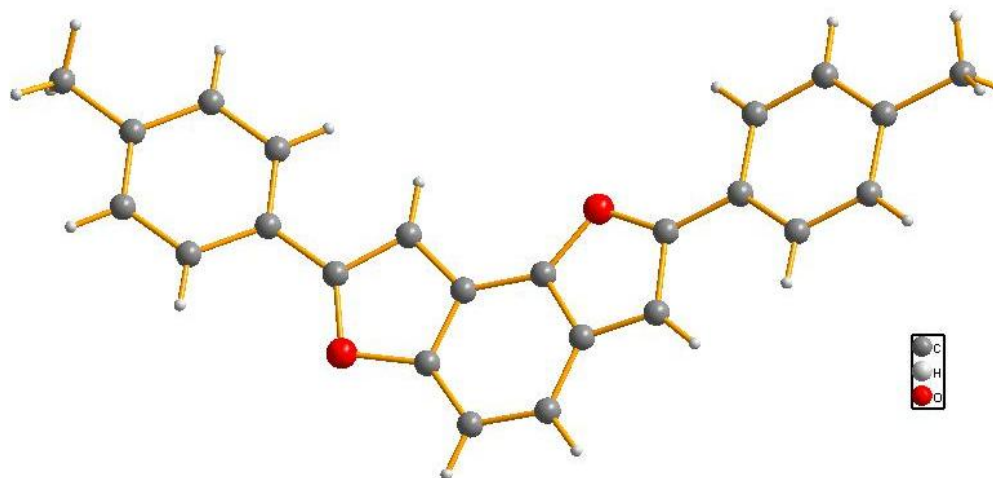

Fig. X-ray structure of **4.1**

The single crystal X-ray was recorded in Bruker SMART APEX-II CCD diffractometer. Data was collected at 273 K using graphite-monochromated MoK $\alpha$  radiation ( $\lambda = 0.71073 \text{ \AA}$ ). The crystal structure was solved by direct methods and was refined by full matrix least squares on  $F^2$  using SHELXL-97 and SHELXTL. All hydrogen atoms were included in idealized positions using a riding model. Anisotropic displacement parameters were used for refining non-hydrogen atoms.

Ref: (a) G. M. Sheldrick, *SHELXL-97, Program for Crystal Structure Solution and Refinement*; University of Göttingen, Göttingen, Germany, 1997; (b) G. M. Sheldrick, *Acta Cryst.*, 2008, **A64**, 112.

Crystal data for compound **4.1**: C<sub>48</sub>H<sub>36</sub>O<sub>4</sub>,  $M = 676.77$ , Monoclinic,  $a = 18.012(2) \text{ \AA}$ ,  $b = 6.5373(8) \text{ \AA}$ ,  $c = 14.3077(19) \text{ \AA}$ ,  $\alpha = 90.00^\circ$ ,  $\beta = 98.302(4)^\circ$ ,  $\gamma = 90.00^\circ$ ,  $V = 1667.1(4) \text{ \AA}^3$ ,  $T = 273(2) \text{ K}$ , space group Cc,  $Z = 2$ ,  $\mu(\text{MoK}\alpha) = 0.085 \text{ mm}^{-1}$ , 6737 reflections measured, 3191 independent reflections ( $R_{\text{int}} = 0.0642$ ). The final  $R_I$  values were 0.0978 ( $I > 2\sigma(I)$ ). The final  $wR(F^2)$  values were 0.2589 ( $I > 2\sigma(I)$ ). The final  $R_I$  values were 0.1541 (all data). The final  $wR(F^2)$  values were 0.3025 (all data). The goodness of fit on  $F^2$  was 1.065. CCDC number CCDC 1406195.
